# Supplementary material for: Detection and identification of O -GlcNAc-modified proteins using 6-azido-6-deoxy- N -acetyl-galactosamine
Source: Royal Society of Chemistry journal article supplement (doi:10.1039/c9ob00516a), 2019-01-01
Supplement: c9ob00516a2.xlsx [file c9ob00516a2.xlsx]

## Sheet: Ac36AzGalNAc
Accession	gene name	Exp1	Exp2	Exp3	nucleus	cytoplasm	extracellular or luminal
Q8TDZ2	[F-actin]-methionine sulfoxide oxidase MICAL1 OS=Homo sapiens GN=MICAL1 PE=1 SV=2 - [MICA1_HUMAN]	3	7	4		√
Q7RTP6	[F-actin]-methionine sulfoxide oxidase MICAL3 OS=Homo sapiens GN=MICAL3 PE=1 SV=2 - [MICA3_HUMAN]	16	10	14		√
P31947	14-3-3 protein sigma OS=Homo sapiens GN=SFN PE=1 SV=1 - [1433S_HUMAN]	7	6	4	√	√
D6RA66	15-hydroxyprostaglandin dehydrogenase [NAD(+)] (Fragment) OS=Homo sapiens GN=HPGD PE=1 SV=1 - [D6RA66_HUMAN]	1	1	1		√
Q9Y2I7	1-phosphatidylinositol 3-phosphate 5-kinase OS=Homo sapiens GN=PIKFYVE PE=1 SV=3 - [FYV1_HUMAN]	7	6	11		√
Q15147	1-phosphatidylinositol 4,5-bisphosphate phosphodiesterase beta-4 OS=Homo sapiens GN=PLCB4 PE=1 SV=3 - [PLCB4_HUMAN]	9	8	9		√
O00487	26S proteasome non-ATPase regulatory subunit 14 OS=Homo sapiens GN=PSMD14 PE=1 SV=1 - [PSDE_HUMAN]	6	3	6		√
H7C1H2	26S proteasome non-ATPase regulatory subunit 2 (Fragment) OS=Homo sapiens GN=PSMD2 PE=1 SV=1 - [H7C1H2_HUMAN]	7	7	6		√
P48556	26S proteasome non-ATPase regulatory subunit 8 OS=Homo sapiens GN=PSMD8 PE=1 SV=2 - [PSMD8_HUMAN]	5	6	3		√
F5H169	26S proteasome non-ATPase regulatory subunit 9 OS=Homo sapiens GN=PSMD9 PE=1 SV=1 - [F5H169_HUMAN]	2	3	2		√
O75600	2-amino-3-ketobutyrate coenzyme A ligase, mitochondrial OS=Homo sapiens GN=GCAT PE=1 SV=1 - [KBL_HUMAN]	3	6	3		√
Q99714	3-hydroxyacyl-CoA dehydrogenase type-2 OS=Homo sapiens GN=HSD17B10 PE=1 SV=3 - [HCD2_HUMAN]	5	5	5		√
P62249	40S ribosomal protein S16 OS=Homo sapiens GN=RPS16 PE=1 SV=2 - [RS16_HUMAN]	7	9	8		√
Q71UM5	40S ribosomal protein S27-like OS=Homo sapiens GN=RPS27L PE=1 SV=3 - [RS27L_HUMAN]	3	3	4		√
P62081	40S ribosomal protein S7 OS=Homo sapiens GN=RPS7 PE=1 SV=1 - [RS7_HUMAN]	3	3	2		√
Q13131	5'-AMP-activated protein kinase catalytic subunit alpha-1 OS=Homo sapiens GN=PRKAA1 PE=1 SV=4 - [AAPK1_HUMAN]	5	3	4		√
C9JL25	60 kDa heat shock protein, mitochondrial (Fragment) OS=Homo sapiens GN=HSPD1 PE=1 SV=1 - [C9JL25_HUMAN]	5	6	5		√
P46778	60S ribosomal protein L21 OS=Homo sapiens GN=RPL21 PE=1 SV=2 - [RL21_HUMAN]	5	3	5		√
P83731	60S ribosomal protein L24 OS=Homo sapiens GN=RPL24 PE=1 SV=1 - [RL24_HUMAN]	6	4	6		√
F2Z388	60S ribosomal protein L35 OS=Homo sapiens GN=RPL35 PE=1 SV=1 - [F2Z388_HUMAN]	2	2	2		√
J3KQN4	60S ribosomal protein L36a OS=Homo sapiens GN=RPL36A PE=3 SV=1 - [J3KQN4_HUMAN]	3	3	5		√
P61513	60S ribosomal protein L37a OS=Homo sapiens GN=RPL37A PE=1 SV=2 - [RL37A_HUMAN]	3	2	2		√
Q02878	60S ribosomal protein L6 OS=Homo sapiens GN=RPL6 PE=1 SV=3 - [RL6_HUMAN]	7	6	7		√
Q8WXS8	A disintegrin and metalloproteinase with thrombospondin motifs 14 OS=Homo sapiens GN=ADAMTS14 PE=2 SV=2 - [ATS14_HUMAN]	4	5	4		√	√
Q2L6I2	ABC50 protein OS=Homo sapiens GN=ABCF1 PE=4 SV=1 - [Q2L6I2_HUMAN]	5	8	10	√	√
Q8IZT6	Abnormal spindle-like microcephaly-associated protein OS=Homo sapiens GN=ASPM PE=1 SV=2 - [ASPM_HUMAN]	11	10	17	√	√	√
Q4LE36	ACLY variant protein (Fragment) OS=Homo sapiens GN=ACLY variant protein PE=2 SV=1 - [Q4LE36_HUMAN]	19	18	19		√
Q8TED9	Actin filament-associated protein 1-like 1 OS=Homo sapiens GN=AFAP1L1 PE=1 SV=2 - [AF1L1_HUMAN]	4	5	6		√
P68032	Actin, alpha cardiac muscle 1 OS=Homo sapiens GN=ACTC1 PE=1 SV=1 - [ACTC_HUMAN]	19	21	21		√
Q9H9F9	Actin-related protein 5 OS=Homo sapiens GN=ACTR5 PE=1 SV=2 - [ARP5_HUMAN]	6	3	5	√
Q9H981	Actin-related protein 8 OS=Homo sapiens GN=ACTR8 PE=1 SV=2 - [ARP8_HUMAN]	4	2	4	√
Q9H1I8	Activating signal cointegrator 1 complex subunit 2 OS=Homo sapiens GN=ASCC2 PE=1 SV=3 - [ASCC2_HUMAN]	5	7	3	√
Q5U623	Activating transcription factor 7-interacting protein 2 OS=Homo sapiens GN=ATF7IP2 PE=1 SV=2 - [MCAF2_HUMAN]	4	3	3	√
Q9H845	Acyl-CoA dehydrogenase family member 9, mitochondrial OS=Homo sapiens GN=ACAD9 PE=1 SV=1 - [ACAD9_HUMAN]	5	4	4		√
Q6NUN0	Acyl-coenzyme A synthetase ACSM5, mitochondrial OS=Homo sapiens GN=ACSM5 PE=1 SV=2 - [ACSM5_HUMAN]	4	4	2		√
Q9Y305	Acyl-coenzyme A thioesterase 9, mitochondrial OS=Homo sapiens GN=ACOT9 PE=1 SV=2 - [ACOT9_HUMAN]	4	3	6		√
P25054	Adenomatous polyposis coli protein OS=Homo sapiens GN=APC PE=1 SV=2 - [APC_HUMAN]	18	13	24		√	√
O43306	Adenylate cyclase type 6 OS=Homo sapiens GN=ADCY6 PE=1 SV=2 - [ADCY6_HUMAN]	6	3	2		√	√
B4E1L0	Adenylosuccinate synthetase isozyme 2 OS=Homo sapiens GN=ADSS PE=2 SV=1 - [B4E1L0_HUMAN]	1	2	1		√
O94910	Adhesion G protein-coupled receptor L1 OS=Homo sapiens GN=ADGRL1 PE=1 SV=1 - [AGRL1_HUMAN]	5	3	5		√	√
Q8IZF6	Adhesion G-protein coupled receptor G4 OS=Homo sapiens GN=ADGRG4 PE=2 SV=2 - [AGRG4_HUMAN]	5	4	9			√
P61204	ADP-ribosylation factor 3 OS=Homo sapiens GN=ARF3 PE=1 SV=2 - [ARF3_HUMAN]	12	9	14		√
Q9Y6U3	Adseverin OS=Homo sapiens GN=SCIN PE=1 SV=4 - [ADSV_HUMAN]	2	5	6		√
O75366	Advillin OS=Homo sapiens GN=AVIL PE=1 SV=3 - [AVIL_HUMAN]	5	5	9		√
P51826	AF4/FMR2 family member 3 OS=Homo sapiens GN=AFF3 PE=1 SV=2 - [AFF3_HUMAN]	3	2	7	√
Q9UHB7	AF4/FMR2 family member 4 OS=Homo sapiens GN=AFF4 PE=1 SV=1 - [AFF4_HUMAN]	6	7	9	√
J3KN01	Afadin OS=Homo sapiens GN=AFDN PE=1 SV=1 - [J3KN01_HUMAN]	20	19	16	√	√	√
Q8TD30	Alanine aminotransferase 2 OS=Homo sapiens GN=GPT2 PE=1 SV=1 - [ALAT2_HUMAN]	2	3	3		√
Q5JTZ9	Alanine--tRNA ligase, mitochondrial OS=Homo sapiens GN=AARS2 PE=1 SV=1 - [SYAM_HUMAN]	3	6	5		√
O60218	Aldo-keto reductase family 1 member B10 OS=Homo sapiens GN=AKR1B10 PE=1 SV=2 - [AK1BA_HUMAN]	3	1	1		√
O00116	Alkyldihydroxyacetonephosphate synthase, peroxisomal OS=Homo sapiens GN=AGPS PE=1 SV=1 - [ADAS_HUMAN]	4	8	6		√
P19652	Alpha-1-acid glycoprotein 2 OS=Homo sapiens GN=ORM2 PE=1 SV=2 - [A1AG2_HUMAN]	1	1	1		√	√
V9GYU9	Alpha-methylacyl-CoA racemase OS=Homo sapiens GN=AMACR PE=1 SV=1 - [V9GYU9_HUMAN]	1	2	4		√
Q86TB3	Alpha-protein kinase 2 OS=Homo sapiens GN=ALPK2 PE=2 SV=3 - [ALPK2_HUMAN]	8	8	12		√
Q96Q42	Alsin OS=Homo sapiens GN=ALS2 PE=1 SV=2 - [ALS2_HUMAN]	3	4	5		√
L0R6B6	Alternative protein A2M OS=Homo sapiens GN=A2M PE=4 SV=1 - [L0R6B6_HUMAN]	3	3	2		√	√
L8ECB1	Alternative protein ARRB2 OS=Homo sapiens GN=ARRB2 PE=4 SV=1 - [L8ECB1_HUMAN]	2	2	3	√	√
L8E9Z3	Alternative protein HRC OS=Homo sapiens GN=HRC PE=4 SV=1 - [L8E9Z3_HUMAN]	3	2	3		√
L8E9F8	Alternative protein INSM2 OS=Homo sapiens GN=INSM2 PE=4 SV=1 - [L8E9F8_HUMAN]	6	2	6	√
L0R8D2	Alternative protein RCOR1 OS=Homo sapiens GN=RCOR1 PE=4 SV=1 - [L0R8D2_HUMAN]	1	2	1	√
L8ECD7	Alternative protein TCHH OS=Homo sapiens GN=TCHH PE=4 SV=1 - [L8ECD7_HUMAN]	5	4	2		√
Q99767	Amyloid beta A4 precursor protein-binding family A member 2 OS=Homo sapiens GN=APBA2 PE=1 SV=3 - [APBA2_HUMAN]	4	2	5		√
Q9H1A4	Anaphase-promoting complex subunit 1 OS=Homo sapiens GN=ANAPC1 PE=1 SV=1 - [APC1_HUMAN]	6	7	6	√
F5H0F9	Anaphase-promoting complex subunit 5 OS=Homo sapiens GN=ANAPC5 PE=1 SV=1 - [F5H0F9_HUMAN]	4	4	5	√
Q8N7X0	Androglobin OS=Homo sapiens GN=ADGB PE=2 SV=3 - [ADGB_HUMAN]	8	12	10		√
Q9Y2J4	Angiomotin-like protein 2 OS=Homo sapiens GN=AMOTL2 PE=1 SV=3 - [AMOL2_HUMAN]	5	3	4	√	√	√
Q9P0K7	Ankycorbin OS=Homo sapiens GN=RAI14 PE=1 SV=2 - [RAI14_HUMAN]	12	13	9		√
Q8N961	Ankyrin repeat and BTB/POZ domain-containing protein 2 OS=Homo sapiens GN=ABTB2 PE=2 SV=2 - [ABTB2_HUMAN]	5	5	6		√
Q92625	Ankyrin repeat and SAM domain-containing protein 1A OS=Homo sapiens GN=ANKS1A PE=1 SV=4 - [ANS1A_HUMAN]	4	4	5		√
Q8N8V4	Ankyrin repeat and SAM domain-containing protein 4B OS=Homo sapiens GN=ANKS4B PE=1 SV=2 - [ANS4B_HUMAN]	5	3	2		√
Q8TF21	Ankyrin repeat domain-containing protein 24 OS=Homo sapiens GN=ANKRD24 PE=2 SV=2 - [ANR24_HUMAN]	5	6	8		√
R4GNA2	Ankyrin repeat domain-containing protein 30A OS=Homo sapiens GN=ANKRD30A PE=1 SV=1 - [R4GNA2_HUMAN]	5	5	11		√
Q9BXX2	Ankyrin repeat domain-containing protein 30B OS=Homo sapiens GN=ANKRD30B PE=2 SV=3 - [AN30B_HUMAN]	8	9	8		√
A6NC57	Ankyrin repeat domain-containing protein 62 OS=Homo sapiens GN=ANKRD62 PE=2 SV=4 - [ANR62_HUMAN]	6	11	8		√
A6NEL2	Ankyrin repeat domain-containing protein SOWAHB OS=Homo sapiens GN=SOWAHB PE=1 SV=1 - [SWAHB_HUMAN]	5	7	11		√
P16157	Ankyrin-1 OS=Homo sapiens GN=ANK1 PE=1 SV=3 - [ANK1_HUMAN]	6	5	7		√
D6RA82	Annexin OS=Homo sapiens GN=ANXA3 PE=1 SV=1 - [D6RA82_HUMAN]	7	6	5		√	√
H0YDD9	Anoctamin (Fragment) OS=Homo sapiens GN=ANO1 PE=1 SV=1 - [H0YDD9_HUMAN]	1	2	2		√
Q6IWH7	Anoctamin-7 OS=Homo sapiens GN=ANO7 PE=1 SV=2 - [ANO7_HUMAN]	4	2	2		√
O14617	AP-3 complex subunit delta-1 OS=Homo sapiens GN=AP3D1 PE=1 SV=1 - [AP3D1_HUMAN]	11	12	9		√
Q2VPB7	AP-5 complex subunit beta-1 OS=Homo sapiens GN=AP5B1 PE=1 SV=4 - [AP5B1_HUMAN]	2	2	4		√
P06727	Apolipoprotein A-IV OS=Homo sapiens GN=APOA4 PE=1 SV=3 - [APOA4_HUMAN]	4	4	4		√	√
C0JYY2	Apolipoprotein B (Including Ag(X) antigen) OS=Homo sapiens GN=APOB PE=4 SV=1 - [C0JYY2_HUMAN]	14	10	12		√	√
O95831	Apoptosis-inducing factor 1, mitochondrial OS=Homo sapiens GN=AIFM1 PE=1 SV=1 - [AIFM1_HUMAN]	9	4	9		√
Q9BUV0	Arginine/serine-rich protein 1 OS=Homo sapiens GN=RSRP1 PE=1 SV=2 - [RSRP1_HUMAN]	3	3	4		√
F8W8Y7	Armadillo repeat-containing X-linked protein 4 OS=Homo sapiens GN=ARMCX4 PE=1 SV=3 - [F8W8Y7_HUMAN]	4	7	7	√	√
O43776	Asparagine--tRNA ligase, cytoplasmic OS=Homo sapiens GN=NARS PE=1 SV=1 - [SYNC_HUMAN]	12	10	7		√
P14868	Aspartate--tRNA ligase, cytoplasmic OS=Homo sapiens GN=DARS PE=1 SV=2 - [SYDC_HUMAN]	11	11	14		√
Q5TGY3	AT-hook DNA-binding motif-containing protein 1 OS=Homo sapiens GN=AHDC1 PE=1 SV=1 - [AHDC1_HUMAN]	11	7	7	√
Q6PL18	ATPase family AAA domain-containing protein 2 OS=Homo sapiens GN=ATAD2 PE=1 SV=1 - [ATAD2_HUMAN]	8	7	6	√
Q8WWZ4	ATP-binding cassette sub-family A member 10 OS=Homo sapiens GN=ABCA10 PE=2 SV=3 - [ABCAA_HUMAN]	6	5	8		√
Q8WWZ7	ATP-binding cassette sub-family A member 5 OS=Homo sapiens GN=ABCA5 PE=2 SV=2 - [ABCA5_HUMAN]	6	4	6		√
Q8IZY2	ATP-binding cassette sub-family A member 7 OS=Homo sapiens GN=ABCA7 PE=1 SV=3 - [ABCA7_HUMAN]	6	6	8		√
O94911	ATP-binding cassette sub-family A member 8 OS=Homo sapiens GN=ABCA8 PE=1 SV=3 - [ABCA8_HUMAN]	3	5	3		√
Q9NRK6	ATP-binding cassette sub-family B member 10, mitochondrial OS=Homo sapiens GN=ABCB10 PE=1 SV=2 - [ABCBA_HUMAN]	4	2	3		√
O75027	ATP-binding cassette sub-family B member 7, mitochondrial OS=Homo sapiens GN=ABCB7 PE=1 SV=2 - [ABCB7_HUMAN]	10	8	12		√
A1L471	ATP-binding cassette, sub-family B (MDR/TAP), member 1 OS=Homo sapiens GN=ABCB1 PE=2 SV=1 - [A1L471_HUMAN]	7	9	9		√
O76031	ATP-dependent Clp protease ATP-binding subunit clpX-like, mitochondrial OS=Homo sapiens GN=CLPX PE=1 SV=2 - [CLPX_HUMAN]	8	6	6		√
Q9NVP1	ATP-dependent RNA helicase DDX18 OS=Homo sapiens GN=DDX18 PE=1 SV=2 - [DDX18_HUMAN]	7	8	5	√
Q9UHL0	ATP-dependent RNA helicase DDX25 OS=Homo sapiens GN=DDX25 PE=1 SV=2 - [DDX25_HUMAN]	3	4	3	√
Q9H2U1	ATP-dependent RNA helicase DHX36 OS=Homo sapiens GN=DHX36 PE=1 SV=2 - [DHX36_HUMAN]	12	10	11	√
Q8NFD5	AT-rich interactive domain-containing protein 1B OS=Homo sapiens GN=ARID1B PE=1 SV=2 - [ARI1B_HUMAN]	9	8	9	√
Q14865	AT-rich interactive domain-containing protein 5B OS=Homo sapiens GN=ARID5B PE=1 SV=3 - [ARI5B_HUMAN]	6	6	7	√
Q8WXX7	Autism susceptibility gene 2 protein OS=Homo sapiens GN=AUTS2 PE=1 SV=1 - [AUTS2_HUMAN]	7	3	8		√
Q4G0L2	BBS1 protein OS=Homo sapiens GN=BBS1 PE=2 SV=1 - [Q4G0L2_HUMAN]	4	3	3		√
P51572	B-cell receptor-associated protein 31 OS=Homo sapiens GN=BCAP31 PE=1 SV=3 - [BAP31_HUMAN]	6	6	7		√
Q9BXK5	Bcl-2-like protein 13 OS=Homo sapiens GN=BCL2L13 PE=1 SV=1 - [B2L13_HUMAN]	2	2	4	√
Q5H9F3	BCL-6 corepressor-like protein 1 OS=Homo sapiens GN=BCORL1 PE=1 SV=1 - [BCORL_HUMAN]	7	6	6	√
A9UF07	BCR/ABL fusion protein isoform Y5 OS=Homo sapiens GN=BCR/ABL fusion PE=2 SV=1 - [A9UF07_HUMAN]	8	11	14		√
B1WB49	BDP1 protein (Fragment) OS=Homo sapiens GN=BDP1 PE=2 SV=1 - [B1WB49_HUMAN]	14	11	11	√
O15155	BET1 homolog OS=Homo sapiens GN=BET1 PE=1 SV=1 - [BET1_HUMAN]	1	2	1		√
Q5T4J0	Beta-1,3-galactosyl-O-glycosyl-glycoprotein beta-1,6-N-acetylglucosaminyltransferase 6 OS=Homo sapiens GN=GCNT6 PE=3 SV=2 - [GCNT6_HUMAN]	1	1	1		√
A2RRG5	BMP8A protein OS=Homo sapiens GN=BMP8A PE=2 SV=1 - [A2RRG5_HUMAN]	2	1	2		√	√
Q9NWK9	Box C/D snoRNA protein 1 OS=Homo sapiens GN=ZNHIT6 PE=1 SV=1 - [BCD1_HUMAN]	7	4	4		√
O14514	Brain-specific angiogenesis inhibitor 1 OS=Homo sapiens GN=BAI1 PE=1 SV=2 - [BAI1_HUMAN]	2	4	2			√
Q9UHR4	Brain-specific angiogenesis inhibitor 1-associated protein 2-like protein 1 OS=Homo sapiens GN=BAIAP2L1 PE=1 SV=2 - [BI2L1_HUMAN]	5	2	4		√
P51587	Breast cancer type 2 susceptibility protein OS=Homo sapiens GN=BRCA2 PE=1 SV=3 - [BRCA2_HUMAN]	16	11	18		√
Q6RI45	Bromodomain and WD repeat-containing protein 3 OS=Homo sapiens GN=BRWD3 PE=1 SV=2 - [BRWD3_HUMAN]	7	5	8	√
Q9BWV1	Brother of CDO OS=Homo sapiens GN=BOC PE=1 SV=1 - [BOC_HUMAN]	1	5	4	√		√
Q4VAN1	BTN1A1 protein OS=Homo sapiens GN=BTN1A1 PE=1 SV=1 - [Q4VAN1_HUMAN]	1	2	3		√	√
Q13895	Bystin OS=Homo sapiens GN=BYSL PE=1 SV=3 - [BYST_HUMAN]	4	3	3		√
Q8IXK1	C1q receptor protein OS=Homo sapiens GN=CD93 PE=2 SV=1 - [Q8IXK1_HUMAN]	2	2	3			√
Q8NCU7	C2 calcium-dependent domain-containing protein 4A OS=Homo sapiens GN=C2CD4A PE=2 SV=2 - [C2C4A_HUMAN]	5	5	6	√	√
O43745	Calcineurin B homologous protein 2 OS=Homo sapiens GN=CHP2 PE=1 SV=3 - [CHP2_HUMAN]	1	3	1	√
B7ZKY2	Calcium/calmodulin-dependent serine protein kinase (MAGUK family) OS=Homo sapiens GN=CASK PE=2 SV=1 - [B7ZKY2_HUMAN]	5	10	9	√	√
F1T0E5	Calcium-dependent secretion activator 1 OS=Homo sapiens GN=CADPS PE=1 SV=1 - [F1T0E5_HUMAN]	2	6	5	√
Q9Y2V2	Calcium-regulated heat-stable protein 1 OS=Homo sapiens GN=CARHSP1 PE=1 SV=2 - [CHSP1_HUMAN]	1	1	2	√
P27482	Calmodulin-like protein 3 OS=Homo sapiens GN=CALML3 PE=1 SV=2 - [CALL3_HUMAN]	1	2	3	√
Q08AD1	Calmodulin-regulated spectrin-associated protein 2 OS=Homo sapiens GN=CAMSAP2 PE=1 SV=3 - [CAMP2_HUMAN]	7	5	10		√
Q9P1Y5	Calmodulin-regulated spectrin-associated protein 3 OS=Homo sapiens GN=CAMSAP3 PE=1 SV=2 - [CAMP3_HUMAN]	5	5	5		√
M0R3D7	Calpain-12 OS=Homo sapiens GN=CAPN12 PE=1 SV=1 - [M0R3D7_HUMAN]	2	2	2		√
P17612	cAMP-dependent protein kinase catalytic subunit alpha OS=Homo sapiens GN=PRKACA PE=1 SV=2 - [KAPCA_HUMAN]	7	5	7		√
Q92887	Canalicular multispecific organic anion transporter 1 OS=Homo sapiens GN=ABCC2 PE=1 SV=3 - [MRP2_HUMAN]	2	3	4	√		√
A7E2F7	CAP-GLY domain containing linker protein 2 OS=Homo sapiens GN=CLIP2 PE=2 SV=1 - [A7E2F7_HUMAN]	5	6	9		√
P30622	CAP-Gly domain-containing linker protein 1 OS=Homo sapiens GN=CLIP1 PE=1 SV=2 - [CLIP1_HUMAN]	10	8	14		√
Q8ND23	Capping protein, Arp2/3 and myosin-I linker protein 3 OS=Homo sapiens GN=CARMIL3 PE=2 SV=2 - [CARL3_HUMAN]	3	2	5		√
Q8NCG5	Carbohydrate sulfotransferase 4 OS=Homo sapiens GN=CHST4 PE=1 SV=2 - [CHST4_HUMAN]	1	2	1		√
O75976	Carboxypeptidase D OS=Homo sapiens GN=CPD PE=1 SV=2 - [CBPD_HUMAN]	6	4	7		√
Q8N3K9	Cardiomyopathy-associated protein 5 OS=Homo sapiens GN=CMYA5 PE=1 SV=3 - [CMYA5_HUMAN]	18	15	8		√
H7BYT1	Casein kinase I isoform delta OS=Homo sapiens GN=CSNK1D PE=1 SV=2 - [H7BYT1_HUMAN]	3	4	4	√	√
Q8WXE0	Caskin-2 OS=Homo sapiens GN=CASKIN2 PE=1 SV=2 - [CSKI2_HUMAN]	4	6	5		√
Q9BXL7	Caspase recruitment domain-containing protein 11 OS=Homo sapiens GN=CARD11 PE=1 SV=3 - [CAR11_HUMAN]	6	5	10		√
A7MD03	CCDC132 protein OS=Homo sapiens GN=CCDC132 PE=2 SV=1 - [A7MD03_HUMAN]	4	7	5		√
Q9UKZ1	CCR4-NOT transcription complex subunit 11 OS=Homo sapiens GN=CNOT11 PE=1 SV=1 - [CNO11_HUMAN]	2	3	3	√	√
Q6YHK3	CD109 antigen OS=Homo sapiens GN=CD109 PE=1 SV=2 - [CD109_HUMAN]	5	2	5		√	√
Q9Y5K6	CD2-associated protein OS=Homo sapiens GN=CD2AP PE=1 SV=1 - [CD2AP_HUMAN]	8	5	3		√
Q86Y37	CDK2-associated and cullin domain-containing protein 1 OS=Homo sapiens GN=CACUL1 PE=1 SV=1 - [CACL1_HUMAN]	1	1	2	√	√
K7EQ89	CDP-diacylglycerol--glycerol-3-phosphate 3-phosphatidyltransferase, mitochondrial (Fragment) OS=Homo sapiens GN=PGS1 PE=4 SV=1 - [K7EQ89_HUMAN]	2	1	2		√
A0PJB2	CDT1 protein (Fragment) OS=Homo sapiens GN=CDT1 PE=2 SV=1 - [A0PJB2_HUMAN]	5	3	2	√
Q86Y33	Cell division cycle protein 20 homolog B OS=Homo sapiens GN=CDC20B PE=1 SV=3 - [CD20B_HUMAN]	3	2	3		√
O60308	Centrosomal protein of 104 kDa OS=Homo sapiens GN=CEP104 PE=1 SV=1 - [CE104_HUMAN]	6	4	6		√
Q6ZU80	Centrosomal protein of 128 kDa OS=Homo sapiens GN=CEP128 PE=1 SV=2 - [CE128_HUMAN]	10	4	14		√
Q66GS9	Centrosomal protein of 135 kDa OS=Homo sapiens GN=CEP135 PE=1 SV=2 - [CP135_HUMAN]	10	6	10		√
H0Y2V6	Centrosomal protein of 170 kDa (Fragment) OS=Homo sapiens GN=CEP170 PE=1 SV=1 - [H0Y2V6_HUMAN]	19	18	14		√
Q9C0D2	Centrosomal protein of 295 kDa OS=Homo sapiens GN=CEP295 PE=1 SV=4 - [CE295_HUMAN]	10	8	4		√
Q96ST8	Centrosomal protein of 89 kDa OS=Homo sapiens GN=CEP89 PE=1 SV=3 - [CEP89_HUMAN]	2	3	5		√
Q9NUG4	Cerebral cavernous malformations 2 protein-like OS=Homo sapiens GN=CCM2L PE=2 SV=3 - [CCM2L_HUMAN]	5	7	3	√	√
Q13976	cGMP-dependent protein kinase 1 OS=Homo sapiens GN=PRKG1 PE=1 SV=3 - [KGP1_HUMAN]	4	4	9		√
Q13237	cGMP-dependent protein kinase 2 OS=Homo sapiens GN=PRKG2 PE=1 SV=1 - [KGP2_HUMAN]	2	6	6		√
B7ZML1	CHD9 protein OS=Homo sapiens GN=CHD9 PE=2 SV=1 - [B7ZML1_HUMAN]	10	7	9	√	√
P35523	Chloride channel protein 1 OS=Homo sapiens GN=CLCN1 PE=1 SV=3 - [CLCN1_HUMAN]	4	3	3			√
X6R700	Chromatin target of PRMT1 protein OS=Homo sapiens GN=CHTOP PE=1 SV=1 - [X6R700_HUMAN]	6	5	5	√
P45973	Chromobox protein homolog 5 OS=Homo sapiens GN=CBX5 PE=1 SV=1 - [CBX5_HUMAN]	2	5	4	√
B0QXZ6	Chromobox protein homolog 6 OS=Homo sapiens GN=CBX6 PE=1 SV=1 - [B0QXZ6_HUMAN]	4	4	3	√
Q9Y232	Chromodomain Y-like protein OS=Homo sapiens GN=CDYL PE=1 SV=2 - [CDYL1_HUMAN]	4	5	5	√
F5GWX5	Chromodomain-helicase-DNA-binding protein 4 OS=Homo sapiens GN=CHD4 PE=1 SV=1 - [F5GWX5_HUMAN]	29	29	28	√
Q8TDI0	Chromodomain-helicase-DNA-binding protein 5 OS=Homo sapiens GN=CHD5 PE=1 SV=1 - [CHD5_HUMAN]	14	12	11	√
D3DRP5	Chromosome 9 open reading frame 19, isoform CRA_a (Fragment) OS=Homo sapiens GN=C9orf19 PE=4 SV=1 - [D3DRP5_HUMAN]	6	4	4		√
Q66X48	CIITA IV OS=Homo sapiens GN=MHC2TA PE=2 SV=1 - [Q66X48_HUMAN]	5	3	3	√
Q8N1V2	Cilia- and flagella-associated protein 52 OS=Homo sapiens GN=CFAP52 PE=1 SV=3 - [CFA52_HUMAN]	2	3	3		√
Q96M91	Cilia- and flagella-associated protein 53 OS=Homo sapiens GN=CFAP53 PE=1 SV=2 - [CFA53_HUMAN]	2	6	1		√
Q5T655	Cilia- and flagella-associated protein 58 OS=Homo sapiens GN=CFAP58 PE=1 SV=1 - [CFA58_HUMAN]	5	5	10		√
Q5T0N1	Cilia- and flagella-associated protein 70 OS=Homo sapiens GN=CFAP70 PE=2 SV=3 - [CFA70_HUMAN]	6	2	7		√
Q9P2B7	Cilia- and flagella-associated protein 97 OS=Homo sapiens GN=CFAP97 PE=1 SV=2 - [CFA97_HUMAN]	5	5	4		√
K7EL87	Claudin OS=Homo sapiens GN=CLDN7 PE=3 SV=1 - [K7EL87_HUMAN]	1	1	1		√	√
P56748	Claudin-8 OS=Homo sapiens GN=CLDN8 PE=1 SV=1 - [CLD8_HUMAN]	1	1	1		√	√
O00748	Cocaine esterase OS=Homo sapiens GN=CES2 PE=1 SV=1 - [EST2_HUMAN]	1	1	2		√
Q8IWY9	Codanin-1 OS=Homo sapiens GN=CDAN1 PE=1 SV=4 - [CDAN1_HUMAN]	3	3	5	√	√	√
Q8WVM7	Cohesin subunit SA-1 OS=Homo sapiens GN=STAG1 PE=1 SV=3 - [STAG1_HUMAN]	12	10	12	√
Q96A19	Coiled-coil domain-containing protein 102A OS=Homo sapiens GN=CCDC102A PE=1 SV=2 - [C102A_HUMAN]	5	6	4		√
D6RF76	Coiled-coil domain-containing protein 112 OS=Homo sapiens GN=CCDC112 PE=1 SV=1 - [D6RF76_HUMAN]	3	3	4		√
Q8IYE1	Coiled-coil domain-containing protein 13 OS=Homo sapiens GN=CCDC13 PE=1 SV=2 - [CCD13_HUMAN]	7	6	4		√
Q6ZUS6	Coiled-coil domain-containing protein 149 OS=Homo sapiens GN=CCDC149 PE=2 SV=2 - [CC149_HUMAN]	8	6	8		√
Q569K6	Coiled-coil domain-containing protein 157 OS=Homo sapiens GN=CCDC157 PE=2 SV=3 - [CC157_HUMAN]	3	4	2		√
P0CW27	Coiled-coil domain-containing protein 166 OS=Homo sapiens GN=CCDC166 PE=4 SV=1 - [CC166_HUMAN]	4	3	2		√
P0C221	Coiled-coil domain-containing protein 175 OS=Homo sapiens GN=CCDC175 PE=4 SV=2 - [CC175_HUMAN]	4	5	4		√
Q5T9S5	Coiled-coil domain-containing protein 18 OS=Homo sapiens GN=CCDC18 PE=1 SV=1 - [CCD18_HUMAN]	13	9	7		√
Q8N715	Coiled-coil domain-containing protein 185 OS=Homo sapiens GN=CCDC185 PE=1 SV=2 - [CC185_HUMAN]	5	7	5		√
Q5VVM6	Coiled-coil domain-containing protein 30 OS=Homo sapiens GN=CCDC30 PE=2 SV=1 - [CCD30_HUMAN]	5	4	8		√
Q502W7	Coiled-coil domain-containing protein 38 OS=Homo sapiens GN=CCDC38 PE=2 SV=1 - [CCD38_HUMAN]	4	5	4		√
Q9UFE4	Coiled-coil domain-containing protein 39 OS=Homo sapiens GN=CCDC39 PE=2 SV=3 - [CCD39_HUMAN]	9	5	8		√
Q2TAC2	Coiled-coil domain-containing protein 57 OS=Homo sapiens GN=CCDC57 PE=1 SV=2 - [CCD57_HUMAN]	7	4	9		√
Q8IWA6	Coiled-coil domain-containing protein 60 OS=Homo sapiens GN=CCDC60 PE=1 SV=2 - [CCD60_HUMAN]	6	3	5		√
Q8IV32	Coiled-coil domain-containing protein 71 OS=Homo sapiens GN=CCDC71 PE=1 SV=3 - [CCD71_HUMAN]	4	2	2		√
Q9H6F5	Coiled-coil domain-containing protein 86 OS=Homo sapiens GN=CCDC86 PE=1 SV=1 - [CCD86_HUMAN]	2	3	2		√
F8W9X7	Coiled-coil domain-containing protein 93 OS=Homo sapiens GN=CCDC93 PE=1 SV=1 - [F8W9X7_HUMAN]	2	4	7		√
P38432	Coilin OS=Homo sapiens GN=COIL PE=1 SV=1 - [COIL_HUMAN]	1	3	4	√
Q9BXJ5	Complement C1q tumor necrosis factor-related protein 2 OS=Homo sapiens GN=C1QTNF2 PE=1 SV=1 - [C1QT2_HUMAN]	1	3	2			√
P01024	Complement C3 OS=Homo sapiens GN=C3 PE=1 SV=2 - [CO3_HUMAN]	7	9	11	√	√	√
Q15021	Condensin complex subunit 1 OS=Homo sapiens GN=NCAPD2 PE=1 SV=3 - [CND1_HUMAN]	11	9	6	√	√
P51160	Cone cGMP-specific 3',5'-cyclic phosphodiesterase subunit alpha' OS=Homo sapiens GN=PDE6C PE=1 SV=2 - [PDE6C_HUMAN]	5	4	5		√	√
Q9NX05	Constitutive coactivator of PPAR-gamma-like protein 2 OS=Homo sapiens GN=FAM120C PE=2 SV=3 - [F120C_HUMAN]	6	5	5		√
B4E3S0	Coronin OS=Homo sapiens GN=CORO1C PE=1 SV=1 - [B4E3S0_HUMAN]	5	5	6		√
J3KN20	CREB/ATF bZIP transcription factor (Fragment) OS=Homo sapiens GN=CREBZF PE=1 SV=1 - [J3KN20_HUMAN]	5	3	3	√
I3NI09	C-type lectin domain family 10 member A (Fragment) OS=Homo sapiens GN=CLEC10A PE=4 SV=2 - [I3NI09_HUMAN]	2	2	4	√		√
Q9UBG0	C-type mannose receptor 2 OS=Homo sapiens GN=MRC2 PE=1 SV=2 - [MRC2_HUMAN]	3	3	6		√	√
Q7Z408	CUB and sushi domain-containing protein 2 OS=Homo sapiens GN=CSMD2 PE=1 SV=2 - [CSMD2_HUMAN]	7	4	5	√	√	√
H0Y7D7	Cyclic AMP-dependent transcription factor ATF-6 beta (Fragment) OS=Homo sapiens GN=ATF6B PE=1 SV=1 - [H0Y7D7_HUMAN]	4	3	2	√	√
Q15828	Cystatin-M OS=Homo sapiens GN=CST6 PE=1 SV=1 - [CYTM_HUMAN]	1	1	2		√	√
P50461	Cysteine and glycine-rich protein 3 OS=Homo sapiens GN=CSRP3 PE=1 SV=1 - [CSRP3_HUMAN]	3	2	3	√
Q7KZN9	Cytochrome c oxidase assembly protein COX15 homolog OS=Homo sapiens GN=COX15 PE=1 SV=1 - [COX15_HUMAN]	3	2	2		√
Q49B96	Cytochrome c oxidase assembly protein COX19 OS=Homo sapiens GN=COX19 PE=1 SV=1 - [COX19_HUMAN]	4	3	1		√
P53701	Cytochrome c-type heme lyase OS=Homo sapiens GN=HCCS PE=1 SV=1 - [CCHL_HUMAN]	1	1	3		√
O75462	Cytokine receptor-like factor 1 OS=Homo sapiens GN=CRLF1 PE=1 SV=1 - [CRLF1_HUMAN]	2	3	2		√	√
O43237	Cytoplasmic dynein 1 light intermediate chain 2 OS=Homo sapiens GN=DYNC1LI2 PE=1 SV=1 - [DC1L2_HUMAN]	5	3	5		√
Q8NEM8	Cytosolic carboxypeptidase 3 OS=Homo sapiens GN=AGBL3 PE=2 SV=2 - [CBPC3_HUMAN]	6	4	3		√
Q86XP0	Cytosolic phospholipase A2 delta OS=Homo sapiens GN=PLA2G4D PE=1 SV=2 - [PA24D_HUMAN]	2	3	4	√	√
Q9NYF0	Dapper homolog 1 OS=Homo sapiens GN=DACT1 PE=1 SV=2 - [DACT1_HUMAN]	3	6	6	√	√
Q5IRN2	DAZAP1/MEF2D fusion protein OS=Homo sapiens GN=DAZAP1/MEF2D fusion PE=2 SV=1 - [Q5IRN2_HUMAN]	2	3	1		√
A0SWV8	DAZL (Fragment) OS=Homo sapiens GN=DAZL PE=4 SV=1 - [A0SWV8_HUMAN]	1	1	1	√	√
N0DVX5	DBF4-type zinc finger-containing protein 2 OS=Homo sapiens GN=ZDBF2 PE=1 SV=1 - [N0DVX5_HUMAN]	5	8	11	√
Q5BKZ1	DBIRD complex subunit ZNF326 OS=Homo sapiens GN=ZNF326 PE=1 SV=2 - [ZN326_HUMAN]	3	3	2	√
B3GQE6	DEAD box polypeptide 27 OS=Homo sapiens GN=DDX27 PE=2 SV=1 - [B3GQE6_HUMAN]	7	6	8	√
D3DRH1	Dedicator of cytokinesis 8, isoform CRA_a OS=Homo sapiens GN=DOCK8 PE=3 SV=1 - [D3DRH1_HUMAN]	10	8	4		√
Q96BY6	Dedicator of cytokinesis protein 10 OS=Homo sapiens GN=DOCK10 PE=1 SV=3 - [DOC10_HUMAN]	9	10	12		√
Q9Y3Z3	Deoxynucleoside triphosphate triphosphohydrolase SAMHD1 OS=Homo sapiens GN=SAMHD1 PE=1 SV=2 - [SAMH1_HUMAN]	4	7	4	√
Q08554	Desmocollin-1 OS=Homo sapiens GN=DSC1 PE=1 SV=2 - [DSC1_HUMAN]	3	4	4	√
E9PLX9	Deuterosome assembly protein 1 OS=Homo sapiens GN=DEUP1 PE=1 SV=1 - [E9PLX9_HUMAN]	5	3	3	√	√
B9EGE6	DFNB31 protein OS=Homo sapiens GN=DFNB31 PE=2 SV=1 - [B9EGE6_HUMAN]	4	3	6		√
Q5KSL6	Diacylglycerol kinase kappa OS=Homo sapiens GN=DGKK PE=1 SV=1 - [DGKK_HUMAN]	4	3	5		√
Q13574	Diacylglycerol kinase zeta OS=Homo sapiens GN=DGKZ PE=1 SV=3 - [DGKZ_HUMAN]	3	7	10		√
E9PEI6	Diffuse panbronchiolitis critical region protein 1 OS=Homo sapiens GN=DPCR1 PE=1 SV=1 - [E9PEI6_HUMAN]	8	4	6		√	√
P09417	Dihydropteridine reductase OS=Homo sapiens GN=QDPR PE=1 SV=2 - [DHPR_HUMAN]	1	2	2	√
Q12882	Dihydropyrimidine dehydrogenase [NADP(+)] OS=Homo sapiens GN=DPYD PE=1 SV=2 - [DPYD_HUMAN]	4	5	8		√
P42658	Dipeptidyl aminopeptidase-like protein 6 OS=Homo sapiens GN=DPP6 PE=1 SV=2 - [DPP6_HUMAN]	3	5	6			√
Q8IYB7	DIS3-like exonuclease 2 OS=Homo sapiens GN=DIS3L2 PE=1 SV=4 - [DI3L2_HUMAN]	7	5	6		√
H0Y3A3	Disabled homolog 2-interacting protein (Fragment) OS=Homo sapiens GN=DAB2IP PE=1 SV=1 - [H0Y3A3_HUMAN]	5	6	3		√
A4QMX6	DLGAP3 protein (Fragment) OS=Homo sapiens GN=DLGAP3 PE=2 SV=1 - [A4QMX6_HUMAN]	3	1	5	√		√
Q5FWF4	DNA annealing helicase and endonuclease ZRANB3 OS=Homo sapiens GN=ZRANB3 PE=1 SV=2 - [ZRAB3_HUMAN]	5	7	7		√
Q5T890	DNA excision repair protein ERCC-6-like 2 OS=Homo sapiens GN=ERCC6L2 PE=1 SV=2 - [ER6L2_HUMAN]	4	9	11	√
Q9ULG1	DNA helicase INO80 OS=Homo sapiens GN=INO80 PE=1 SV=2 - [INO80_HUMAN]	8	5	11	√
Q9NXL9	DNA helicase MCM9 OS=Homo sapiens GN=MCM9 PE=1 SV=4 - [MCM9_HUMAN]	4	3	4	√
Q92878	DNA repair protein RAD50 OS=Homo sapiens GN=RAD50 PE=1 SV=1 - [RAD50_HUMAN]	15	11	9	√
P11387	DNA topoisomerase 1 OS=Homo sapiens GN=TOP1 PE=1 SV=2 - [TOP1_HUMAN]	13	15	20	√
Q92547	DNA topoisomerase 2-binding protein 1 OS=Homo sapiens GN=TOPBP1 PE=1 SV=3 - [TOPB1_HUMAN]	6	5	4	√
Q13422	DNA-binding protein Ikaros OS=Homo sapiens GN=IKZF1 PE=1 SV=1 - [IKZF1_HUMAN]	5	7	4	√
P38935	DNA-binding protein SMUBP-2 OS=Homo sapiens GN=IGHMBP2 PE=1 SV=3 - [SMBP2_HUMAN]	6	7	7	√
B4DHJ3	DNA-directed RNA polymerase subunit beta OS=Homo sapiens PE=2 SV=1 - [B4DHJ3_HUMAN]	15	11	10	√
O00411	DNA-directed RNA polymerase, mitochondrial OS=Homo sapiens GN=POLRMT PE=1 SV=2 - [RPOM_HUMAN]	7	4	5	√
Q9H1X3	DnaJ homolog subfamily C member 25 OS=Homo sapiens GN=DNAJC25 PE=1 SV=1 - [DJC25_HUMAN]	1	5	2			√
O60762	Dolichol-phosphate mannosyltransferase subunit 1 OS=Homo sapiens GN=DPM1 PE=1 SV=1 - [DPM1_HUMAN]	3	3	6		√
O60216	Double-strand-break repair protein rad21 homolog OS=Homo sapiens GN=RAD21 PE=1 SV=2 - [RAD21_HUMAN]	3	6	1	√
Q9NS39	Double-stranded RNA-specific editase B2 OS=Homo sapiens GN=ADARB2 PE=1 SV=1 - [RED2_HUMAN]	5	4	4	√
Q6FH34	DRD1 protein (Fragment) OS=Homo sapiens GN=DRD1 PE=2 SV=1 - [Q6FH34_HUMAN]	2	1	3	√	√
Q16643	Drebrin OS=Homo sapiens GN=DBN1 PE=1 SV=4 - [DREB_HUMAN]	3	5	5		√
Q96S53	Dual specificity testis-specific protein kinase 2 OS=Homo sapiens GN=TESK2 PE=1 SV=1 - [TESK2_HUMAN]	6	5	5	√
Q92630	Dual specificity tyrosine-phosphorylation-regulated kinase 2 OS=Homo sapiens GN=DYRK2 PE=1 SV=3 - [DYRK2_HUMAN]	7	8	4		√
Q9NR20	Dual specificity tyrosine-phosphorylation-regulated kinase 4 OS=Homo sapiens GN=DYRK4 PE=1 SV=2 - [DYRK4_HUMAN]	5	4	9		√
H3BUD2	Dynactin subunit 5 OS=Homo sapiens GN=DCTN5 PE=1 SV=1 - [H3BUD2_HUMAN]	1	1	1		√
Q8IVF4	Dynein heavy chain 10, axonemal OS=Homo sapiens GN=DNAH10 PE=1 SV=4 - [DYH10_HUMAN]	14	10	11		√
K7ELN3	Dynein heavy chain 17, axonemal (Fragment) OS=Homo sapiens GN=DNAH17 PE=1 SV=1 - [K7ELN3_HUMAN]	2	4	6		√
Q9C0G6	Dynein heavy chain 6, axonemal OS=Homo sapiens GN=DNAH6 PE=2 SV=3 - [DYH6_HUMAN]	13	13	16		√
Q4LDG9	Dynein light chain 1, axonemal OS=Homo sapiens GN=DNAL1 PE=1 SV=1 - [DNAL1_HUMAN]	3	3	3		√
Q96FJ2	Dynein light chain 2, cytoplasmic OS=Homo sapiens GN=DYNLL2 PE=1 SV=1 - [DYL2_HUMAN]	3	3	3		√
Q5VTU3	Dynein light chain Tctex-type 1 OS=Homo sapiens GN=DYNLT1 PE=1 SV=1 - [Q5VTU3_HUMAN]	1	1	1		√
Q96L91	E1A-binding protein p400 OS=Homo sapiens GN=EP400 PE=1 SV=4 - [EP400_HUMAN]	4	5	9	√
E5RFJ1	E3 SUMO-protein ligase NSE2 OS=Homo sapiens GN=NSMCE2 PE=1 SV=1 - [E5RFJ1_HUMAN]	4	2	2	√
B4DGW0	E3 SUMO-protein ligase PIAS2 OS=Homo sapiens GN=PIAS2 PE=1 SV=1 - [B4DGW0_HUMAN]	3	2	2	√
Q96EP1	E3 ubiquitin-protein ligase CHFR OS=Homo sapiens GN=CHFR PE=1 SV=2 - [CHFR_HUMAN]	4	4	3	√
Q9Y2E6	E3 ubiquitin-protein ligase DTX4 OS=Homo sapiens GN=DTX4 PE=1 SV=2 - [DTX4_HUMAN]	5	5	5	√
Q86Y13	E3 ubiquitin-protein ligase DZIP3 OS=Homo sapiens GN=DZIP3 PE=1 SV=2 - [DZIP3_HUMAN]	4	5	10	√
Q9NTX7	E3 ubiquitin-protein ligase RNF146 OS=Homo sapiens GN=RNF146 PE=1 SV=1 - [RN146_HUMAN]	2	3	2	√
O76064	E3 ubiquitin-protein ligase RNF8 OS=Homo sapiens GN=RNF8 PE=1 SV=1 - [RNF8_HUMAN]	4	4	3	√
Q149N8	E3 ubiquitin-protein ligase SHPRH OS=Homo sapiens GN=SHPRH PE=1 SV=2 - [SHPRH_HUMAN]	11	6	7	√
Q14669	E3 ubiquitin-protein ligase TRIP12 OS=Homo sapiens GN=TRIP12 PE=1 SV=1 - [TRIPC_HUMAN]	14	12	21	√
Q8IWV8	E3 ubiquitin-protein ligase UBR2 OS=Homo sapiens GN=UBR2 PE=1 SV=1 - [UBR2_HUMAN]	3	7	8	√
Q05BV3	Echinoderm microtubule-associated protein-like 5 OS=Homo sapiens GN=EML5 PE=2 SV=3 - [EMAL5_HUMAN]	5	6	7	√
Q9HCE0	Ectopic P granules protein 5 homolog OS=Homo sapiens GN=EPG5 PE=1 SV=2 - [EPG5_HUMAN]	3	5	7	√
Q9NZN3	EH domain-containing protein 3 OS=Homo sapiens GN=EHD3 PE=1 SV=2 - [EHD3_HUMAN]	7	8	6		√
Q15717	ELAV-like protein 1 OS=Homo sapiens GN=ELAVL1 PE=1 SV=2 - [ELAV1_HUMAN]	5	5	6		√
E9PRY8	Elongation factor 1-delta OS=Homo sapiens GN=EEF1D PE=1 SV=1 - [E9PRY8_HUMAN]	5	5	5		√
P49411	Elongation factor Tu, mitochondrial OS=Homo sapiens GN=TUFM PE=1 SV=2 - [EFTU_HUMAN]	5	6	6		√
Q9H9T3	Elongator complex protein 3 OS=Homo sapiens GN=ELP3 PE=1 SV=2 - [ELP3_HUMAN]	6	5	6		√
Q67BC3	Endogenous granzyme B OS=Homo sapiens PE=2 SV=1 - [Q67BC3_HUMAN]	1	4	1		√
Q8N909	Endoglucanase OS=Homo sapiens PE=2 SV=1 - [Q8N909_HUMAN]	3	2	1		√
Q7L9B9	Endonuclease/exonuclease/phosphatase family domain-containing protein 1 OS=Homo sapiens GN=EEPD1 PE=1 SV=2 - [EEPD1_HUMAN]	3	3	3		√
E7ER77	Endoplasmic reticulum metallopeptidase 1 OS=Homo sapiens GN=ERMP1 PE=1 SV=1 - [E7ER77_HUMAN]	6	4	9		√
P30040	Endoplasmic reticulum resident protein 29 OS=Homo sapiens GN=ERP29 PE=1 SV=4 - [ERP29_HUMAN]	4	4	5		√
S4R329	ER membrane protein complex subunit 4 OS=Homo sapiens GN=EMC4 PE=1 SV=1 - [S4R329_HUMAN]	2	2	3		√
Q9BV81	ER membrane protein complex subunit 6 OS=Homo sapiens GN=EMC6 PE=1 SV=1 - [EMC6_HUMAN]	1	1	1		√
Q96HE7	ERO1-like protein alpha OS=Homo sapiens GN=ERO1A PE=1 SV=2 - [ERO1A_HUMAN]	2	3	3		√
Q3B7T1	Erythroid differentiation-related factor 1 OS=Homo sapiens GN=EDRF1 PE=1 SV=1 - [EDRF1_HUMAN]	5	5	6		√
H3BR35	Eukaryotic peptide chain release factor GTP-binding subunit ERF3A (Fragment) OS=Homo sapiens GN=GSPT1 PE=1 SV=1 - [H3BR35_HUMAN]	15	12	10		√
Q59GZ3	Eukaryotic translation initiation factor 2 beta variant (Fragment) OS=Homo sapiens PE=2 SV=1 - [Q59GZ3_HUMAN]	1	1	1		√
Q6ZNE1	Eukaryotic translation initiation factor 3 subunit A OS=Homo sapiens GN=EIF3A PE=2 SV=1 - [Q6ZNE1_HUMAN]	5	5	3		√
B4DVU3	Eukaryotic translation initiation factor 3 subunit C OS=Homo sapiens GN=EIF3C PE=2 SV=1 - [B4DVU3_HUMAN]	24	21	20		√
E7EX73	Eukaryotic translation initiation factor 4 gamma 1 OS=Homo sapiens GN=EIF4G1 PE=1 SV=1 - [E7EX73_HUMAN]	21	20	19		√
Q9NY74	Ewing's tumor-associated antigen 1 OS=Homo sapiens GN=ETAA1 PE=1 SV=2 - [ETAA1_HUMAN]	4	5	6		√
Q9Y2D4	Exocyst complex component 6B OS=Homo sapiens GN=EXOC6B PE=1 SV=3 - [EXC6B_HUMAN]	4	3	3		√
Q01780	Exosome component 10 OS=Homo sapiens GN=EXOSC10 PE=1 SV=2 - [EXOSX_HUMAN]	6	6	3		√
F2Z2X4	Exportin-4 OS=Homo sapiens GN=XPO4 PE=1 SV=1 - [F2Z2X4_HUMAN]	4	4	5	√	√
Q86XX4	Extracellular matrix protein FRAS1 OS=Homo sapiens GN=FRAS1 PE=1 SV=2 - [FRAS1_HUMAN]	6	3	5	√
Q9BXW9	Fanconi anemia group D2 protein OS=Homo sapiens GN=FANCD2 PE=1 SV=2 - [FACD2_HUMAN]	4	3	5	√
Q16658	Fascin OS=Homo sapiens GN=FSCN1 PE=1 SV=3 - [FSCN1_HUMAN]	6	8	9		√
Q0JRZ9	F-BAR domain only protein 2 OS=Homo sapiens GN=FCHO2 PE=1 SV=2 - [FCHO2_HUMAN]	3	3	2		√
Q969P5	F-box only protein 32 OS=Homo sapiens GN=FBXO32 PE=1 SV=1 - [FBX32_HUMAN]	3	4	2		√
Q6PIJ6	F-box only protein 38 OS=Homo sapiens GN=FBXO38 PE=1 SV=3 - [FBX38_HUMAN]	3	4	4		√
Q8TF61	F-box only protein 41 OS=Homo sapiens GN=FBXO41 PE=2 SV=5 - [FBX41_HUMAN]	4	2	8		√
H7C112	F-box/LRR-repeat protein 19 (Fragment) OS=Homo sapiens GN=FBXL19 PE=1 SV=1 - [H7C112_HUMAN]	7	3	5		√
Q2NNQ8	FER-1-like protein 4 OS=Homo sapiens GN=FER1L4 PE=2 SV=1 - [Q2NNQ8_HUMAN]	5	5	11	√
Q2WGJ9	Fer-1-like protein 6 OS=Homo sapiens GN=FER1L6 PE=2 SV=2 - [FR1L6_HUMAN]	10	4	9	√
H0YJ34	Fermitin family homolog 2 (Fragment) OS=Homo sapiens GN=FERMT2 PE=1 SV=1 - [H0YJ34_HUMAN]	8	5	7		√
Q9Y613	FH1/FH2 domain-containing protein 1 OS=Homo sapiens GN=FHOD1 PE=1 SV=3 - [FHOD1_HUMAN]	9	3	4		√
P35555	Fibrillin-1 OS=Homo sapiens GN=FBN1 PE=1 SV=3 - [FBN1_HUMAN]	5	2	5	√	√	√
P61328	Fibroblast growth factor 12 OS=Homo sapiens GN=FGF12 PE=1 SV=1 - [FGF12_HUMAN]	5	6	4	√
E2I6F9	Fibroblast growth factor receptor 2 variant (Fragment) OS=Homo sapiens GN=FGFR2 PE=2 SV=1 - [E2I6F9_HUMAN]	1	2	4	√	√	√
Q86WI1	Fibrocystin-L OS=Homo sapiens GN=PKHD1L1 PE=2 SV=2 - [PKHL1_HUMAN]	6	6	6		√	√
P02751	Fibronectin OS=Homo sapiens GN=FN1 PE=1 SV=4 - [FINC_HUMAN]	38	34	38		√	√
Q6FG43	FLOT2 protein OS=Homo sapiens GN=FLOT2 PE=2 SV=1 - [Q6FG43_HUMAN]	12	15	11	√	√	√
Q6FIG5	FN3KRP protein OS=Homo sapiens GN=FN3KRP PE=2 SV=1 - [Q6FIG5_HUMAN]	2	2	2		√
D3DSM8	Formiminotransferase cyclodeaminase, isoform CRA_a OS=Homo sapiens GN=FTCD PE=4 SV=1 - [D3DSM8_HUMAN]	2	2	4		√
H0YM30	Formin-1 OS=Homo sapiens GN=FMN1 PE=1 SV=1 - [H0YM30_HUMAN]	8	5	4	√
O95466	Formin-like protein 1 OS=Homo sapiens GN=FMNL1 PE=1 SV=3 - [FMNL1_HUMAN]	7	7	4	√
F8W1F5	Formin-like protein 3 OS=Homo sapiens GN=FMNL3 PE=1 SV=1 - [F8W1F5_HUMAN]	7	10	10	√
Q5SZK8	FRAS1-related extracellular matrix protein 2 OS=Homo sapiens GN=FREM2 PE=1 SV=2 - [FREM2_HUMAN]	5	5	2		√	√
Q6ZNL6	FYVE, RhoGEF and PH domain-containing protein 5 OS=Homo sapiens GN=FGD5 PE=1 SV=3 - [FGD5_HUMAN]	6	6	11		√
Q7Z2K8	G protein-regulated inducer of neurite outgrowth 1 OS=Homo sapiens GN=GPRIN1 PE=1 SV=2 - [GRIN1_HUMAN]	13	14	12	√		√
Q5T8J1	G1/S-specific cyclin-D3 OS=Homo sapiens GN=CCND3 PE=1 SV=1 - [Q5T8J1_HUMAN]	3	2	3	√	√
O60755	Galanin receptor type 3 OS=Homo sapiens GN=GALR3 PE=1 SV=1 - [GALR3_HUMAN]	3	2	3			√
P47929	Galectin-7 OS=Homo sapiens GN=LGALS7 PE=1 SV=2 - [LEG7_HUMAN]	1	1	1		√
Q9NUQ3	Gamma-taxilin OS=Homo sapiens GN=TXLNG PE=1 SV=2 - [TXLNG_HUMAN]	3	7	4	√
Q96KN9	Gap junction delta-4 protein OS=Homo sapiens GN=GJD4 PE=2 SV=1 - [CXD4_HUMAN]	4	2	2			√
A0A5E8	GAS2-like protein 1 OS=Homo sapiens GN=GAS2L1 PE=1 SV=1 - [A0A5E8_HUMAN]	6	5	4		√
Q5JTV1	Glucocorticoid modulatory element binding protein 2, isoform CRA_a OS=Homo sapiens GN=GMEB2 PE=1 SV=1 - [Q5JTV1_HUMAN]	2	2	3	√
Q8TDV5	Glucose-dependent insulinotropic receptor OS=Homo sapiens GN=GPR119 PE=1 SV=1 - [GP119_HUMAN]	2	2	1			√
P49448	Glutamate dehydrogenase 2, mitochondrial OS=Homo sapiens GN=GLUD2 PE=1 SV=2 - [DHE4_HUMAN]	8	7	11		√
O15399	Glutamate receptor ionotropic, NMDA 2D OS=Homo sapiens GN=GRIN2D PE=1 SV=2 - [NMDE4_HUMAN]	3	4	6		√	√
B0BCY7	Glutamyl aminopeptidase (Aminopeptidase A) OS=Homo sapiens GN=ENPEP PE=2 SV=1 - [B0BCY7_HUMAN]	3	3	4		√	√
Q86UL3	Glycerol-3-phosphate acyltransferase 4 OS=Homo sapiens GN=GPAT4 PE=1 SV=1 - [GPAT4_HUMAN]	2	3	4		√
Q96HI4	Glycylpeptide N-tetradecanoyltransferase (Fragment) OS=Homo sapiens GN=NMT1 PE=2 SV=2 - [Q96HI4_HUMAN]	6	4	4		√
G3V0G1	Golgi reassembly stacking protein 1, 65kDa, isoform CRA_d OS=Homo sapiens GN=GORASP1 PE=1 SV=1 - [G3V0G1_HUMAN]	2	1	2		√
I6L899	Golgin subfamily A member 8R OS=Homo sapiens GN=GOLGA8R PE=3 SV=1 - [GOG8R_HUMAN]	3	4	5		√
Q8WXG9	G-protein coupled receptor 98 OS=Homo sapiens GN=GPR98 PE=1 SV=2 - [GPR98_HUMAN]	8	9	10	√		√
Q6IC98	GRAM domain-containing protein 4 OS=Homo sapiens GN=GRAMD4 PE=1 SV=1 - [GRAM4_HUMAN]	4	2	3		√
H8Y6P7	GRINL1A combined protein 15 OS=Homo sapiens GN=GCOM1 PE=2 SV=1 - [H8Y6P7_HUMAN]	4	5	5		√
Q8TAE8	Growth arrest and DNA damage-inducible proteins-interacting protein 1 OS=Homo sapiens GN=GADD45GIP1 PE=1 SV=1 - [G45IP_HUMAN]	2	2	4	√
F1T0J1	Growth/differentiation factor 5 OS=Homo sapiens GN=GDF5 PE=2 SV=1 - [F1T0J1_HUMAN]	2	2	5	√		√
P01112	GTPase HRas OS=Homo sapiens GN=HRAS PE=1 SV=1 - [RASH_HUMAN]	6	8	4		√	√
Q8ND71	GTPase IMAP family member 8 OS=Homo sapiens GN=GIMAP8 PE=2 SV=2 - [GIMA8_HUMAN]	7	8	8		√
Q14344	Guanine nucleotide-binding protein subunit alpha-13 OS=Homo sapiens GN=GNA13 PE=1 SV=2 - [GNA13_HUMAN]	5	5	5	√	√	√
D3DT27	Guanylate binding protein 4, isoform CRA_a OS=Homo sapiens GN=GBP4 PE=4 SV=1 - [D3DT27_HUMAN]	4	6	3		√
Q68CZ6	HAUS augmin-like complex subunit 3 OS=Homo sapiens GN=HAUS3 PE=1 SV=1 - [HAUS3_HUMAN]	4	4	5		√
Q8N241	Heat shock 27kDa protein family, member 7 (Cardiovascular), isoform CRA_c OS=Homo sapiens GN=HSPB7 PE=1 SV=1 - [Q8N241_HUMAN]	4	1	1		√
F8WE04	Heat shock protein beta-1 OS=Homo sapiens GN=HSPB1 PE=1 SV=1 - [F8WE04_HUMAN]	3	2	3		√
A4D1V5	HECT type E3 ubiquitin ligase OS=Homo sapiens GN=NEDL1 PE=4 SV=1 - [A4D1V5_HUMAN]	8	5	11		√
E7BJU4	Heme oxygenase 1 (Fragment) OS=Homo sapiens GN=HO1 PE=2 SV=1 - [E7BJU4_HUMAN]	2	2	2		√
Q8NDA2	Hemicentin-2 OS=Homo sapiens GN=HMCN2 PE=2 SV=3 - [HMCN2_HUMAN]	9	10	12	√	√	√
Q9Y661	Heparan sulfate glucosamine 3-O-sulfotransferase 4 OS=Homo sapiens GN=HS3ST4 PE=2 SV=3 - [HS3S4_HUMAN]	3	3	2		√
Q68CP4	Heparan-alpha-glucosaminide N-acetyltransferase OS=Homo sapiens GN=HGSNAT PE=1 SV=2 - [HGNAT_HUMAN]	2	1	1		√	√
P08581	Hepatocyte growth factor receptor OS=Homo sapiens GN=MET PE=1 SV=4 - [MET_HUMAN]	6	3	5	√
D6R9P3	Heterogeneous nuclear ribonucleoprotein A/B OS=Homo sapiens GN=HNRNPAB PE=1 SV=1 - [D6R9P3_HUMAN]	7	6	3	√
F8W6I7	Heterogeneous nuclear ribonucleoprotein A1 OS=Homo sapiens GN=HNRNPA1 PE=1 SV=2 - [F8W6I7_HUMAN]	9	7	9	√
P51991	Heterogeneous nuclear ribonucleoprotein A3 OS=Homo sapiens GN=HNRNPA3 PE=1 SV=2 - [ROA3_HUMAN]	15	12	13	√	√
J3KS46	Hexosaminidase D (Fragment) OS=Homo sapiens GN=HEXDC PE=4 SV=2 - [J3KS46_HUMAN]	1	1	1	√	√
Q499Z2	Hexosyltransferase (Fragment) OS=Homo sapiens GN=B3GALT6 PE=2 SV=1 - [Q499Z2_HUMAN]	2	1	3	√	√
Q5T6U8	High mobility group AT-hook 1 OS=Homo sapiens GN=HMGA1 PE=2 SV=1 - [Q5T6U8_HUMAN]	2	1	1	√
Q92794	Histone acetyltransferase KAT6A OS=Homo sapiens GN=KAT6A PE=1 SV=2 - [KAT6A_HUMAN]	5	6	7		√
P16402	Histone H1.3 OS=Homo sapiens GN=HIST1H1D PE=1 SV=2 - [H13_HUMAN]	10	10	10	√
Q8IZA3	Histone H1oo OS=Homo sapiens GN=H1FOO PE=2 SV=1 - [H1FOO_HUMAN]	4	7	4	√
Q5VVJ2	Histone H2A deubiquitinase MYSM1 OS=Homo sapiens GN=MYSM1 PE=1 SV=1 - [MYSM1_HUMAN]	9	5	6	√
D6RCF2	Histone H2A OS=Homo sapiens GN=H2AFY PE=1 SV=1 - [D6RCF2_HUMAN]	2	1	2	√
P04908	Histone H2A type 1-B/E OS=Homo sapiens GN=HIST1H2AB PE=1 SV=2 - [H2A1B_HUMAN]	5	4	6	√
P0C0S5	Histone H2A.Z OS=Homo sapiens GN=H2AFZ PE=1 SV=2 - [H2AZ_HUMAN]	4	3	3	√
P0C5Y9	Histone H2A-Bbd type 1 OS=Homo sapiens GN=H2AFB1 PE=2 SV=1 - [H2AB1_HUMAN]	1	1	3	√
E9PRF4	Histone-lysine N-methyltransferase (Fragment) OS=Homo sapiens GN=SETDB1 PE=1 SV=1 - [E9PRF4_HUMAN]	5	3	10	√
Q03164	Histone-lysine N-methyltransferase 2A OS=Homo sapiens GN=KMT2A PE=1 SV=5 - [KMT2A_HUMAN]	17	17	24	√
H0Y765	Histone-lysine N-methyltransferase 2C (Fragment) OS=Homo sapiens GN=KMT2C PE=1 SV=1 - [H0Y765_HUMAN]	6	4	7	√
Q9BYW2	Histone-lysine N-methyltransferase SETD2 OS=Homo sapiens GN=SETD2 PE=1 SV=3 - [SETD2_HUMAN]	9	7	10	√
Q86TU7	Histone-lysine N-methyltransferase setd3 OS=Homo sapiens GN=SETD3 PE=1 SV=1 - [SETD3_HUMAN]	6	2	8	√
P39880	Homeobox protein cut-like 1 OS=Homo sapiens GN=CUX1 PE=1 SV=3 - [CUX1_HUMAN]	10	5	11		√
O14529	Homeobox protein cut-like 2 OS=Homo sapiens GN=CUX2 PE=1 SV=4 - [CUX2_HUMAN]	11	7	7	√
O43248	Homeobox protein Hox-C11 OS=Homo sapiens GN=HOXC11 PE=1 SV=1 - [HXC11_HUMAN]	2	1	3	√
Q9P2W1	Homologous-pairing protein 2 homolog OS=Homo sapiens GN=PSMC3IP PE=1 SV=1 - [HOP2_HUMAN]	2	2	4	√	√
Q8N7B1	HORMA domain-containing protein 2 OS=Homo sapiens GN=HORMAD2 PE=1 SV=2 - [HORM2_HUMAN]	4	4	2	√
O00291	Huntingtin-interacting protein 1 OS=Homo sapiens GN=HIP1 PE=1 SV=5 - [HIP1_HUMAN]	9	5	8	√	√
Q4G0P3	Hydrocephalus-inducing protein homolog OS=Homo sapiens GN=HYDIN PE=1 SV=3 - [HYDIN_HUMAN]	13	8	15		√
Q6WRI0	Immunoglobulin superfamily member 10 OS=Homo sapiens GN=IGSF10 PE=2 SV=1 - [IGS10_HUMAN]	4	5	7	√		√
Q8N9C0	Immunoglobulin superfamily member 22 OS=Homo sapiens GN=IGSF22 PE=2 SV=2 - [IGS22_HUMAN]	5	3	4	√	√
O15397	Importin-8 OS=Homo sapiens GN=IPO8 PE=1 SV=2 - [IPO8_HUMAN]	3	3	3	√	√
Q6ZVT0	Inactive polyglycylase TTLL10 OS=Homo sapiens GN=TTLL10 PE=1 SV=2 - [TTL10_HUMAN]	3	4	3	√	√
Q8IWB6	Inactive serine/threonine-protein kinase TEX14 OS=Homo sapiens GN=TEX14 PE=1 SV=2 - [TEX14_HUMAN]	5	2	5		√
Q9UKX5	Integrin alpha-11 OS=Homo sapiens GN=ITGA11 PE=1 SV=2 - [ITA11_HUMAN]	6	5	1		√	√
Q13797	Integrin alpha-9 OS=Homo sapiens GN=ITGA9 PE=1 SV=2 - [ITA9_HUMAN]	4	3	5		√	√
Q13418	Integrin-linked protein kinase OS=Homo sapiens GN=ILK PE=1 SV=2 - [ILK_HUMAN]	6	3	9	√	√	√
Q6UXX5	Inter-alpha-trypsin inhibitor heavy chain H6 OS=Homo sapiens GN=ITIH6 PE=2 SV=1 - [ITIH6_HUMAN]	4	2	3		√	√
Q5TFD1	Interferon gamma receptor 1 (Fragment) OS=Homo sapiens GN=IFNGR1 PE=1 SV=1 - [Q5TFD1_HUMAN]	1	1	1		√	√
Q7Z5L9	Interferon regulatory factor 2-binding protein 2 OS=Homo sapiens GN=IRF2BP2 PE=1 SV=2 - [I2BP2_HUMAN]	1	3	4	√
Q9H1B7	Interferon regulatory factor 2-binding protein-like OS=Homo sapiens GN=IRF2BPL PE=1 SV=1 - [I2BPL_HUMAN]	6	3	6	√
X5CHT4	Interferon regulatory factor OS=Homo sapiens GN=IRF-1 PE=2 SV=1 - [X5CHT4_HUMAN]	3	2	3	√
P29460	Interleukin-12 subunit beta OS=Homo sapiens GN=IL12B PE=1 SV=1 - [IL12B_HUMAN]	3	1	2		√	√
Q9UG01	Intraflagellar transport protein 172 homolog OS=Homo sapiens GN=IFT172 PE=1 SV=2 - [IF172_HUMAN]	5	3	6	√	√	√
Q8N2Y8	Iporin OS=Homo sapiens GN=RUSC2 PE=1 SV=3 - [RUSC2_HUMAN]	6	5	8		√
A6NCM1	IQ and AAA domain-containing protein 1-like OS=Homo sapiens GN=IQCA1L PE=3 SV=2 - [IQCAL_HUMAN]	6	3	4		√
Q9UKU7	Isobutyryl-CoA dehydrogenase, mitochondrial OS=Homo sapiens GN=ACAD8 PE=1 SV=1 - [ACAD8_HUMAN]	2	2	3		√
O43837	Isocitrate dehydrogenase [NAD] subunit beta, mitochondrial OS=Homo sapiens GN=IDH3B PE=1 SV=2 - [IDH3B_HUMAN]	4	3	4		√
Q8N157	Jouberin OS=Homo sapiens GN=AHI1 PE=1 SV=1 - [AHI1_HUMAN]	4	5	7		√
Q96PT1	Kallikrein 4 splice variant OS=Homo sapiens GN=KLK4 PE=3 SV=1 - [Q96PT1_HUMAN]	1	1	1	√	√	√
B2RDY3	Katanin p60 ATPase-containing subunit A-like 1 OS=Homo sapiens GN=KATNAL1 PE=2 SV=1 - [B2RDY3_HUMAN]	7	3	3		√
Q96M94	Kelch-like protein 15 OS=Homo sapiens GN=KLHL15 PE=1 SV=2 - [KLH15_HUMAN]	2	2	3		√
A4D1S0	Killer cell lectin-like receptor subfamily G member 2 OS=Homo sapiens GN=KLRG2 PE=1 SV=3 - [KLRG2_HUMAN]	2	3	3	√	√	√
Q9ULH0	Kinase D-interacting substrate of 220 kDa OS=Homo sapiens GN=KIDINS220 PE=1 SV=3 - [KDIS_HUMAN]	2	3	7	√	√	√
O75037	Kinesin-like protein KIF21B OS=Homo sapiens GN=KIF21B PE=1 SV=2 - [KI21B_HUMAN]	9	6	11		√
Q14807	Kinesin-like protein KIF22 OS=Homo sapiens GN=KIF22 PE=1 SV=5 - [KIF22_HUMAN]	5	5	6		√
Q5T7B8	Kinesin-like protein KIF24 OS=Homo sapiens GN=KIF24 PE=1 SV=2 - [KIF24_HUMAN]	4	4	5		√
B7ZC32	Kinesin-like protein KIF28P OS=Homo sapiens GN=KIF28P PE=3 SV=2 - [KIF28_HUMAN]	6	6	9		√
Q9Y496	Kinesin-like protein KIF3A OS=Homo sapiens GN=KIF3A PE=1 SV=4 - [KIF3A_HUMAN]	5	6	9		√
Q2M1P5	Kinesin-like protein KIF7 OS=Homo sapiens GN=KIF7 PE=1 SV=2 - [KIF7_HUMAN]	8	11	7		√
Q96AC6	Kinesin-like protein KIFC2 OS=Homo sapiens GN=KIFC2 PE=2 SV=1 - [KIFC2_HUMAN]	6	9	4		√
B7Z2M7	Kinesin-like protein OS=Homo sapiens PE=2 SV=1 - [B7Z2M7_HUMAN]	12	5	10		√
Q9HBM1	Kinetochore protein Spc25 OS=Homo sapiens GN=SPC25 PE=1 SV=1 - [SPC25_HUMAN]	4	2	4		√
O15230	Laminin subunit alpha-5 OS=Homo sapiens GN=LAMA5 PE=1 SV=8 - [LAMA5_HUMAN]	6	12	8	√		√
A4D0S4	Laminin subunit beta-4 OS=Homo sapiens GN=LAMB4 PE=2 SV=1 - [LAMB4_HUMAN]	9	5	4	√	√	√
Q9C099	Leucine-rich repeat and coiled-coil domain-containing protein 1 OS=Homo sapiens GN=LRRCC1 PE=1 SV=2 - [LRCC1_HUMAN]	8	4	8		√
Q9Y608	Leucine-rich repeat flightless-interacting protein 2 OS=Homo sapiens GN=LRRFIP2 PE=1 SV=1 - [LRRF2_HUMAN]	5	3	7		√
O75325	Leucine-rich repeat neuronal protein 2 OS=Homo sapiens GN=LRRN2 PE=2 SV=2 - [LRRN2_HUMAN]	3	3	4		√
Q1X8D7	Leucine-rich repeat-containing protein 36 OS=Homo sapiens GN=LRRC36 PE=2 SV=2 - [LRC36_HUMAN]	3	5	2		√
Q9H9A6	Leucine-rich repeat-containing protein 40 OS=Homo sapiens GN=LRRC40 PE=1 SV=1 - [LRC40_HUMAN]	6	3	4		√
Q5T3J3	Ligand-dependent nuclear receptor-interacting factor 1 OS=Homo sapiens GN=LRIF1 PE=1 SV=1 - [LRIF1_HUMAN]	5	1	6	√	√
Q13136	Liprin-alpha-1 OS=Homo sapiens GN=PPFIA1 PE=1 SV=1 - [LIPA1_HUMAN]	7	5	9		√
O75145	Liprin-alpha-3 OS=Homo sapiens GN=PPFIA3 PE=1 SV=3 - [LIPA3_HUMAN]	8	11	12		√
Q9Y2F5	Little elongation complex subunit 1 OS=Homo sapiens GN=ICE1 PE=1 SV=5 - [ICE1_HUMAN]	7	3	9		√
Q659A1	Little elongation complex subunit 2 OS=Homo sapiens GN=ICE2 PE=1 SV=2 - [ICE2_HUMAN]	7	2	6		√
K7EJE8	Lon protease homolog, mitochondrial OS=Homo sapiens GN=LONP1 PE=1 SV=1 - [K7EJE8_HUMAN]	13	10	11		√
P28330	Long-chain specific acyl-CoA dehydrogenase, mitochondrial OS=Homo sapiens GN=ACADL PE=1 SV=2 - [ACADL_HUMAN]	3	3	2		√
O60488	Long-chain-fatty-acid--CoA ligase 4 OS=Homo sapiens GN=ACSL4 PE=1 SV=2 - [ACSL4_HUMAN]	6	7	7		√
O75197	Low-density lipoprotein receptor-related protein 5 OS=Homo sapiens GN=LRP5 PE=1 SV=2 - [LRP5_HUMAN]	8	7	2		√	√
O75164	Lysine-specific demethylase 4A OS=Homo sapiens GN=KDM4A PE=1 SV=2 - [KDM4A_HUMAN]	6	3	8	√
Q6B0I6	Lysine-specific demethylase 4D OS=Homo sapiens GN=KDM4D PE=1 SV=3 - [KDM4D_HUMAN]	4	2	2	√
Q9UGL1	Lysine-specific demethylase 5B OS=Homo sapiens GN=KDM5B PE=1 SV=3 - [KDM5B_HUMAN]	9	8	10	√
Q9BY66	Lysine-specific demethylase 5D OS=Homo sapiens GN=KDM5D PE=1 SV=2 - [KDM5D_HUMAN]	7	6	7	√
E9PHY8	Maestro heat-like repeat-containing protein family member 1 OS=Homo sapiens GN=MROH1 PE=1 SV=1 - [E9PHY8_HUMAN]	2	3	4	√
A6NES4	Maestro heat-like repeat-containing protein family member 2A OS=Homo sapiens GN=MROH2A PE=4 SV=4 - [MRO2A_HUMAN]	8	6	7	√
A6NGR9	Maestro heat-like repeat-containing protein family member 6 OS=Homo sapiens GN=MROH6 PE=4 SV=2 - [MROH6_HUMAN]	3	5	4	√
P07199	Major centromere autoantigen B OS=Homo sapiens GN=CENPB PE=1 SV=2 - [CENPB_HUMAN]	3	3	4	√
F5H1S8	Malectin (Fragment) OS=Homo sapiens GN=MLEC PE=1 SV=1 - [F5H1S8_HUMAN]	4	2	3		√
H3BN01	Mannose-6-phosphate isomerase (Fragment) OS=Homo sapiens GN=MPI PE=1 SV=1 - [H3BN01_HUMAN]	1	1	1		√
B7ZMI1	MED12L protein OS=Homo sapiens GN=MED12L PE=2 SV=1 - [B7ZMI1_HUMAN]	10	4	12	√
Q14676	Mediator of DNA damage checkpoint protein 1 OS=Homo sapiens GN=MDC1 PE=1 SV=3 - [MDC1_HUMAN]	6	14	7	√
Q5TIA1	Meiosis inhibitor protein 1 OS=Homo sapiens GN=MEI1 PE=2 SV=2 - [MEI1_HUMAN]	2	3	3	√
Q9HAY2	Melanoma-associated antigen F1 OS=Homo sapiens GN=MAGEF1 PE=1 SV=2 - [MAGF1_HUMAN]	3	4	5	√	√
B7ZKY6	Membrane metallo-endopeptidase OS=Homo sapiens GN=MME PE=2 SV=1 - [B7ZKY6_HUMAN]	3	3	4	√		√
Q13255	Metabotropic glutamate receptor 1 OS=Homo sapiens GN=GRM1 PE=1 SV=3 - [GRM1_HUMAN]	7	3	3	√		√
Q9NRU3	Metal transporter CNNM1 OS=Homo sapiens GN=CNNM1 PE=1 SV=3 - [CNNM1_HUMAN]	4	3	2		√	√
Q9H8M5	Metal transporter CNNM2 OS=Homo sapiens GN=CNNM2 PE=1 SV=2 - [CNNM2_HUMAN]	2	3	4			√
Q9P267	Methyl-CpG-binding domain protein 5 OS=Homo sapiens GN=MBD5 PE=1 SV=3 - [MBD5_HUMAN]	7	3	8	√
Q8NFU7	Methylcytosine dioxygenase TET1 OS=Homo sapiens GN=TET1 PE=1 SV=2 - [TET1_HUMAN]	9	10	9	√
Q6N021	Methylcytosine dioxygenase TET2 OS=Homo sapiens GN=TET2 PE=1 SV=3 - [TET2_HUMAN]	8	5	5	√
Q9H3L0	Methylmalonic aciduria and homocystinuria type D protein, mitochondrial OS=Homo sapiens GN=MMADHC PE=1 SV=2 - [MMAD_HUMAN]	1	1	1		√
H3BTS9	Methyltransferase-like protein 9 OS=Homo sapiens GN=METTL9 PE=1 SV=1 - [H3BTS9_HUMAN]	1	2	2	√
Q8IY33	MICAL-like protein 2 OS=Homo sapiens GN=MICALL2 PE=1 SV=1 - [MILK2_HUMAN]	4	5	7		√
P55157	Microsomal triglyceride transfer protein large subunit OS=Homo sapiens GN=MTTP PE=1 SV=1 - [MTP_HUMAN]	4	3	3		√
P11137	Microtubule-associated protein 2 OS=Homo sapiens GN=MAP2 PE=1 SV=4 - [MTAP2_HUMAN]	8	13	9		√
F8W9U4	Microtubule-associated protein OS=Homo sapiens GN=MAP4 PE=1 SV=1 - [F8W9U4_HUMAN]	11	10	10		√
P62072	Mitochondrial import inner membrane translocase subunit Tim10 OS=Homo sapiens GN=TIMM10 PE=1 SV=1 - [TIM10_HUMAN]	1	2	2		√
Q99797	Mitochondrial intermediate peptidase OS=Homo sapiens GN=MIPEP PE=1 SV=2 - [MIPEP_HUMAN]	2	2	4		√
Q8IXI2	Mitochondrial Rho GTPase 1 OS=Homo sapiens GN=RHOT1 PE=1 SV=2 - [MIRO1_HUMAN]	6	6	9		√
Q96A46	Mitoferrin-2 OS=Homo sapiens GN=SLC25A28 PE=2 SV=1 - [MFRN2_HUMAN]	2	2	2		√
Q15759	Mitogen-activated protein kinase 11 OS=Homo sapiens GN=MAPK11 PE=1 SV=2 - [MK11_HUMAN]	2	4	2	√
Q13164	Mitogen-activated protein kinase 7 OS=Homo sapiens GN=MAPK7 PE=1 SV=2 - [MK07_HUMAN]	4	3	4	√
B4DFY5	Mitogen-activated protein kinase kinase 1, isoform CRA_d OS=Homo sapiens GN=MAP2K1 PE=2 SV=1 - [B4DFY5_HUMAN]	2	3	3	√
Q13233	Mitogen-activated protein kinase kinase kinase 1 OS=Homo sapiens GN=MAP3K1 PE=1 SV=4 - [M3K1_HUMAN]	3	5	3	√
O60566	Mitotic checkpoint serine/threonine-protein kinase BUB1 beta OS=Homo sapiens GN=BUB1B PE=1 SV=3 - [BUB1B_HUMAN]	9	5	3	√	√
Q96T76	MMS19 nucleotide excision repair protein homolog OS=Homo sapiens GN=MMS19 PE=1 SV=2 - [MMS19_HUMAN]	3	2	4	√
B7ZM73	MON2 protein OS=Homo sapiens GN=MON2 PE=2 SV=1 - [B7ZM73_HUMAN]	8	2	7	√
Q6UB35	Monofunctional C1-tetrahydrofolate synthase, mitochondrial OS=Homo sapiens GN=MTHFD1L PE=1 SV=1 - [C1TM_HUMAN]	12	12	13		√
D3DR32	M-phase phosphoprotein 1, isoform CRA_a OS=Homo sapiens GN=MPHOSPH1 PE=3 SV=1 - [D3DR32_HUMAN]	17	10	11	√
Q99549	M-phase phosphoprotein 8 OS=Homo sapiens GN=MPHOSPH8 PE=1 SV=2 - [MPP8_HUMAN]	5	2	4	√
Q8IW90	MTCH1 protein (Fragment) OS=Homo sapiens GN=MTCH1 PE=2 SV=2 - [Q8IW90_HUMAN]	6	2	4		√
Q86VL8	Multidrug and toxin extrusion protein 2 OS=Homo sapiens GN=SLC47A2 PE=1 SV=1 - [S47A2_HUMAN]	3	1	3			√
Q96J65	Multidrug resistance-associated protein 9 OS=Homo sapiens GN=ABCC12 PE=1 SV=2 - [MRP9_HUMAN]	4	5	6		√	√
Q7Z7M0	Multiple epidermal growth factor-like domains protein 8 OS=Homo sapiens GN=MEGF8 PE=1 SV=2 - [MEGF8_HUMAN]	7	5	6	√
O15457	MutS protein homolog 4 OS=Homo sapiens GN=MSH4 PE=1 SV=2 - [MSH4_HUMAN]	2	4	6		√
E9PL24	Myomegalin OS=Homo sapiens GN=PDE4DIP PE=1 SV=2 - [E9PL24_HUMAN]	8	4	3		√
P11055	Myosin-3 OS=Homo sapiens GN=MYH3 PE=1 SV=3 - [MYH3_HUMAN]	10	9	14		√
Q9Y623	Myosin-4 OS=Homo sapiens GN=MYH4 PE=2 SV=2 - [MYH4_HUMAN]	18	9	12		√
Q8NEV4	Myosin-IIIa OS=Homo sapiens GN=MYO3A PE=2 SV=2 - [MYO3A_HUMAN]	8	5	7		√
Q56NI9	N-acetyltransferase ESCO2 OS=Homo sapiens GN=ESCO2 PE=1 SV=1 - [ESCO2_HUMAN]	4	3	3	√
P59044	NACHT, LRR and PYD domains-containing protein 6 OS=Homo sapiens GN=NLRP6 PE=1 SV=2 - [NLRP6_HUMAN]	3	3	4		√
Q7RTR0	NACHT, LRR and PYD domains-containing protein 9 OS=Homo sapiens GN=NLRP9 PE=2 SV=1 - [NALP9_HUMAN]	6	4	6		√
P23368	NAD-dependent malic enzyme, mitochondrial OS=Homo sapiens GN=ME2 PE=1 SV=1 - [MAOM_HUMAN]	5	4	7		√
H7C2R1	NADH dehydrogenase [ubiquinone] 1 alpha subcomplex subunit 3 (Fragment) OS=Homo sapiens GN=NDUFA3 PE=1 SV=1 - [H7C2R1_HUMAN]	2	1	1		√
Q05CW7	NAT10 protein (Fragment) OS=Homo sapiens GN=NAT10 PE=2 SV=1 - [Q05CW7_HUMAN]	9	9	9	√
B0YJ47	Nebulette variant 4 OS=Homo sapiens GN=NEBL PE=4 SV=1 - [B0YJ47_HUMAN]	9	9	9		√
Q86UW6	NEDD4-binding protein 2 OS=Homo sapiens GN=N4BP2 PE=1 SV=2 - [N4BP2_HUMAN]	6	7	10		√
Q13564	NEDD8-activating enzyme E1 regulatory subunit OS=Homo sapiens GN=NAE1 PE=1 SV=1 - [ULA1_HUMAN]	3	3	4		√	√
Q8IXH7	Negative elongation factor C/D OS=Homo sapiens GN=NELFCD PE=1 SV=2 - [NELFD_HUMAN]	1	2	2	√
K9UUD5	NELL-1 protein short isoform OS=Homo sapiens GN=NELL1 PE=2 SV=1 - [K9UUD5_HUMAN]	1	2	2	√
O60500	Nephrin OS=Homo sapiens GN=NPHS1 PE=1 SV=1 - [NPHN_HUMAN]	3	2	5	√
D3DVC4	Nestin, isoform CRA_c OS=Homo sapiens GN=NES PE=3 SV=1 - [D3DVC4_HUMAN]	6	6	4		√
Q9NPE2	Neugrin OS=Homo sapiens GN=NGRN PE=1 SV=2 - [NGRN_HUMAN]	2	2	3	√
I3L100	Neuralized-like protein 4 (Fragment) OS=Homo sapiens GN=NEURL4 PE=1 SV=8 - [I3L100_HUMAN]	4	6	3	√
G5E9G7	Neurexin 2, isoform CRA_a OS=Homo sapiens GN=NRXN2 PE=1 SV=1 - [G5E9G7_HUMAN]	5	5	6		√	√
Q5T321	Neurobeachin OS=Homo sapiens GN=NBEA PE=1 SV=1 - [Q5T321_HUMAN]	5	8	9		√
O14594	Neurocan core protein OS=Homo sapiens GN=NCAN PE=1 SV=3 - [NCAN_HUMAN]	3	3	7		√
Q04721	Neurogenic locus notch homolog protein 2 OS=Homo sapiens GN=NOTCH2 PE=1 SV=3 - [NOTC2_HUMAN]	8	8	10	√	√	√
P30926	Neuronal acetylcholine receptor subunit beta-4 OS=Homo sapiens GN=CHRNB4 PE=1 SV=2 - [ACHB4_HUMAN]	2	2	4		√	√
H3BLV5	Neuronal migration protein doublecortin OS=Homo sapiens GN=DCX PE=1 SV=2 - [H3BLV5_HUMAN]	7	3	4	√	√
Q9NYX4	Neuron-specific vesicular protein calcyon OS=Homo sapiens GN=CALY PE=1 SV=1 - [CALY_HUMAN]	2	4	1		√	√
Q8IY17	Neuropathy target esterase OS=Homo sapiens GN=PNPLA6 PE=1 SV=2 - [PLPL6_HUMAN]	5	4	4		√
H7C046	Neutral cholesterol ester hydrolase 1 (Fragment) OS=Homo sapiens GN=NCEH1 PE=1 SV=1 - [H7C046_HUMAN]	1	1	1		√	√
H3BN40	Nuclear envelope phosphatase-regulatory subunit 1 OS=Homo sapiens GN=CNEP1R1 PE=1 SV=1 - [H3BN40_HUMAN]	1	1	1	√
B1AKN8	Nuclear factor 1 OS=Homo sapiens GN=NFIA PE=1 SV=1 - [B1AKN8_HUMAN]	3	3	3	√
P19838	Nuclear factor NF-kappa-B p105 subunit OS=Homo sapiens GN=NFKB1 PE=1 SV=2 - [NFKB1_HUMAN]	4	3	2	√
Q7Z417	Nuclear fragile X mental retardation-interacting protein 2 OS=Homo sapiens GN=NUFIP2 PE=1 SV=1 - [NUFP2_HUMAN]	1	6	6	√
Q68CJ6	Nuclear GTPase SLIP-GC OS=Homo sapiens GN=NUGGC PE=2 SV=3 - [SLIP_HUMAN]	6	2	7	√
P19338	Nucleolin OS=Homo sapiens GN=NCL PE=1 SV=3 - [NUCL_HUMAN]	19	15	17	√
P06748	Nucleophosmin OS=Homo sapiens GN=NPM1 PE=1 SV=2 - [NPM_HUMAN]	11	8	9	√
Q9BTX1	Nucleoporin NDC1 OS=Homo sapiens GN=NDC1 PE=1 SV=2 - [NDC1_HUMAN]	4	3	2	√
F8WC66	Nucleoporin-like protein 2 OS=Homo sapiens GN=NUPL2 PE=1 SV=1 - [F8WC66_HUMAN]	1	2	3	√
Q6DKJ4	Nucleoredoxin OS=Homo sapiens GN=NXN PE=1 SV=2 - [NXN_HUMAN]	2	2	3	√
F8W020	Nucleosome assembly protein 1-like 1 (Fragment) OS=Homo sapiens GN=NAP1L1 PE=1 SV=1 - [F8W020_HUMAN]	7	5	5	√
C9JZI7	Nucleosome assembly protein 1-like 4 (Fragment) OS=Homo sapiens GN=NAP1L4 PE=1 SV=1 - [C9JZI7_HUMAN]	4	4	4	√
Q96RS6	NudC domain-containing protein 1 OS=Homo sapiens GN=NUDCD1 PE=1 SV=2 - [NUDC1_HUMAN]	6	5	2	√
A6NGQ3	Obscurin OS=Homo sapiens GN=OBSCN PE=1 SV=5 - [A6NGQ3_HUMAN]	27	29	22		√
Q68BL8	Olfactomedin-like protein 2B OS=Homo sapiens GN=OLFML2B PE=2 SV=2 - [OLM2B_HUMAN]	2	3	2		√
Q8NGM8	Olfactory receptor 6M1 OS=Homo sapiens GN=OR6M1 PE=2 SV=1 - [OR6M1_HUMAN]	1	1	1			√
Q8WWZ8	Oncoprotein-induced transcript 3 protein OS=Homo sapiens GN=OIT3 PE=1 SV=2 - [OIT3_HUMAN]	1	1	3	√
Q9HC10	Otoferlin OS=Homo sapiens GN=OTOF PE=1 SV=3 - [OTOF_HUMAN]	5	4	8		√
Q7RTS6	Otopetrin-2 OS=Homo sapiens GN=OTOP2 PE=2 SV=3 - [OTOP2_HUMAN]	1	1	2			√
Q5VV17	OTU domain-containing protein 1 OS=Homo sapiens GN=OTUD1 PE=1 SV=1 - [OTUD1_HUMAN]	3	2	3		√
Q01804	OTU domain-containing protein 4 OS=Homo sapiens GN=OTUD4 PE=1 SV=4 - [OTUD4_HUMAN]	5	4	5		√
Q8TE49	OTU domain-containing protein 7A OS=Homo sapiens GN=OTUD7A PE=1 SV=1 - [OTU7A_HUMAN]	5	9	13		√
Q6GQQ9	OTU domain-containing protein 7B OS=Homo sapiens GN=OTUD7B PE=1 SV=1 - [OTU7B_HUMAN]	4	8	5		√
Q7RTY7	Ovochymase-1 OS=Homo sapiens GN=OVCH1 PE=2 SV=2 - [OVCH1_HUMAN]	4	5	6		√	√
P36551	Oxygen-dependent coproporphyrinogen-III oxidase, mitochondrial OS=Homo sapiens GN=CPOX PE=1 SV=3 - [HEM6_HUMAN]	4	3	6		√
P56715	Oxygen-regulated protein 1 OS=Homo sapiens GN=RP1 PE=1 SV=1 - [RP1_HUMAN]	11	11	5		√
B4DEG2	P2X purinoceptor OS=Homo sapiens GN=P2RX5 PE=1 SV=1 - [B4DEG2_HUMAN]	5	3	5	√	√	√
O75182	Paired amphipathic helix protein Sin3b OS=Homo sapiens GN=SIN3B PE=1 SV=2 - [SIN3B_HUMAN]	4	3	7	√
Q9NUE0	Palmitoyltransferase ZDHHC18 OS=Homo sapiens GN=ZDHHC18 PE=1 SV=2 - [ZDH18_HUMAN]	3	2	3		√	√
A2RUU9	PCM1 protein OS=Homo sapiens GN=PCM1 PE=2 SV=1 - [A2RUU9_HUMAN]	8	7	8	√	√
B2RWP2	PDZ domain containing ring finger 3 OS=Homo sapiens GN=PDZRN3 PE=2 SV=1 - [B2RWP2_HUMAN]	5	4	7		√
Q8NEN9	PDZ domain-containing protein 8 OS=Homo sapiens GN=PDZD8 PE=1 SV=1 - [PDZD8_HUMAN]	8	13	9		√
Q8TF64	PDZ domain-containing protein GIPC3 OS=Homo sapiens GN=GIPC3 PE=1 SV=1 - [GIPC3_HUMAN]	2	3	1		√
O15055	Period circadian protein homolog 2 OS=Homo sapiens GN=PER2 PE=1 SV=2 - [PER2_HUMAN]	6	2	7	√	√
K7EKI8	Periplakin OS=Homo sapiens GN=PPL PE=1 SV=1 - [K7EKI8_HUMAN]	11	7	11		√
Q92626	Peroxidasin homolog OS=Homo sapiens GN=PXDN PE=1 SV=2 - [PXDN_HUMAN]	5	3	5		√
Q13162	Peroxiredoxin-4 OS=Homo sapiens GN=PRDX4 PE=1 SV=1 - [PRDX4_HUMAN]	3	5	6		√
Q08426	Peroxisomal bifunctional enzyme OS=Homo sapiens GN=EHHADH PE=1 SV=3 - [ECHP_HUMAN]	4	2	2		√
Q2T9J0	Peroxisomal leader peptide-processing protease OS=Homo sapiens GN=TYSND1 PE=1 SV=3 - [TYSD1_HUMAN]	2	2	2		√
B5MCF9	Pescadillo homolog OS=Homo sapiens GN=PES1 PE=1 SV=1 - [B5MCF9_HUMAN]	6	5	6	√
Q6ZVD8	PH domain leucine-rich repeat-containing protein phosphatase 2 OS=Homo sapiens GN=PHLPP2 PE=1 SV=3 - [PHLP2_HUMAN]	4	2	4		√
Q96BD5	PHD finger protein 21A OS=Homo sapiens GN=PHF21A PE=1 SV=1 - [PF21A_HUMAN]	2	5	4	√
Q8TCU6	Phosphatidylinositol 3,4,5-trisphosphate-dependent Rac exchanger 1 protein OS=Homo sapiens GN=PREX1 PE=1 SV=3 - [PREX1_HUMAN]	4	6	3		√
P42338	Phosphatidylinositol 4,5-bisphosphate 3-kinase catalytic subunit beta isoform OS=Homo sapiens GN=PIK3CB PE=1 SV=1 - [PK3CB_HUMAN]	6	4	4		√
Q9UBF8	Phosphatidylinositol 4-kinase beta OS=Homo sapiens GN=PI4KB PE=1 SV=1 - [PI4KB_HUMAN]	4	2	5		√
O00443	Phosphatidylinositol 4-phosphate 3-kinase C2 domain-containing subunit alpha OS=Homo sapiens GN=PIK3C2A PE=1 SV=2 - [P3C2A_HUMAN]	4	9	7		√
Q8TAE4	Phosphodiesterase OS=Homo sapiens GN=PDE1C PE=2 SV=1 - [Q8TAE4_HUMAN]	4	6	6	√	√
F8VW41	Phosphofurin acidic cluster sorting protein 2 OS=Homo sapiens GN=PACS2 PE=1 SV=1 - [F8VW41_HUMAN]	3	2	4		√
P00558	Phosphoglycerate kinase 1 OS=Homo sapiens GN=PGK1 PE=1 SV=3 - [PGK1_HUMAN]	11	14	14		√
P18669	Phosphoglycerate mutase 1 OS=Homo sapiens GN=PGAM1 PE=1 SV=2 - [PGAM1_HUMAN]	7	7	10		√
O43520	Phospholipid-transporting ATPase IC OS=Homo sapiens GN=ATP8B1 PE=1 SV=3 - [AT8B1_HUMAN]	7	7	3		√	√
O60423	Phospholipid-transporting ATPase IK OS=Homo sapiens GN=ATP8B3 PE=2 SV=4 - [AT8B3_HUMAN]	7	2	3		√	√
Q14558	Phosphoribosyl pyrophosphate synthase-associated protein 1 OS=Homo sapiens GN=PRPSAP1 PE=1 SV=2 - [KPRA_HUMAN]	3	5	8		√
Q6NUL6	PITPNA protein (Fragment) OS=Homo sapiens GN=PITPNA PE=2 SV=1 - [Q6NUL6_HUMAN]	2	4	5		√
Q8TC59	Piwi-like protein 2 OS=Homo sapiens GN=PIWIL2 PE=1 SV=1 - [PIWL2_HUMAN]	4	4	4		√
Q7Z3Z4	Piwi-like protein 4 OS=Homo sapiens GN=PIWIL4 PE=2 SV=2 - [PIWL4_HUMAN]	5	4	4		√
Q9NS13	Placenta apolipoprotein B48 receptor type 2 OS=Homo sapiens GN=APOB48R PE=2 SV=1 - [Q9NS13_HUMAN]	6	6	5	√		√
Q9BX97	Plasmalemma vesicle-associated protein OS=Homo sapiens GN=PLVAP PE=2 SV=1 - [PLVAP_HUMAN]	3	6	5		√	√
P16234	Platelet-derived growth factor receptor alpha OS=Homo sapiens GN=PDGFRA PE=1 SV=1 - [PGFRA_HUMAN]	4	5	6	√		√
H0YDE2	Pleckstrin homology domain-containing family A member 7 (Fragment) OS=Homo sapiens GN=PLEKHA7 PE=1 SV=1 - [H0YDE2_HUMAN]	6	8	4		√
E9PFQ4	Pleckstrin homology-like domain family B member 2 (Fragment) OS=Homo sapiens GN=PHLDB2 PE=1 SV=1 - [E9PFQ4_HUMAN]	6	11	9		√
Q9UIW2	Plexin-A1 OS=Homo sapiens GN=PLXNA1 PE=1 SV=3 - [PLXA1_HUMAN]	7	4	10		√
Q460N5	Poly [ADP-ribose] polymerase 14 OS=Homo sapiens GN=PARP14 PE=1 SV=3 - [PAR14_HUMAN]	7	8	6	√	√
Q9NVV4	Poly(A) RNA polymerase, mitochondrial OS=Homo sapiens GN=MTPAP PE=1 SV=1 - [PAPD1_HUMAN]	6	3	4		√
O95453	Poly(A)-specific ribonuclease PARN OS=Homo sapiens GN=PARN PE=1 SV=1 - [PARN_HUMAN]	4	2	3	√	√
O75530	Polycomb protein EED OS=Homo sapiens GN=EED PE=1 SV=2 - [EED_HUMAN]	7	5	6	√
Q5SY16	Polynucleotide 5'-hydroxyl-kinase NOL9 OS=Homo sapiens GN=NOL9 PE=1 SV=1 - [NOL9_HUMAN]	3	5	2	√
Q8TCS8	Polyribonucleotide nucleotidyltransferase 1, mitochondrial OS=Homo sapiens GN=PNPT1 PE=1 SV=2 - [PNPT1_HUMAN]	3	6	4		√
Q6ICG8	Postacrosomal sheath WW domain-binding protein OS=Homo sapiens GN=WBP2NL PE=2 SV=1 - [WBP2L_HUMAN]	4	3	2		√
A8MYU2	Potassium channel subfamily U member 1 OS=Homo sapiens GN=KCNU1 PE=1 SV=2 - [KCNU1_HUMAN]	3	2	3			√
Q9H3M0	Potassium voltage-gated channel subfamily F member 1 OS=Homo sapiens GN=KCNF1 PE=1 SV=1 - [KCNF1_HUMAN]	2	3	4		√	√
Q8TAE7	Potassium voltage-gated channel subfamily G member 3 OS=Homo sapiens GN=KCNG3 PE=1 SV=1 - [KCNG3_HUMAN]	3	2	2		√	√
Q96KK3	Potassium voltage-gated channel subfamily S member 1 OS=Homo sapiens GN=KCNS1 PE=1 SV=2 - [KCNS1_HUMAN]	4	1	1		√	√
B2RU13	Potassium voltage-gated channel, shaker-related subfamily, member 7 OS=Homo sapiens GN=KCNA7 PE=2 SV=1 - [B2RU13_HUMAN]	6	1	3	√		√
Q9Y3Q4	Potassium/sodium hyperpolarization-activated cyclic nucleotide-gated channel 4 OS=Homo sapiens GN=HCN4 PE=1 SV=1 - [HCN4_HUMAN]	4	4	6		√	√
P0CG38	POTE ankyrin domain family member I OS=Homo sapiens GN=POTEI PE=3 SV=1 - [POTEI_HUMAN]	9	10	10	√		√
Q9C0J8	pre-mRNA 3' end processing protein WDR33 OS=Homo sapiens GN=WDR33 PE=1 SV=2 - [WDR33_HUMAN]	5	5	6	√
Q9HCG8	Pre-mRNA-splicing factor CWC22 homolog OS=Homo sapiens GN=CWC22 PE=1 SV=3 - [CWC22_HUMAN]	8	4	6	√
Q9NW64	Pre-mRNA-splicing factor RBM22 OS=Homo sapiens GN=RBM22 PE=1 SV=1 - [RBM22_HUMAN]	2	2	3	√
E9PCM2	Prestin OS=Homo sapiens GN=SLC26A5 PE=3 SV=1 - [E9PCM2_HUMAN]	4	7	2	√	√	√
H3BLZ8	Probable ATP-dependent RNA helicase DDX17 OS=Homo sapiens GN=DDX17 PE=1 SV=1 - [H3BLZ8_HUMAN]	19	20	20	√
J3KPF0	Probable E3 ubiquitin-protein ligase HECTD4 OS=Homo sapiens GN=HECTD4 PE=1 SV=3 - [J3KPF0_HUMAN]	15	18	18		√	√
H0Y9U0	Probable E3 ubiquitin-protein ligase HERC6 (Fragment) OS=Homo sapiens GN=HERC6 PE=1 SV=1 - [H0Y9U0_HUMAN]	2	2	2		√
Q7Z333	Probable helicase senataxin OS=Homo sapiens GN=SETX PE=1 SV=4 - [SETX_HUMAN]	11	10	14	√
P98196	Probable phospholipid-transporting ATPase IH OS=Homo sapiens GN=ATP11A PE=1 SV=3 - [AT11A_HUMAN]	3	5	6		√	√
O43861	Probable phospholipid-transporting ATPase IIB OS=Homo sapiens GN=ATP9B PE=2 SV=4 - [ATP9B_HUMAN]	3	5	5		√	√
Q8WWH5	Probable tRNA pseudouridine synthase 1 OS=Homo sapiens GN=TRUB1 PE=1 SV=1 - [TRUB1_HUMAN]	4	1	4	√
Q8NBJ5	Procollagen galactosyltransferase 1 OS=Homo sapiens GN=COLGALT1 PE=1 SV=1 - [GT251_HUMAN]	6	6	6		√	√
Q14005	Pro-interleukin-16 OS=Homo sapiens GN=IL16 PE=1 SV=4 - [IL16_HUMAN]	7	6	6		√
Q9H6K5	Proline-rich protein 36 OS=Homo sapiens GN=PRR36 PE=1 SV=2 - [PRR36_HUMAN]	5	6	7		√
Q8IVL5	Prolyl 3-hydroxylase 2 OS=Homo sapiens GN=P3H2 PE=1 SV=1 - [P3H2_HUMAN]	4	2	4		√
Q7Z4N8	Prolyl 4-hydroxylase subunit alpha-3 OS=Homo sapiens GN=P4HA3 PE=1 SV=1 - [P4HA3_HUMAN]	1	4	1		√
F5GZS7	Pro-neuregulin-2, membrane-bound isoform OS=Homo sapiens GN=NRG2 PE=4 SV=1 - [F5GZS7_HUMAN]	1	2	2		√
P28066	Proteasome subunit alpha type-5 OS=Homo sapiens GN=PSMA5 PE=1 SV=3 - [PSA5_HUMAN]	1	1	2	√	√
O14818	Proteasome subunit alpha type-7 OS=Homo sapiens GN=PSMA7 PE=1 SV=1 - [PSA7_HUMAN]	5	4	7	√	√
Q8TD16	Protein bicaudal D homolog 2 OS=Homo sapiens GN=BICD2 PE=1 SV=1 - [BICD2_HUMAN]	7	5	8		√
U3KQ07	Protein C10 OS=Homo sapiens GN=C12orf57 PE=1 SV=1 - [U3KQ07_HUMAN]	2	2	2		√
Q2KHT3	Protein CLEC16A OS=Homo sapiens GN=CLEC16A PE=1 SV=2 - [CL16A_HUMAN]	2	2	5	√	√
F5H0L2	Protein crumbs homolog 1 OS=Homo sapiens GN=CRB1 PE=1 SV=1 - [F5H0L2_HUMAN]	4	2	5		√	√
P35659	Protein DEK OS=Homo sapiens GN=DEK PE=1 SV=1 - [DEK_HUMAN]	3	4	3	√	√
H7C1C1	Protein downstream neighbor of Son (Fragment) OS=Homo sapiens GN=DONSON PE=1 SV=1 - [H7C1C1_HUMAN]	4	2	5	√
P0C7U0	Protein ELFN1 OS=Homo sapiens GN=ELFN1 PE=1 SV=2 - [ELFN1_HUMAN]	3	6	4			√
Q8WYP5	Protein ELYS OS=Homo sapiens GN=AHCTF1 PE=1 SV=3 - [ELYS_HUMAN]	9	6	8	√	√
Q03111	Protein ENL OS=Homo sapiens GN=MLLT1 PE=1 SV=2 - [ENL_HUMAN]	6	4	4	√
Q6P1L5	Protein FAM117B OS=Homo sapiens GN=FAM117B PE=1 SV=2 - [F117B_HUMAN]	5	4	5	√
O94988	Protein FAM13A OS=Homo sapiens GN=FAM13A PE=1 SV=2 - [FA13A_HUMAN]	4	3	8	√
Q6P995	Protein FAM171B OS=Homo sapiens GN=FAM171B PE=2 SV=3 - [F171B_HUMAN]	3	2	4	√
Q32MH5	Protein FAM214A OS=Homo sapiens GN=FAM214A PE=1 SV=2 - [F214A_HUMAN]	8	4	6	√
I3L427	Protein FAM64A OS=Homo sapiens GN=FAM64A PE=1 SV=1 - [I3L427_HUMAN]	2	1	2	√
Q5T0W9	Protein FAM83B OS=Homo sapiens GN=FAM83B PE=1 SV=1 - [FA83B_HUMAN]	3	6	6	√
Q9BQN1	Protein FAM83C OS=Homo sapiens GN=FAM83C PE=1 SV=3 - [FA83C_HUMAN]	4	2	6	√
Q86YD7	Protein FAM90A1 OS=Homo sapiens GN=FAM90A1 PE=1 SV=3 - [F90A1_HUMAN]	5	6	4	√
A6NNH2	Protein FAM90A27P OS=Homo sapiens GN=FAM90A27P PE=3 SV=2 - [F90AR_HUMAN]	4	2	1	√
Q9UK73	Protein fem-1 homolog B OS=Homo sapiens GN=FEM1B PE=1 SV=1 - [FEM1B_HUMAN]	2	3	2	√	√
Q9ULD6	Protein inturned OS=Homo sapiens GN=INTU PE=1 SV=2 - [INTU_HUMAN]	7	6	5		√
Q9Y219	Protein jagged-2 OS=Homo sapiens GN=JAG2 PE=1 SV=3 - [JAG2_HUMAN]	4	2	3		√	√
Q9H799	Protein JBTS17 OS=Homo sapiens GN=C5orf42 PE=1 SV=4 - [CE042_HUMAN]	7	11	8	√
O60303	Protein KIAA0556 OS=Homo sapiens GN=KIAA0556 PE=1 SV=4 - [K0556_HUMAN]	5	6	6		√
Q96GA3	Protein LTV1 homolog OS=Homo sapiens GN=LTV1 PE=1 SV=1 - [LTV1_HUMAN]	2	3	3	√
P61326	Protein mago nashi homolog OS=Homo sapiens GN=MAGOH PE=1 SV=1 - [MGN_HUMAN]	4	2	2	√
Q969F2	Protein naked cuticle homolog 2 OS=Homo sapiens GN=NKD2 PE=1 SV=1 - [NKD2_HUMAN]	6	4	5		√
F2Z3L7	Protein NipSnap homolog 3B OS=Homo sapiens GN=NIPSNAP3B PE=1 SV=1 - [F2Z3L7_HUMAN]	1	1	1		√
Q9P2P1	Protein NYNRIN OS=Homo sapiens GN=NYNRIN PE=2 SV=3 - [NYNRI_HUMAN]	3	2	5	√	√
Q9BZL4	Protein phosphatase 1 regulatory subunit 12C OS=Homo sapiens GN=PPP1R12C PE=1 SV=1 - [PP12C_HUMAN]	9	6	6		√
Q6ZMI0	Protein phosphatase 1 regulatory subunit 21 OS=Homo sapiens GN=PPP1R21 PE=1 SV=1 - [PPR21_HUMAN]	2	3	4		√
C9J177	Protein phosphatase 1 regulatory subunit 7 (Fragment) OS=Homo sapiens GN=PPP1R7 PE=1 SV=1 - [C9J177_HUMAN]	3	4	2		√
Q9ULR3	Protein phosphatase 1H OS=Homo sapiens GN=PPM1H PE=1 SV=2 - [PPM1H_HUMAN]	3	2	3		√
Q86U86	Protein polybromo-1 OS=Homo sapiens GN=PBRM1 PE=1 SV=1 - [PB1_HUMAN]	9	8	13	√	√
Q5THK1	Protein PRR14L OS=Homo sapiens GN=PRR14L PE=1 SV=1 - [PR14L_HUMAN]	9	8	7		√
P48634	Protein PRRC2A OS=Homo sapiens GN=PRRC2A PE=1 SV=3 - [PRC2A_HUMAN]	14	13	22		√
O43819	Protein SCO2 homolog, mitochondrial OS=Homo sapiens GN=SCO2 PE=1 SV=3 - [SCO2_HUMAN]	4	2	4		√
Q6IQ49	Protein SDE2 homolog OS=Homo sapiens GN=SDE2 PE=1 SV=1 - [SDE2_HUMAN]	5	4	5	√	√
Q6UWI4	Protein shisa-2 homolog OS=Homo sapiens GN=SHISA2 PE=1 SV=1 - [SHSA2_HUMAN]	1	2	1	√		√
P0C7P3	Protein SLFN14 OS=Homo sapiens GN=SLFN14 PE=1 SV=2 - [SLN14_HUMAN]	4	1	5		√
Q9UPU9	Protein Smaug homolog 1 OS=Homo sapiens GN=SAMD4A PE=1 SV=3 - [SMAG1_HUMAN]	2	1	3		√
Q9UPR3	Protein SMG5 OS=Homo sapiens GN=SMG5 PE=1 SV=3 - [SMG5_HUMAN]	4	3	4	√	√
Q96EA4	Protein Spindly OS=Homo sapiens GN=SPDL1 PE=1 SV=2 - [SPDLY_HUMAN]	4	6	5		√
Q9HCD6	Protein TANC2 OS=Homo sapiens GN=TANC2 PE=1 SV=3 - [TANC2_HUMAN]	11	9	10		√
Q9UPX0	Protein turtle homolog B OS=Homo sapiens GN=IGSF9B PE=2 SV=2 - [TUTLB_HUMAN]	6	1	4	√		√
Q9C0H2	Protein tweety homolog 3 OS=Homo sapiens GN=TTYH3 PE=1 SV=3 - [TTYH3_HUMAN]	1	2	1			√
Q8N2C7	Protein unc-80 homolog OS=Homo sapiens GN=UNC80 PE=1 SV=2 - [UNC80_HUMAN]	14	5	12	√	√	√
Q76NI1	Protein very KIND OS=Homo sapiens GN=KNDC1 PE=2 SV=2 - [VKIND_HUMAN]	4	6	7	√
Q69YN4	Protein virilizer homolog OS=Homo sapiens GN=KIAA1429 PE=1 SV=2 - [VIR_HUMAN]	7	9	8	√
Q9Y4B6	Protein VPRBP OS=Homo sapiens GN=VPRBP PE=1 SV=3 - [VPRBP_HUMAN]	2	6	7	√	√
D6RGY8	Protein YIPF3 (Fragment) OS=Homo sapiens GN=YIPF3 PE=1 SV=1 - [D6RGY8_HUMAN]	1	1	4		√	√
Q86YA3	Protein ZGRF1 OS=Homo sapiens GN=ZGRF1 PE=1 SV=3 - [ZGRF1_HUMAN]	6	7	8		√
Q96PF1	Protein-glutamine gamma-glutamyltransferase Z OS=Homo sapiens GN=TGM7 PE=2 SV=1 - [TGM7_HUMAN]	3	3	3		√
Q96AD6	Protein-serine/threonine kinase OS=Homo sapiens GN=GRK6 PE=2 SV=1 - [Q96AD6_HUMAN]	6	3	5		√	√
Q6P4R2	Protocadherin alpha subfamily C, 2 OS=Homo sapiens GN=PCDHAC2 PE=2 SV=1 - [Q6P4R2_HUMAN]	4	2	6		√
Q9Y5I3	Protocadherin alpha-1 OS=Homo sapiens GN=PCDHA1 PE=2 SV=1 - [PCDA1_HUMAN]	4	1	4		√	√
Q9NYQ8	Protocadherin Fat 2 OS=Homo sapiens GN=FAT2 PE=1 SV=2 - [FAT2_HUMAN]	4	9	10		√
Q9Y5F9	Protocadherin gamma-B6 OS=Homo sapiens GN=PCDHGB6 PE=2 SV=1 - [PCDGI_HUMAN]	5	3	7			√
Q8TAB3	Protocadherin-19 OS=Homo sapiens GN=PCDH19 PE=1 SV=3 - [PCD19_HUMAN]	4	7	7		√	√
O60245	Protocadherin-7 OS=Homo sapiens GN=PCDH7 PE=1 SV=2 - [PCDH7_HUMAN]	4	3	3		√	√
Q2VWP7	Protogenin OS=Homo sapiens GN=PRTG PE=2 SV=1 - [PRTG_HUMAN]	2	1	3	√	√
Q15397	Pumilio homolog 3 OS=Homo sapiens GN=PUM3 PE=1 SV=3 - [PUM3_HUMAN]	9	5	7		√
P00491	Purine nucleoside phosphorylase OS=Homo sapiens GN=PNP PE=1 SV=2 - [PNPH_HUMAN]	2	2	2	√	√	√
P48539	Purkinje cell protein 4 OS=Homo sapiens GN=PCP4 PE=1 SV=3 - [PCP4_HUMAN]	1	2	2		√
Q92771	Putative ATP-dependent RNA helicase DDX12 OS=Homo sapiens GN=DDX12P PE=5 SV=3 - [DDX12_HUMAN]	10	6	9	√
Q6P158	Putative ATP-dependent RNA helicase DHX57 OS=Homo sapiens GN=DHX57 PE=1 SV=2 - [DHX57_HUMAN]	5	6	6	√
Q8IVE0	Putative ciliary rootlet coiled-coil protein-like 2 protein OS=Homo sapiens GN=CROCCP3 PE=5 SV=1 - [CROL2_HUMAN]	4	2	2		√
Q8TAB7	Putative coiled-coil domain-containing protein 26 OS=Homo sapiens GN=CCDC26 PE=5 SV=1 - [CCD26_HUMAN]	2	2	2		√
Q8TEC5	Putative E3 ubiquitin-protein ligase SH3RF2 OS=Homo sapiens GN=SH3RF2 PE=1 SV=3 - [SH3R2_HUMAN]	3	2	3		√
Q58FF3	Putative endoplasmin-like protein OS=Homo sapiens GN=HSP90B2P PE=5 SV=1 - [ENPLL_HUMAN]	6	8	6		√
Q8NGA4	Putative G-protein coupled receptor GPR32P1 OS=Homo sapiens GN=GPR32P1 PE=5 SV=2 - [G32P1_HUMAN]	1	1	1			√
Q58FF7	Putative heat shock protein HSP 90-beta-3 OS=Homo sapiens GN=HSP90AB3P PE=5 SV=1 - [H90B3_HUMAN]	18	20	19		√
P0C860	Putative male-specific lethal-3 protein-like 2 OS=Homo sapiens GN=MSL3P1 PE=5 SV=1 - [MS3L2_HUMAN]	3	2	3	√
Q8NHP8	Putative phospholipase B-like 2 OS=Homo sapiens GN=PLBD2 PE=1 SV=2 - [PLBL2_HUMAN]	3	4	3		√
Q76L83	Putative Polycomb group protein ASXL2 OS=Homo sapiens GN=ASXL2 PE=1 SV=1 - [ASXL2_HUMAN]	9	4	5	√
Q9C0F0	Putative Polycomb group protein ASXL3 OS=Homo sapiens GN=ASXL3 PE=2 SV=3 - [ASXL3_HUMAN]	8	4	5	√
Q13670	Putative postmeiotic segregation increased 2-like protein 11 OS=Homo sapiens GN=PMS2P11 PE=5 SV=1 - [PM2PB_HUMAN]	3	2	4	√
Q6P2P2	Putative protein arginine N-methyltransferase 9 OS=Homo sapiens GN=PRMT9 PE=2 SV=1 - [ANM9_HUMAN]	4	6	4	√	√
Q5HY64	Putative protein FAM47C OS=Homo sapiens GN=FAM47C PE=2 SV=1 - [FA47C_HUMAN]	4	4	5		√
Q8NDT2	Putative RNA-binding protein 15B OS=Homo sapiens GN=RBM15B PE=1 SV=3 - [RB15B_HUMAN]	8	8	5	√
Q9GZW5	Putative SCAN domain-containing protein SCAND2P OS=Homo sapiens GN=SCAND2P PE=5 SV=2 - [SCND2_HUMAN]	2	4	4	√
Q5T440	Putative transferase CAF17, mitochondrial OS=Homo sapiens GN=IBA57 PE=1 SV=1 - [CAF17_HUMAN]	3	1	1		√
Q96N64	PWWP domain-containing protein 2A OS=Homo sapiens GN=PWWP2A PE=1 SV=2 - [PWP2A_HUMAN]	8	3	8	√
Q8NFW9	Rab effector MyRIP OS=Homo sapiens GN=MYRIP PE=1 SV=2 - [MYRIP_HUMAN]	3	3	4		√
Q7L804	Rab11 family-interacting protein 2 OS=Homo sapiens GN=RAB11FIP2 PE=1 SV=1 - [RFIP2_HUMAN]	3	1	3	√		√
Q86YS3	Rab11 family-interacting protein 4 OS=Homo sapiens GN=RAB11FIP4 PE=1 SV=1 - [RFIP4_HUMAN]	4	8	6		√	√
Q6IAA8	Ragulator complex protein LAMTOR1 OS=Homo sapiens GN=LAMTOR1 PE=1 SV=2 - [LTOR1_HUMAN]	4	3	3		√	√
O60518	Ran-binding protein 6 OS=Homo sapiens GN=RANBP6 PE=1 SV=2 - [RNBP6_HUMAN]	7	8	7	√	√
Q9UJF2	Ras GTPase-activating protein nGAP OS=Homo sapiens GN=RASAL2 PE=1 SV=2 - [NGAP_HUMAN]	4	10	7		√	√
Q15907	Ras-related protein Rab-11B OS=Homo sapiens GN=RAB11B PE=1 SV=4 - [RB11B_HUMAN]	5	5	7		√
P61106	Ras-related protein Rab-14 OS=Homo sapiens GN=RAB14 PE=1 SV=4 - [RAB14_HUMAN]	11	10	10		√
Q9H0U4	Ras-related protein Rab-1B OS=Homo sapiens GN=RAB1B PE=1 SV=1 - [RAB1B_HUMAN]	9	10	9		√
Q9UL26	Ras-related protein Rab-22A OS=Homo sapiens GN=RAB22A PE=1 SV=2 - [RB22A_HUMAN]	1	2	1		√
P61019	Ras-related protein Rab-2A OS=Homo sapiens GN=RAB2A PE=1 SV=1 - [RAB2A_HUMAN]	11	10	11		√
Q13636	Ras-related protein Rab-31 OS=Homo sapiens GN=RAB31 PE=1 SV=1 - [RAB31_HUMAN]	2	3	4		√
C9JBG0	Ras-related protein Rab-34, isoform NARR (Fragment) OS=Homo sapiens GN=RAB34 PE=1 SV=8 - [C9JBG0_HUMAN]	2	2	4		√
Q15286	Ras-related protein Rab-35 OS=Homo sapiens GN=RAB35 PE=1 SV=1 - [RAB35_HUMAN]	5	5	6		√
P62070	Ras-related protein R-Ras2 OS=Homo sapiens GN=RRAS2 PE=1 SV=1 - [RRAS2_HUMAN]	7	5	6		√	√
Q92766	Ras-responsive element-binding protein 1 OS=Homo sapiens GN=RREB1 PE=1 SV=3 - [RREB1_HUMAN]	6	4	5	√
B7ZMB3	RC3H1 protein OS=Homo sapiens GN=RC3H1 PE=2 SV=1 - [B7ZMB3_HUMAN]	3	2	7		√
Q92729	Receptor-type tyrosine-protein phosphatase U OS=Homo sapiens GN=PTPRU PE=1 SV=2 - [PTPRU_HUMAN]	5	5	3		√	√
P23471	Receptor-type tyrosine-protein phosphatase zeta OS=Homo sapiens GN=PTPRZ1 PE=1 SV=4 - [PTPRZ_HUMAN]	6	7	3		√	√
Q86UR5	Regulating synaptic membrane exocytosis protein 1 OS=Homo sapiens GN=RIMS1 PE=1 SV=1 - [RIMS1_HUMAN]	13	14	13		√	√
D6RA03	Regulating synaptic membrane exocytosis protein 2 OS=Homo sapiens GN=RIMS2 PE=1 SV=1 - [D6RA03_HUMAN]	9	11	9	√		√
Q9HAU5	Regulator of nonsense transcripts 2 OS=Homo sapiens GN=UPF2 PE=1 SV=1 - [RENT2_HUMAN]	5	3	3		√
P28749	Retinoblastoma-like protein 1 OS=Homo sapiens GN=RBL1 PE=1 SV=3 - [RBL1_HUMAN]	5	8	5	√
Q7Z5J4	Retinoic acid-induced protein 1 OS=Homo sapiens GN=RAI1 PE=1 SV=2 - [RAI1_HUMAN]	7	11	12	√	√
Q8IZV5	Retinol dehydrogenase 10 OS=Homo sapiens GN=RDH10 PE=1 SV=1 - [RDH10_HUMAN]	3	1	3		√
Q9HBH5	Retinol dehydrogenase 14 OS=Homo sapiens GN=RDH14 PE=1 SV=1 - [RDH14_HUMAN]	5	4	3		√
Q8NET4	Retrotransposon gag domain-containing protein 1 OS=Homo sapiens GN=RGAG1 PE=1 SV=1 - [RGAG1_HUMAN]	8	6	8	√
J3KRE2	Rho GDP-dissociation inhibitor 1 OS=Homo sapiens GN=ARHGDIA PE=1 SV=1 - [J3KRE2_HUMAN]	5	4	4		√
A7KAX9	Rho GTPase-activating protein 32 OS=Homo sapiens GN=ARHGAP32 PE=1 SV=1 - [RHG32_HUMAN]	6	8	9		√
Q5VT97	Rho GTPase-activating protein SYDE2 OS=Homo sapiens GN=SYDE2 PE=1 SV=2 - [SYDE2_HUMAN]	2	4	6		√
O15013	Rho guanine nucleotide exchange factor 10 OS=Homo sapiens GN=ARHGEF10 PE=1 SV=4 - [ARHGA_HUMAN]	5	3	6		√
O15085	Rho guanine nucleotide exchange factor 11 OS=Homo sapiens GN=ARHGEF11 PE=1 SV=1 - [ARHGB_HUMAN]	8	8	3		√
A8MVX0	Rho guanine nucleotide exchange factor 33 OS=Homo sapiens GN=ARHGEF33 PE=2 SV=2 - [ARG33_HUMAN]	3	3	5		√
Q9NXL2	Rho guanine nucleotide exchange factor 38 OS=Homo sapiens GN=ARHGEF38 PE=2 SV=2 - [ARH38_HUMAN]	3	4	2		√
E7EV07	Rho guanine nucleotide exchange factor 4 OS=Homo sapiens GN=ARHGEF4 PE=1 SV=2 - [E7EV07_HUMAN]	6	5	6		√
O75116	Rho-associated protein kinase 2 OS=Homo sapiens GN=ROCK2 PE=1 SV=4 - [ROCK2_HUMAN]	13	11	20		√
O94955	Rho-related BTB domain-containing protein 3 OS=Homo sapiens GN=RHOBTB3 PE=1 SV=2 - [RHBT3_HUMAN]	2	3	4		√
E7EQV9	Ribosomal protein L15 (Fragment) OS=Homo sapiens GN=RPL15 PE=1 SV=1 - [E7EQV9_HUMAN]	7	7	6	√
Q9BQQ5	Ribosomal protein L27a OS=Homo sapiens GN=L27a PE=4 SV=1 - [Q9BQQ5_HUMAN]	5	5	4	√
Q9UK32	Ribosomal protein S6 kinase alpha-6 OS=Homo sapiens GN=RPS6KA6 PE=1 SV=1 - [KS6A6_HUMAN]	4	4	5	√
F2Z2J1	Ribosomal protein S6 kinase OS=Homo sapiens GN=RPS6KA2 PE=1 SV=1 - [F2Z2J1_HUMAN]	9	9	12	√
Q96EU6	Ribosomal RNA processing protein 36 homolog OS=Homo sapiens GN=RRP36 PE=1 SV=1 - [RRP36_HUMAN]	4	4	4	√
Q9BXT8	RING finger protein 17 OS=Homo sapiens GN=RNF17 PE=1 SV=3 - [RNF17_HUMAN]	5	4	10	√
P0DH78	RING finger protein 224 OS=Homo sapiens GN=RNF224 PE=4 SV=1 - [RN224_HUMAN]	1	1	1	√
Q9Y2P8	RNA 3'-terminal phosphate cyclase-like protein OS=Homo sapiens GN=RCL1 PE=1 SV=3 - [RCL1_HUMAN]	6	3	3	√
O00472	RNA polymerase II elongation factor ELL2 OS=Homo sapiens GN=ELL2 PE=1 SV=2 - [ELL2_HUMAN]	5	5	4	√
Q8N7X1	RNA-binding motif protein, X-linked-like-3 OS=Homo sapiens GN=RBMXL3 PE=2 SV=2 - [RMXL3_HUMAN]	4	4	7	√
Q96PK6	RNA-binding protein 14 OS=Homo sapiens GN=RBM14 PE=1 SV=2 - [RBM14_HUMAN]	4	3	11	√
P49756	RNA-binding protein 25 OS=Homo sapiens GN=RBM25 PE=1 SV=3 - [RBM25_HUMAN]	6	7	9	√
Q9NW13	RNA-binding protein 28 OS=Homo sapiens GN=RBM28 PE=1 SV=3 - [RBM28_HUMAN]	7	8	11	√
Q6ZP01	RNA-binding protein 44 OS=Homo sapiens GN=RBM44 PE=2 SV=2 - [RBM44_HUMAN]	3	5	9	√
Q9Y5S9	RNA-binding protein 8A OS=Homo sapiens GN=RBM8A PE=1 SV=1 - [RBM8A_HUMAN]	1	1	2	√
A1L020	RNA-binding protein MEX3A OS=Homo sapiens GN=MEX3A PE=1 SV=1 - [MEX3A_HUMAN]	2	1	2	√
H3BMS0	RNA-binding protein with serine-rich domain 1 OS=Homo sapiens GN=RNPS1 PE=1 SV=1 - [H3BMS0_HUMAN]	5	5	9	√
Q2HIY3	RNF130 protein OS=Homo sapiens GN=RNF130 PE=2 SV=1 - [Q2HIY3_HUMAN]	4	2	3	√	√	√
Q9HBD1	Roquin-2 OS=Homo sapiens GN=RC3H2 PE=1 SV=2 - [RC3H2_HUMAN]	3	5	7		√
Q86VV8	Rotatin OS=Homo sapiens GN=RTTN PE=1 SV=3 - [RTTN_HUMAN]	9	6	7		√
A6NHQ2	rRNA/tRNA 2'-O-methyltransferase fibrillarin-like protein 1 OS=Homo sapiens GN=FBLL1 PE=3 SV=2 - [FBLL1_HUMAN]	8	4	10	√
Q92736	Ryanodine receptor 2 OS=Homo sapiens GN=RYR2 PE=1 SV=3 - [RYR2_HUMAN]	15	12	14		√	√
Q14BN4	Sarcolemmal membrane-associated protein OS=Homo sapiens GN=SLMAP PE=1 SV=1 - [SLMAP_HUMAN]	9	3	4		√	√
Q6R2W3	SCAN domain-containing protein 3 OS=Homo sapiens GN=ZBED9 PE=2 SV=1 - [SCND3_HUMAN]	5	3	10	√
O95171	Sciellin OS=Homo sapiens GN=SCEL PE=1 SV=2 - [SCEL_HUMAN]	6	5	7		√
A2VEC9	SCO-spondin OS=Homo sapiens GN=SSPO PE=2 SV=1 - [SSPO_HUMAN]	4	3	4	√
O95025	Semaphorin-3D OS=Homo sapiens GN=SEMA3D PE=2 SV=2 - [SEM3D_HUMAN]	2	3	3		√	√
Q9NQ38	Serine protease inhibitor Kazal-type 5 OS=Homo sapiens GN=SPINK5 PE=1 SV=2 - [ISK5_HUMAN]	5	13	7		√
A6NNA2	Serine/arginine repetitive matrix protein 3 OS=Homo sapiens GN=SRRM3 PE=2 SV=4 - [SRRM3_HUMAN]	6	2	6		√
Q6DT37	Serine/threonine-protein kinase MRCK gamma OS=Homo sapiens GN=CDC42BPG PE=1 SV=2 - [MRCKG_HUMAN]	7	2	4		√
P42345	Serine/threonine-protein kinase mTOR OS=Homo sapiens GN=MTOR PE=1 SV=1 - [MTOR_HUMAN]	12	6	9		√
Q16513	Serine/threonine-protein kinase N2 OS=Homo sapiens GN=PKN2 PE=1 SV=1 - [PKN2_HUMAN]	9	3	5		√
Q96PY6	Serine/threonine-protein kinase Nek1 OS=Homo sapiens GN=NEK1 PE=1 SV=2 - [NEK1_HUMAN]	8	5	6		√
Q6ZWH5	Serine/threonine-protein kinase Nek10 OS=Homo sapiens GN=NEK10 PE=2 SV=3 - [NEK10_HUMAN]	3	3	5		√
H0Y494	Serine/threonine-protein kinase SIK3 OS=Homo sapiens GN=SIK3 PE=1 SV=1 - [H0Y494_HUMAN]	4	4	4		√
O75385	Serine/threonine-protein kinase ULK1 OS=Homo sapiens GN=ULK1 PE=1 SV=2 - [ULK1_HUMAN]	3	4	6		√
F8W9F9	Serine/threonine-protein kinase WNK2 OS=Homo sapiens GN=WNK2 PE=1 SV=1 - [F8W9F9_HUMAN]	7	12	8		√
Q9UPN1	Serine/threonine-protein phosphatase (Fragment) OS=Homo sapiens GN=PPP1CC PE=3 SV=1 - [Q9UPN1_HUMAN]	2	3	4		√
Q96QC0	Serine/threonine-protein phosphatase 1 regulatory subunit 10 OS=Homo sapiens GN=PPP1R10 PE=1 SV=1 - [PP1RA_HUMAN]	4	7	6		√
C9J9C1	Serine/threonine-protein phosphatase 2A 65 kDa regulatory subunit A alpha isoform (Fragment) OS=Homo sapiens GN=PPP2R1A PE=1 SV=2 - [C9J9C1_HUMAN]	7	9	9		√
O75170	Serine/threonine-protein phosphatase 6 regulatory subunit 2 OS=Homo sapiens GN=PPP6R2 PE=1 SV=2 - [PP6R2_HUMAN]	7	4	8		√
Q8NEF9	Serum response factor-binding protein 1 OS=Homo sapiens GN=SRFBP1 PE=1 SV=1 - [SRFB1_HUMAN]	3	6	3		√
Q9Y6X0	SET-binding protein OS=Homo sapiens GN=SETBP1 PE=1 SV=3 - [SETBP_HUMAN]	7	7	9	√
Q5VZ18	SH2 domain-containing adapter protein E OS=Homo sapiens GN=SHE PE=1 SV=1 - [SHE_HUMAN]	4	5	7	√
O75368	SH3 domain-binding glutamic acid-rich-like protein OS=Homo sapiens GN=SH3BGRL PE=1 SV=1 - [SH3L1_HUMAN]	4	3	3		√
Q8TEJ3	SH3 domain-containing RING finger protein 3 OS=Homo sapiens GN=SH3RF3 PE=1 SV=2 - [SH3R3_HUMAN]	2	3	4		√
P98077	SHC-transforming protein 2 OS=Homo sapiens GN=SHC2 PE=1 SV=4 - [SHC2_HUMAN]	6	2	4		√
A0MZ66	Shootin-1 OS=Homo sapiens GN=SHTN1 PE=1 SV=4 - [SHOT1_HUMAN]	5	3	3		√
O15266	Short stature homeobox protein OS=Homo sapiens GN=SHOX PE=1 SV=1 - [SHOX_HUMAN]	4	6	6	√
E9PL79	Sialic acid-binding Ig-like lectin 10 OS=Homo sapiens GN=SIGLEC10 PE=1 SV=1 - [E9PL79_HUMAN]	4	2	3		√	√
C9JEA3	Sialidase-4 (Fragment) OS=Homo sapiens GN=NEU4 PE=4 SV=1 - [C9JEA3_HUMAN]	2	1	1		√	√
A5D8Z7	SIGLEC1 protein (Fragment) OS=Homo sapiens GN=SIGLEC1 PE=2 SV=1 - [A5D8Z7_HUMAN]	4	3	2		√	√
P08240	Signal recognition particle receptor subunit alpha OS=Homo sapiens GN=SRPRA PE=1 SV=2 - [SRPRA_HUMAN]	14	11	16		√
P42224	Signal transducer and activator of transcription 1-alpha/beta OS=Homo sapiens GN=STAT1 PE=1 SV=2 - [STAT1_HUMAN]	15	15	20	√	√
B5BTZ6	Signal transducer and activator of transcription OS=Homo sapiens GN=STAT3 PE=2 SV=1 - [B5BTZ6_HUMAN]	12	13	15	√	√
Q2VWA4	SKI family transcriptional corepressor 2 OS=Homo sapiens GN=SKOR2 PE=1 SV=2 - [SKOR2_HUMAN]	5	6	5	√	√
Q9P270	SLAIN motif-containing protein 2 OS=Homo sapiens GN=SLAIN2 PE=1 SV=2 - [SLAI2_HUMAN]	4	3	4		√
P62304	Small nuclear ribonucleoprotein E OS=Homo sapiens GN=SNRPE PE=1 SV=1 - [RUXE_HUMAN]	2	2	3	√
B5BTZ8	Small nuclear ribonucleoprotein polypeptide B'' OS=Homo sapiens GN=SNRPB2 PE=2 SV=1 - [B5BTZ8_HUMAN]	1	2	2	√
J3QLE5	Small nuclear ribonucleoprotein-associated protein N (Fragment) OS=Homo sapiens GN=SNRPN PE=1 SV=1 - [J3QLE5_HUMAN]	4	6	6	√
Q5SXM2	snRNA-activating protein complex subunit 4 OS=Homo sapiens GN=SNAPC4 PE=1 SV=1 - [SNPC4_HUMAN]	4	7	8	√
Q01118	Sodium channel protein type 7 subunit alpha OS=Homo sapiens GN=SCN7A PE=1 SV=2 - [SCN7A_HUMAN]	3	2	4			√
Q9UQD0	Sodium channel protein type 8 subunit alpha OS=Homo sapiens GN=SCN8A PE=1 SV=1 - [SCN8A_HUMAN]	3	7	3	√	√	√
Q13733	Sodium/potassium-transporting ATPase subunit alpha-4 OS=Homo sapiens GN=ATP1A4 PE=1 SV=3 - [AT1A4_HUMAN]	13	12	9			√
Q13621	Solute carrier family 12 member 1 OS=Homo sapiens GN=SLC12A1 PE=1 SV=2 - [S12A1_HUMAN]	3	7	8		√	√
Q5H9E4	Solute carrier family 25 member 53 OS=Homo sapiens GN=SLC25A53 PE=2 SV=1 - [S2553_HUMAN]	1	3	1		√
H0YCR8	Sororin (Fragment) OS=Homo sapiens GN=CDCA5 PE=4 SV=1 - [H0YCR8_HUMAN]	1	2	2	√
A8K182	Sortilin-related VPS10 domain containing receptor 1, isoform CRA_d OS=Homo sapiens GN=SORCS1 PE=2 SV=1 - [A8K182_HUMAN]	5	3	4		√	√
E5KRP6	Spastin OS=Homo sapiens GN=SPAST PE=3 SV=1 - [E5KRP6_HUMAN]	3	5	3		√
Q5VX52	Spermatogenesis-associated protein 1 OS=Homo sapiens GN=SPATA1 PE=2 SV=3 - [SPAT1_HUMAN]	3	5	6		√
Q6ZQQ2	Spermatogenesis-associated protein 31D1 OS=Homo sapiens GN=SPATA31D1 PE=2 SV=1 - [S31D1_HUMAN]	9	6	8		√
Q15459	Splicing factor 3A subunit 1 OS=Homo sapiens GN=SF3A1 PE=1 SV=1 - [SF3A1_HUMAN]	6	10	14	√
Q14247	Src substrate cortactin OS=Homo sapiens GN=CTTN PE=1 SV=2 - [SRC8_HUMAN]	14	11	14		√
Q8WWQ8	Stabilin-2 OS=Homo sapiens GN=STAB2 PE=1 SV=3 - [STAB2_HUMAN]	4	5	3		√	√
Q6NT15	STON2 protein (Fragment) OS=Homo sapiens GN=STON2 PE=2 SV=1 - [Q6NT15_HUMAN]	4	3	5		√
Q15772	Striated muscle preferentially expressed protein kinase OS=Homo sapiens GN=SPEG PE=1 SV=4 - [SPEG_HUMAN]	9	6	9	√
A6NHR9	Structural maintenance of chromosomes flexible hinge domain-containing protein 1 OS=Homo sapiens GN=SMCHD1 PE=1 SV=2 - [SMHD1_HUMAN]	5	8	9	√
Q8NDV3	Structural maintenance of chromosomes protein 1B OS=Homo sapiens GN=SMC1B PE=2 SV=2 - [SMC1B_HUMAN]	6	6	5	√
Q8IY92	Structure-specific endonuclease subunit SLX4 OS=Homo sapiens GN=SLX4 PE=1 SV=3 - [SLX4_HUMAN]	2	3	3	√
Q3ZCW5	Succinate-CoA ligase subunit beta (Fragment) OS=Homo sapiens GN=SUCLG2 PE=2 SV=1 - [Q3ZCW5_HUMAN]	4	2	5		√
F5GXA0	Sulfatase-modifying factor 1 OS=Homo sapiens GN=SUMF1 PE=1 SV=1 - [F5GXA0_HUMAN]	3	2	2		√
O60284	Suppression of tumorigenicity 18 protein OS=Homo sapiens GN=ST18 PE=1 SV=1 - [ST18_HUMAN]	6	8	8	√
H0Y6B2	Sushi domain-containing protein 1 (Fragment) OS=Homo sapiens GN=SUSD1 PE=1 SV=1 - [H0Y6B2_HUMAN]	3	5	1			√
Q9UGT4	Sushi domain-containing protein 2 OS=Homo sapiens GN=SUSD2 PE=1 SV=1 - [SUSD2_HUMAN]	2	2	3			√
Q8TER0	Sushi, nidogen and EGF-like domain-containing protein 1 OS=Homo sapiens GN=SNED1 PE=2 SV=2 - [SNED1_HUMAN]	8	3	5			√
Q7L1I2	Synaptic vesicle glycoprotein 2B OS=Homo sapiens GN=SV2B PE=1 SV=1 - [SV2B_HUMAN]	1	2	4		√
B4DMB4	Synaptobrevin-like 1, isoform CRA_a OS=Homo sapiens GN=SYBL1 PE=2 SV=1 - [B4DMB4_HUMAN]	2	2	2		√
O15056	Synaptojanin-2 OS=Homo sapiens GN=SYNJ2 PE=1 SV=3 - [SYNJ2_HUMAN]	6	6	3		√
K7EJ95	Synaptotagmin-5 OS=Homo sapiens GN=SYT5 PE=4 SV=1 - [K7EJ95_HUMAN]	2	1	2		√
D6R9G8	Synphilin-1 (Fragment) OS=Homo sapiens GN=SNCAIP PE=4 SV=2 - [D6R9G8_HUMAN]	6	3	7		√
A7MD96	SYNPO protein (Fragment) OS=Homo sapiens GN=SYNPO PE=2 SV=1 - [A7MD96_HUMAN]	3	8	4		√
O43752	Syntaxin-6 OS=Homo sapiens GN=STX6 PE=1 SV=1 - [STX6_HUMAN]	2	3	2		√
O00186	Syntaxin-binding protein 3 OS=Homo sapiens GN=STXBP3 PE=1 SV=2 - [STXB3_HUMAN]	4	7	4		√
Q9ULW0	Targeting protein for Xklp2 OS=Homo sapiens GN=TPX2 PE=1 SV=2 - [TPX2_HUMAN]	4	5	6	√	√
X6R456	Tau-tubulin kinase 1 OS=Homo sapiens GN=TTBK1 PE=1 SV=1 - [X6R456_HUMAN]	4	5	5		√
Q6IQ55	Tau-tubulin kinase 2 OS=Homo sapiens GN=TTBK2 PE=1 SV=2 - [TTBK2_HUMAN]	7	6	11		√
Q8TC07	TBC1 domain family member 15 OS=Homo sapiens GN=TBC1D15 PE=1 SV=2 - [TBC15_HUMAN]	8	9	8		√
J3KN75	TBC1 domain family member 8B OS=Homo sapiens GN=TBC1D8B PE=1 SV=1 - [J3KN75_HUMAN]	8	4	6		√
B9A6L3	TBC1 domain family, member 12 OS=Homo sapiens GN=TBC1D12 PE=2 SV=1 - [B9A6L3_HUMAN]	3	4	5		√
P78371	T-complex protein 1 subunit beta OS=Homo sapiens GN=CCT2 PE=1 SV=4 - [TCPB_HUMAN]	10	8	9		√
H7C4C8	T-complex protein 1 subunit theta (Fragment) OS=Homo sapiens GN=CCT8 PE=1 SV=1 - [H7C4C8_HUMAN]	8	8	9		√
Q92526	T-complex protein 1 subunit zeta-2 OS=Homo sapiens GN=CCT6B PE=1 SV=5 - [TCPW_HUMAN]	4	5	4		√
J3QSS5	T-complex protein 10A homolog 2 OS=Homo sapiens GN=TCP10L2 PE=4 SV=1 - [J3QSS5_HUMAN]	5	2	5		√
Q8N4U5	T-complex protein 11-like protein 2 OS=Homo sapiens GN=TCP11L2 PE=2 SV=1 - [T11L2_HUMAN]	1	2	2		√
Q6ZSZ6	Teashirt homolog 1 OS=Homo sapiens GN=TSHZ1 PE=1 SV=2 - [TSH1_HUMAN]	7	7	10	√
Q9NRE2	Teashirt homolog 2 OS=Homo sapiens GN=TSHZ2 PE=1 SV=3 - [TSH2_HUMAN]	3	6	3	√
Q7Z6L1	Tectonin beta-propeller repeat-containing protein 1 OS=Homo sapiens GN=TECPR1 PE=1 SV=1 - [TCPR1_HUMAN]	4	2	4		√
Q8NA31	Telomere repeats-binding bouquet formation protein 1 OS=Homo sapiens GN=TERB1 PE=2 SV=3 - [TERB1_HUMAN]	3	3	6	√
Q15554	Telomeric repeat-binding factor 2 OS=Homo sapiens GN=TERF2 PE=1 SV=3 - [TERF2_HUMAN]	2	3	6	√
Q9UKZ4	Teneurin-1 OS=Homo sapiens GN=TENM1 PE=1 SV=2 - [TEN1_HUMAN]	3	3	6	√	√	√
Q9P273	Teneurin-3 OS=Homo sapiens GN=TENM3 PE=2 SV=3 - [TEN3_HUMAN]	9	6	11	√		√
Q6N022	Teneurin-4 OS=Homo sapiens GN=TENM4 PE=1 SV=2 - [TEN4_HUMAN]	5	6	4	√	√	√
Q9P2T0	Testicular haploid expressed gene protein OS=Homo sapiens GN=THEG PE=1 SV=1 - [THEG_HUMAN]	6	3	5	√
H7C5E6	Testis anion transporter 1 (Fragment) OS=Homo sapiens GN=SLC26A8 PE=4 SV=1 - [H7C5E6_HUMAN]	2	2	2		√	√
O43247	Testis-expressed protein 33 OS=Homo sapiens GN=TEX33 PE=2 SV=2 - [TEX33_HUMAN]	4	4	2	√
O15482	Testis-specific protein TEX28 OS=Homo sapiens GN=TEX28 PE=2 SV=1 - [TEX28_HUMAN]	2	2	2			√
Q86VY4	Testis-specific Y-encoded-like protein 5 OS=Homo sapiens GN=TSPYL5 PE=1 SV=2 - [TSYL5_HUMAN]	2	4	3	√
A2A3L6	Tetratricopeptide repeat protein 24 OS=Homo sapiens GN=TTC24 PE=4 SV=1 - [TTC24_HUMAN]	6	6	1		√
Q6PGP7	Tetratricopeptide repeat protein 37 OS=Homo sapiens GN=TTC37 PE=1 SV=1 - [TTC37_HUMAN]	4	8	8		√
Q8WY91	THAP domain-containing protein 4 OS=Homo sapiens GN=THAP4 PE=1 SV=2 - [THAP4_HUMAN]	4	2	6	√
P52888	Thimet oligopeptidase OS=Homo sapiens GN=THOP1 PE=1 SV=2 - [THOP1_HUMAN]	3	2	3		√
O95881	Thioredoxin domain-containing protein 12 OS=Homo sapiens GN=TXNDC12 PE=1 SV=1 - [TXD12_HUMAN]	4	1	2		√
B1ALI9	Thioredoxin interacting protein (Fragment) OS=Homo sapiens GN=TXNIP PE=4 SV=1 - [B1ALI9_HUMAN]	2	2	3		√
Q9H1E5	Thioredoxin-related transmembrane protein 4 OS=Homo sapiens GN=TMX4 PE=1 SV=1 - [TMX4_HUMAN]	4	2	2		√
Q9BW92	Threonine--tRNA ligase, mitochondrial OS=Homo sapiens GN=TARS2 PE=1 SV=1 - [SYTM_HUMAN]	4	3	4		√
C9JKN6	Thrombospondin type-1 domain-containing protein 7B OS=Homo sapiens GN=THSD7B PE=1 SV=3 - [C9JKN6_HUMAN]	4	2	4			√
D6W5K2	Thymosin, beta 10, isoform CRA_a (Fragment) OS=Homo sapiens GN=TMSB10 PE=4 SV=1 - [D6W5K2_HUMAN]	2	2	4		√
Q6YHU6	Thyroid adenoma-associated protein OS=Homo sapiens GN=THADA PE=1 SV=1 - [THADA_HUMAN]	6	6	8	√
Q9UKU6	Thyrotropin-releasing hormone-degrading ectoenzyme OS=Homo sapiens GN=TRHDE PE=2 SV=1 - [TRHDE_HUMAN]	2	2	1		√
Q96MW7	Tigger transposable element-derived protein 1 OS=Homo sapiens GN=TIGD1 PE=1 SV=1 - [TIGD1_HUMAN]	5	3	2	√
A1L0S7	TNS1 protein (Fragment) OS=Homo sapiens GN=TNS1 PE=2 SV=2 - [A1L0S7_HUMAN]	5	3	7		√	√
Q9UKE5	TRAF2 and NCK-interacting protein kinase OS=Homo sapiens GN=TNIK PE=1 SV=1 - [TNIK_HUMAN]	6	5	9	√	√
O43617	Trafficking protein particle complex subunit 3 OS=Homo sapiens GN=TRAPPC3 PE=1 SV=1 - [TPPC3_HUMAN]	3	2	3		√
O14545	TRAF-type zinc finger domain-containing protein 1 OS=Homo sapiens GN=TRAFD1 PE=1 SV=1 - [TRAD1_HUMAN]	4	2	5		√
O75764	Transcription elongation factor A protein 3 OS=Homo sapiens GN=TCEA3 PE=1 SV=2 - [TCEA3_HUMAN]	3	5	4	√
G3V220	Transcription elongation regulator 1 OS=Homo sapiens GN=TCERG1 PE=1 SV=1 - [G3V220_HUMAN]	5	7	4	√
O00716	Transcription factor E2F3 OS=Homo sapiens GN=E2F3 PE=1 SV=1 - [E2F3_HUMAN]	2	2	7	√
P31629	Transcription factor HIVEP2 OS=Homo sapiens GN=HIVEP2 PE=1 SV=2 - [ZEP2_HUMAN]	5	2	6	√
P48380	Transcription factor RFX3 OS=Homo sapiens GN=RFX3 PE=1 SV=2 - [RFX3_HUMAN]	3	3	3	√
Q33E94	Transcription factor RFX4 OS=Homo sapiens GN=RFX4 PE=1 SV=2 - [RFX4_HUMAN]	1	2	5	√
P35716	Transcription factor SOX-11 OS=Homo sapiens GN=SOX11 PE=1 SV=2 - [SOX11_HUMAN]	5	7	4	√
P35712	Transcription factor SOX-6 OS=Homo sapiens GN=SOX6 PE=1 SV=3 - [SOX6_HUMAN]	4	4	4	√
P29084	Transcription initiation factor IIE subunit beta OS=Homo sapiens GN=GTF2E2 PE=1 SV=1 - [T2EB_HUMAN]	6	3	7	√
Q5VWG9	Transcription initiation factor TFIID subunit 3 OS=Homo sapiens GN=TAF3 PE=1 SV=1 - [TAF3_HUMAN]	3	3	7	√
P46100	Transcriptional regulator ATRX OS=Homo sapiens GN=ATRX PE=1 SV=5 - [ATRX_HUMAN]	16	13	23	√
Q6IEH8	Transcriptional regulator OS=Homo sapiens GN=NIPBL PE=2 SV=1 - [Q6IEH8_HUMAN]	15	14	22	√
P49711	Transcriptional repressor CTCF OS=Homo sapiens GN=CTCF PE=1 SV=1 - [CTCF_HUMAN]	1	3	3	√
Q12986	Transcriptional repressor NF-X1 OS=Homo sapiens GN=NFX1 PE=1 SV=2 - [NFX1_HUMAN]	6	4	10	√
Q12788	Transducin beta-like protein 3 OS=Homo sapiens GN=TBL3 PE=1 SV=2 - [TBL3_HUMAN]	4	2	4	√
Q13595	Transformer-2 protein homolog alpha OS=Homo sapiens GN=TRA2A PE=1 SV=1 - [TRA2A_HUMAN]	5	4	6	√
A2A3F7	Transient receptor potential cation channel subfamily M member 3 OS=Homo sapiens GN=TRPM3 PE=1 SV=1 - [A2A3F7_HUMAN]	6	6	9		√	√
Q8TD43	Transient receptor potential cation channel subfamily M member 4 OS=Homo sapiens GN=TRPM4 PE=1 SV=1 - [TRPM4_HUMAN]	7	2	4		√	√
Q9BX84	Transient receptor potential cation channel subfamily M member 6 OS=Homo sapiens GN=TRPM6 PE=1 SV=2 - [TRPM6_HUMAN]	6	6	7			√
Q9NR50	Translation initiation factor eIF-2B subunit gamma OS=Homo sapiens GN=EIF2B3 PE=1 SV=1 - [EI2BG_HUMAN]	7	7	4		√
P49755	Transmembrane emp24 domain-containing protein 10 OS=Homo sapiens GN=TMED10 PE=1 SV=2 - [TMEDA_HUMAN]	4	4	8		√
F2Z3N7	Transmembrane protein 106B OS=Homo sapiens GN=TMEM106B PE=1 SV=1 - [F2Z3N7_HUMAN]	1	1	1		√	√
F5H465	Transmembrane protein 120B OS=Homo sapiens GN=TMEM120B PE=4 SV=1 - [F5H465_HUMAN]	2	1	2	√		√
C9JQI7	Transmembrane protein 232 OS=Homo sapiens GN=TMEM232 PE=2 SV=2 - [TM232_HUMAN]	6	4	5			√
B1AL88	Transmembrane protein FAM155A OS=Homo sapiens GN=FAM155A PE=2 SV=1 - [F155A_HUMAN]	3	3	4			√
Q5T2D2	Trem-like transcript 2 protein OS=Homo sapiens GN=TREML2 PE=1 SV=2 - [TRML2_HUMAN]	1	2	2			√
Q13061	Triadin OS=Homo sapiens GN=TRDN PE=1 SV=4 - [TRDN_HUMAN]	5	4	5		√	√
P22102	Trifunctional purine biosynthetic protein adenosine-3 OS=Homo sapiens GN=GART PE=1 SV=1 - [PUR2_HUMAN]	8	6	6		√
H9KVB4	Trinucleotide repeat-containing gene 18 protein OS=Homo sapiens GN=TNRC18 PE=1 SV=1 - [H9KVB4_HUMAN]	19	11	22	√	√
Q96LD4	Tripartite motif-containing protein 47 OS=Homo sapiens GN=TRIM47 PE=1 SV=2 - [TRI47_HUMAN]	3	4	5	√	√
J3KQW6	Tripartite motif-containing protein 73 OS=Homo sapiens GN=TRIM73 PE=4 SV=1 - [J3KQW6_HUMAN]	3	1	2	√	√
Q32P41	tRNA (guanine(37)-N1)-methyltransferase OS=Homo sapiens GN=TRMT5 PE=1 SV=2 - [TRM5_HUMAN]	3	3	2	√
F2WSI7	Truncated dystrophin protein (Fragment) OS=Homo sapiens GN=DMD PE=4 SV=1 - [F2WSI7_HUMAN]	1	1	2		√	√
I6L9D0	TTLL7 protein OS=Homo sapiens GN=TTLL7 PE=2 SV=1 - [I6L9D0_HUMAN]	4	2	3		√	√
O75347	Tubulin-specific chaperone A OS=Homo sapiens GN=TBCA PE=1 SV=3 - [TBCA_HUMAN]	2	3	2		√
Q8N523	Tuftelin-interacting protein 11 OS=Homo sapiens GN=TFIP11 PE=2 SV=1 - [Q8N523_HUMAN]	5	5	6	√	√
Q9Y275	Tumor necrosis factor ligand superfamily member 13B OS=Homo sapiens GN=TNFSF13B PE=1 SV=1 - [TN13B_HUMAN]	2	2	2		√	√
Q2TAM9	Tumor suppressor candidate gene 1 protein OS=Homo sapiens GN=TUSC1 PE=1 SV=3 - [TUSC1_HUMAN]	7	6	3	√	√
Q7KYT4	Type I phosphatidylinositol-4-phosphate 5-kinase beta (Fragment) OS=Homo sapiens GN=STM7 PE=2 SV=1 - [Q7KYT4_HUMAN]	3	4	4		√
Q05D26	Tyrosine-protein kinase (Fragment) OS=Homo sapiens GN=BLK PE=2 SV=1 - [Q05D26_HUMAN]	5	4	3		√
Q6NUK7	Tyrosine-protein kinase (Fragment) OS=Homo sapiens GN=LYN PE=2 SV=1 - [Q6NUK7_HUMAN]	10	5	7		√
Q16176	Tyrosine-protein kinase OS=Homo sapiens GN=lsk PE=2 SV=1 - [Q16176_HUMAN]	4	2	3		√
G5EKE5	Tyrosine-protein kinase receptor OS=Homo sapiens GN=PPFIBP1-ALK PE=2 SV=1 - [G5EKE5_HUMAN]	3	6	7		√
Q86YV5	Tyrosine-protein kinase SgK223 OS=Homo sapiens GN=SGK223 PE=1 SV=4 - [SG223_HUMAN]	4	4	4		√
Q05209	Tyrosine-protein phosphatase non-receptor type 12 OS=Homo sapiens GN=PTPN12 PE=1 SV=3 - [PTN12_HUMAN]	2	2	3		√
P09234	U1 small nuclear ribonucleoprotein C OS=Homo sapiens GN=SNRPC PE=1 SV=1 - [RU1C_HUMAN]	1	1	1	√
B5BU08	U2 small nuclear RNA auxillary factor 1 isoform a OS=Homo sapiens GN=U2AF1 PE=2 SV=1 - [B5BU08_HUMAN]	3	4	5	√
O43818	U3 small nucleolar RNA-interacting protein 2 OS=Homo sapiens GN=RRP9 PE=1 SV=1 - [U3IP2_HUMAN]	6	4	4	√
Q9NPG3	Ubinuclein-1 OS=Homo sapiens GN=UBN1 PE=1 SV=2 - [UBN1_HUMAN]	5	3	9	√
Q9UHP3	Ubiquitin carboxyl-terminal hydrolase 25 OS=Homo sapiens GN=USP25 PE=1 SV=4 - [UBP25_HUMAN]	7	5	5	√
Q70CQ2	Ubiquitin carboxyl-terminal hydrolase 34 OS=Homo sapiens GN=USP34 PE=1 SV=2 - [UBP34_HUMAN]	8	6	7	√
Q9P2H5	Ubiquitin carboxyl-terminal hydrolase 35 OS=Homo sapiens GN=USP35 PE=1 SV=3 - [UBP35_HUMAN]	3	5	7	√
A4D2N7	Ubiquitin specific protease 42 OS=Homo sapiens GN=USP42 PE=3 SV=1 - [A4D2N7_HUMAN]	4	5	5	√
P22314	Ubiquitin-like modifier-activating enzyme 1 OS=Homo sapiens GN=UBA1 PE=1 SV=3 - [UBA1_HUMAN]	12	13	13	√
Q9NYU1	UDP-glucose:glycoprotein glucosyltransferase 2 OS=Homo sapiens GN=UGGT2 PE=1 SV=4 - [UGGG2_HUMAN]	8	11	9		√
E9PDF6	Unconventional myosin-Ib OS=Homo sapiens GN=MYO1B PE=1 SV=1 - [E9PDF6_HUMAN]	13	8	10		√	√
B0I1T2	Unconventional myosin-Ig OS=Homo sapiens GN=MYO1G PE=1 SV=2 - [MYO1G_HUMAN]	4	5	3		√	√
G3V394	Unconventional myosin-Va OS=Homo sapiens GN=MYO5A PE=1 SV=1 - [G3V394_HUMAN]	16	18	22		√	√
F5H7K1	UPF0505 protein C16orf62 OS=Homo sapiens GN=C16orf62 PE=1 SV=1 - [F5H7K1_HUMAN]	10	5	9		√	√
Q9HCM3	UPF0606 protein KIAA1549 OS=Homo sapiens GN=KIAA1549 PE=1 SV=4 - [K1549_HUMAN]	3	3	4	√		√
V9GYR5	Upstream stimulatory factor 2 OS=Homo sapiens GN=USF2 PE=1 SV=1 - [V9GYR5_HUMAN]	1	2	2	√
Q08E77	UTP14, U3 small nucleolar ribonucleoprotein, homolog C (Yeast) OS=Homo sapiens GN=UTP14C PE=1 SV=1 - [Q08E77_HUMAN]	4	7	5		√
Q96RL7	Vacuolar protein sorting-associated protein 13A OS=Homo sapiens GN=VPS13A PE=1 SV=2 - [VP13A_HUMAN]	9	10	11		√
Q5THJ4	Vacuolar protein sorting-associated protein 13D OS=Homo sapiens GN=VPS13D PE=1 SV=2 - [VP13D_HUMAN]	15	15	10		√
Q9P253	Vacuolar protein sorting-associated protein 18 homolog OS=Homo sapiens GN=VPS18 PE=1 SV=2 - [VPS18_HUMAN]	3	4	9		√
P17948	Vascular endothelial growth factor receptor 1 OS=Homo sapiens GN=FLT1 PE=1 SV=2 - [VGFR1_HUMAN]	9	4	8		√	√
Q9Y3E0	Vesicle transport protein GOT1B OS=Homo sapiens GN=GOLT1B PE=1 SV=1 - [GOT1B_HUMAN]	3	3	3		√
P58304	Visual system homeobox 2 OS=Homo sapiens GN=VSX2 PE=1 SV=1 - [VSX2_HUMAN]	4	4	3	√
Q8WXS5	Voltage-dependent calcium channel gamma-8 subunit OS=Homo sapiens GN=CACNG8 PE=2 SV=3 - [CCG8_HUMAN]	4	3	5			√
A6NCI4	von Willebrand factor A domain-containing protein 3A OS=Homo sapiens GN=VWA3A PE=2 SV=3 - [VWA3A_HUMAN]	7	3	5		√	√
Q502W6	von Willebrand factor A domain-containing protein 3B OS=Homo sapiens GN=VWA3B PE=1 SV=3 - [VWA3B_HUMAN]	3	7	8		√
P38606	V-type proton ATPase catalytic subunit A OS=Homo sapiens GN=ATP6V1A PE=1 SV=2 - [VATA_HUMAN]	5	5	8		√	√
J3QL14	V-type proton ATPase subunit d 1 (Fragment) OS=Homo sapiens GN=ATP6V0D1 PE=1 SV=1 - [J3QL14_HUMAN]	4	2	3		√	√
A0AVI9	WD repeat domain 78 OS=Homo sapiens GN=WDR78 PE=2 SV=1 - [A0AVI9_HUMAN]	6	3	6		√
Q96S15	WD repeat-containing protein 24 OS=Homo sapiens GN=WDR24 PE=1 SV=1 - [WDR24_HUMAN]	6	2	2		√
Q96KV7	WD repeat-containing protein 90 OS=Homo sapiens GN=WDR90 PE=1 SV=2 - [WDR90_HUMAN]	7	7	5		√
Q14191	Werner syndrome ATP-dependent helicase OS=Homo sapiens GN=WRN PE=1 SV=2 - [WRN_HUMAN]	3	5	5	√
O76024	Wolframin OS=Homo sapiens GN=WFS1 PE=1 SV=2 - [WFS1_HUMAN]	6	6	5		√
Q96MU7	YTH domain-containing protein 1 OS=Homo sapiens GN=YTHDC1 PE=1 SV=3 - [YTDC1_HUMAN]	3	3	4	√
P10073	Zinc finger and SCAN domain-containing protein 22 OS=Homo sapiens GN=ZSCAN22 PE=1 SV=2 - [ZSC22_HUMAN]	1	2	1	√
Q96K80	Zinc finger CCCH domain-containing protein 10 OS=Homo sapiens GN=ZC3H10 PE=1 SV=1 - [ZC3HA_HUMAN]	1	2	1	√
Q5T200	Zinc finger CCCH domain-containing protein 13 OS=Homo sapiens GN=ZC3H13 PE=1 SV=1 - [ZC3HD_HUMAN]	7	7	7	√
Q8IXZ2	Zinc finger CCCH domain-containing protein 3 OS=Homo sapiens GN=ZC3H3 PE=1 SV=3 - [ZC3H3_HUMAN]	7	9	3	√
Q68DK2	Zinc finger FYVE domain-containing protein 26 OS=Homo sapiens GN=ZFYVE26 PE=1 SV=3 - [ZFY26_HUMAN]	7	9	8	√
Q5VZL5	Zinc finger MYM-type protein 4 OS=Homo sapiens GN=ZMYM4 PE=1 SV=1 - [ZMYM4_HUMAN]	8	5	4	√
C9JUQ8	Zinc finger MYND domain-containing protein 10 (Fragment) OS=Homo sapiens GN=ZMYND10 PE=1 SV=1 - [C9JUQ8_HUMAN]	2	1	2	√
Q9H2Y7	Zinc finger protein 106 OS=Homo sapiens GN=ZNF106 PE=1 SV=1 - [ZN106_HUMAN]	10	4	14	√
Q13360	Zinc finger protein 177 OS=Homo sapiens GN=ZNF177 PE=1 SV=4 - [ZN177_HUMAN]	4	2	4	√
A0JNV5	Zinc finger protein 28 homolog (Mouse) OS=Homo sapiens GN=ZFP28 PE=2 SV=1 - [A0JNV5_HUMAN]	5	5	6	√
Q9Y6Q3	Zinc finger protein 37 homolog OS=Homo sapiens GN=ZFP37 PE=2 SV=3 - [ZFP37_HUMAN]	4	2	5	√
K7EIP5	Zinc finger protein 506 OS=Homo sapiens GN=ZNF506 PE=4 SV=1 - [K7EIP5_HUMAN]	1	1	2	√
Q96K75	Zinc finger protein 514 OS=Homo sapiens GN=ZNF514 PE=2 SV=1 - [ZN514_HUMAN]	2	2	3	√
Q6AHZ1	Zinc finger protein 518A OS=Homo sapiens GN=ZNF518A PE=1 SV=2 - [Z518A_HUMAN]	10	9	8	√
Q9C0D4	Zinc finger protein 518B OS=Homo sapiens GN=ZNF518B PE=2 SV=2 - [Z518B_HUMAN]	5	5	4	√
Q6P9A3	Zinc finger protein 549 OS=Homo sapiens GN=ZNF549 PE=2 SV=2 - [ZN549_HUMAN]	2	2	1	√
Q969S3	Zinc finger protein 622 OS=Homo sapiens GN=ZNF622 PE=1 SV=1 - [ZN622_HUMAN]	5	7	7	√
Q8N1G0	Zinc finger protein 687 OS=Homo sapiens GN=ZNF687 PE=1 SV=1 - [ZN687_HUMAN]	4	4	7	√
Q9H7S9	Zinc finger protein 703 OS=Homo sapiens GN=ZNF703 PE=1 SV=1 - [ZN703_HUMAN]	5	2	4	√
Q32MQ0	Zinc finger protein 750 OS=Homo sapiens GN=ZNF750 PE=1 SV=1 - [ZN750_HUMAN]	3	1	3	√
Q5FWF6	Zinc finger protein 789 OS=Homo sapiens GN=ZNF789 PE=2 SV=3 - [ZN789_HUMAN]	4	4	5	√
H0Y9M2	Zinc finger protein 827 (Fragment) OS=Homo sapiens GN=ZNF827 PE=4 SV=1 - [H0Y9M2_HUMAN]	2	1	1	√
O60290	Zinc finger protein 862 OS=Homo sapiens GN=ZNF862 PE=2 SV=2 - [ZN862_HUMAN]	4	3	5	√
P10075	Zinc finger protein GLI4 OS=Homo sapiens GN=GLI4 PE=1 SV=2 - [GLI4_HUMAN]	2	3	2	√
Q8IX07	Zinc finger protein ZFPM1 OS=Homo sapiens GN=ZFPM1 PE=1 SV=2 - [FOG1_HUMAN]	5	4	7	√
O95218	Zinc finger Ran-binding domain-containing protein 2 OS=Homo sapiens GN=ZRANB2 PE=1 SV=2 - [ZRAB2_HUMAN]	4	5	5	√
Q9UPR6	Zinc finger RNA-binding protein 2 OS=Homo sapiens GN=ZFR2 PE=2 SV=3 - [ZFR2_HUMAN]	2	3	4	√

## Sheet: Ac36AzGlcNAc
Accession	gene name	Exp1	Exp2	Exp3	nucleus	cytoplasm	extracellular or luminal
A0A5E8	GAS2-like protein 1 OS=Homo sapiens GN=GAS2L1 PE=1 SV=1 - [A0A5E8_HUMAN]	6	6	3		√
A0AVI9	WD repeat domain 78 OS=Homo sapiens GN=WDR78 PE=2 SV=1 - [A0AVI9_HUMAN]	6	6	4	√	√
A0JLU2	BUB1 protein (Fragment) OS=Homo sapiens GN=BUB1 PE=2 SV=1 - [A0JLU2_HUMAN]	9	3	3	√
A0JNV5	Zinc finger protein 28 homolog (Mouse) OS=Homo sapiens GN=ZFP28 PE=2 SV=1 - [A0JNV5_HUMAN]	6	3	4	√
A0JNW5	UHRF1-binding protein 1-like OS=Homo sapiens GN=UHRF1BP1L PE=1 SV=2 - [UH1BL_HUMAN]	4	8	6		√	√
A0JP10	Excision repair cross-complementing rodent repair deficiency, complementation group 6 OS=Homo sapiens GN=ERCC6 PE=2 SV=1 - [A0JP10_HUMAN]	11	7	5	√
A0PJB2	CDT1 protein (Fragment) OS=Homo sapiens GN=CDT1 PE=2 SV=1 - [A0PJB2_HUMAN]	2	5	3	√
A0PJK1	Sodium/glucose cotransporter 5 OS=Homo sapiens GN=SLC5A10 PE=1 SV=2 - [SC5AA_HUMAN]	4	3	3			√
A1JUI8	Chaperonin subunit 6A (Fragment) OS=Homo sapiens GN=CCT6A PE=2 SV=1 - [A1JUI8_HUMAN]	11	10	11		√
A1L0S7	TNS1 protein (Fragment) OS=Homo sapiens GN=TNS1 PE=2 SV=2 - [A1L0S7_HUMAN]	10	7	8		√	√
A2A3L6	Tetratricopeptide repeat protein 24 OS=Homo sapiens GN=TTC24 PE=4 SV=1 - [TTC24_HUMAN]	3	4	4	√	√
A2AJT9	Uncharacterized protein CXorf23 OS=Homo sapiens GN=CXorf23 PE=1 SV=1 - [CX023_HUMAN]	2	5	3		√
A2RTX5	Probable threonine--tRNA ligase 2, cytoplasmic OS=Homo sapiens GN=TARSL2 PE=1 SV=1 - [SYTC2_HUMAN]	5	8	6		√
A3F768	NF-kappaB repressing factor OS=Homo sapiens GN=NRF PE=2 SV=1 - [A3F768_HUMAN]	5	6	9	√	√
A3KN83	Protein strawberry notch homolog 1 OS=Homo sapiens GN=SBNO1 PE=1 SV=1 - [SBNO1_HUMAN]	7	6	7	√
A4D0S4	Laminin subunit beta-4 OS=Homo sapiens GN=LAMB4 PE=2 SV=1 - [LAMB4_HUMAN]	9	5	3			√
A4FVA6	MTCH1 protein (Fragment) OS=Homo sapiens GN=MTCH1 PE=2 SV=1 - [A4FVA6_HUMAN]	6	3	5		√
A5YM53	ITGAV protein OS=Homo sapiens GN=ITGAV PE=2 SV=1 - [A5YM53_HUMAN]	3	3	3		√	√
A6H8W6	SIPA1L1 protein OS=Homo sapiens GN=SIPA1L1 PE=2 SV=1 - [A6H8W6_HUMAN]	8	8	12		√
A6NC57	Ankyrin repeat domain-containing protein 62 OS=Homo sapiens GN=ANKRD62 PE=2 SV=4 - [ANR62_HUMAN]	6	6	8	√
A6NCI4	von Willebrand factor A domain-containing protein 3A OS=Homo sapiens GN=VWA3A PE=2 SV=3 - [VWA3A_HUMAN]	2	5	3		√	√
A6NCM1	IQ and AAA domain-containing protein 1-like OS=Homo sapiens GN=IQCA1L PE=3 SV=2 - [IQCAL_HUMAN]	2	2	4		√
A6NCS4	Homeobox protein Nkx-2.6 OS=Homo sapiens GN=NKX2-6 PE=1 SV=1 - [NKX26_HUMAN]	3	2	2	√
A6NEL2	Ankyrin repeat domain-containing protein SOWAHB OS=Homo sapiens GN=SOWAHB PE=1 SV=1 - [SWAHB_HUMAN]	4	7	6	√
A6NF51	3'(2'),5'-bisphosphate nucleotidase 1 OS=Homo sapiens GN=BPNT1 PE=1 SV=2 - [A6NF51_HUMAN]	2	3	6		√
A6NGQ3	Obscurin OS=Homo sapiens GN=OBSCN PE=1 SV=5 - [A6NGQ3_HUMAN]	23	21	25		√
A6NHL2	Tubulin alpha chain-like 3 OS=Homo sapiens GN=TUBAL3 PE=1 SV=2 - [TBAL3_HUMAN]	5	4	5		√
A6NHQ2	rRNA/tRNA 2'-O-methyltransferase fibrillarin-like protein 1 OS=Homo sapiens GN=FBLL1 PE=3 SV=2 - [FBLL1_HUMAN]	9	9	6	√
A6NHR9	Structural maintenance of chromosomes flexible hinge domain-containing protein 1 OS=Homo sapiens GN=SMCHD1 PE=1 SV=2 - [SMHD1_HUMAN]	6	5	4	√
A6NKL6	Transmembrane protein 200C OS=Homo sapiens GN=TMEM200C PE=2 SV=2 - [T200C_HUMAN]	3	3	3		√	√
A6NN50	Obscurin-like protein 1 OS=Homo sapiens GN=OBSL1 PE=1 SV=1 - [A6NN50_HUMAN]	9	8	5		√
A6NNK5	Tumor suppressor p53-binding protein 1 OS=Homo sapiens GN=TP53BP1 PE=1 SV=2 - [A6NNK5_HUMAN]	6	5	5	√
A6PVS8	Leucine-rich repeat and IQ domain-containing protein 3 OS=Homo sapiens GN=LRRIQ3 PE=1 SV=1 - [LRIQ3_HUMAN]	3	3	3		√
A6QL63	Ankyrin repeat and BTB/POZ domain-containing protein BTBD11 OS=Homo sapiens GN=BTBD11 PE=2 SV=3 - [BTBDB_HUMAN]	2	6	3	√	√
A7E2F7	CAP-GLY domain containing linker protein 2 OS=Homo sapiens GN=CLIP2 PE=2 SV=1 - [A7E2F7_HUMAN]	8	9	7		√
A7E2X1	PPM1E protein OS=Homo sapiens GN=PPM1E PE=2 SV=1 - [A7E2X1_HUMAN]	3	3	1	√	√
A8K182	Sortilin-related VPS10 domain containing receptor 1, isoform CRA_d OS=Homo sapiens GN=SORCS1 PE=2 SV=1 - [A8K182_HUMAN]	2	2	2		√	√
A8MVX0	Rho guanine nucleotide exchange factor 33 OS=Homo sapiens GN=ARHGEF33 PE=2 SV=2 - [ARG33_HUMAN]	4	2	5	√	√
B1AJZ9	Forkhead-associated domain-containing protein 1 OS=Homo sapiens GN=FHAD1 PE=2 SV=2 - [FHAD1_HUMAN]	22	11	9	√	√
B1AK87	Capping protein (Actin filament) muscle Z-line, beta, isoform CRA_a OS=Homo sapiens GN=CAPZB PE=1 SV=1 - [B1AK87_HUMAN]	6	4	8		√
B1B5Y4	Deleted in lung and esophageal cancer protein 1 (Fragment) OS=Homo sapiens GN=DLEC1 PE=2 SV=1 - [B1B5Y4_HUMAN]	4	3	4		√
B1WB49	BDP1 protein (Fragment) OS=Homo sapiens GN=BDP1 PE=2 SV=1 - [B1WB49_HUMAN]	16	11	9	√
B2RNR6	Zinc finger RNA binding protein OS=Homo sapiens GN=ZFR PE=2 SV=1 - [B2RNR6_HUMAN]	7	6	8	√	√
B2RWN8	Histone acetyltransferase OS=Homo sapiens GN=MYST4 PE=2 SV=1 - [B2RWN8_HUMAN]	6	2	5	√
B3GQS7	Mitochondrial heat shock 60kD protein 1 variant 1 OS=Homo sapiens GN=HSPD1 PE=2 SV=1 - [B3GQS7_HUMAN]	25	26	25		√
B4DEG2	P2X purinoceptor OS=Homo sapiens GN=P2RX5 PE=1 SV=1 - [B4DEG2_HUMAN]	3	4	4	√	√	√
B4DKR0	Syntaxin 5A, isoform CRA_c OS=Homo sapiens GN=STX5A PE=2 SV=1 - [B4DKR0_HUMAN]	4	2	3		√
B4DMT5	Eukaryotic translation initiation factor 3 subunit F OS=Homo sapiens GN=EIF3F PE=2 SV=1 - [B4DMT5_HUMAN]	4	3	4		√
B4DSN5	Tyrosine-protein phosphatase non-receptor type OS=Homo sapiens GN=PTPN1 PE=1 SV=1 - [B4DSN5_HUMAN]	3	3	2		√
B4DV59	REST corepressor 3 OS=Homo sapiens GN=RCOR3 PE=1 SV=1 - [B4DV59_HUMAN]	3	2	1	√
B4DXS3	Armadillo repeat-containing protein 3 OS=Homo sapiens GN=ARMC3 PE=1 SV=1 - [B4DXS3_HUMAN]	5	8	5	√	√
Q7RTP6	[F-actin]-methionine sulfoxide oxidase MICAL3 OS=Homo sapiens GN=MICAL3 PE=1 SV=2 - [MICA3_HUMAN]	12	10	12		√
Q16698	2,4-dienoyl-CoA reductase, mitochondrial OS=Homo sapiens GN=DECR1 PE=1 SV=1 - [DECR_HUMAN]	2	4	3		√
P35998	26S protease regulatory subunit 7 OS=Homo sapiens GN=PSMC2 PE=1 SV=3 - [PRS7_HUMAN]	11	9	6	√	√
O00487	26S proteasome non-ATPase regulatory subunit 14 OS=Homo sapiens GN=PSMD14 PE=1 SV=1 - [PSDE_HUMAN]	3	5	5	√	√
Q13200	26S proteasome non-ATPase regulatory subunit 2 OS=Homo sapiens GN=PSMD2 PE=1 SV=3 - [PSMD2_HUMAN]	20	20	19	√	√
H0Y8N7	39S ribosomal protein L1, mitochondrial (Fragment) OS=Homo sapiens GN=MRPL1 PE=1 SV=1 - [H0Y8N7_HUMAN]	1	2	2		√
P31937	3-hydroxyisobutyrate dehydrogenase, mitochondrial OS=Homo sapiens GN=HIBADH PE=1 SV=2 - [3HIDH_HUMAN]	4	2	3		√
P46783	40S ribosomal protein S10 OS=Homo sapiens GN=RPS10 PE=1 SV=1 - [RS10_HUMAN]	5	4	5	√	√
H0YEN5	40S ribosomal protein S2 (Fragment) OS=Homo sapiens GN=RPS2 PE=1 SV=1 - [H0YEN5_HUMAN]	10	9	10	√	√
Q13131	5'-AMP-activated protein kinase catalytic subunit alpha-1 OS=Homo sapiens GN=PRKAA1 PE=1 SV=4 - [AAPK1_HUMAN]	4	4	5	√	√
H7C519	5'-nucleotidase domain-containing protein 2 (Fragment) OS=Homo sapiens GN=NT5DC2 PE=1 SV=1 - [H7C519_HUMAN]	1	1	1		√
C9JL25	60 kDa heat shock protein, mitochondrial (Fragment) OS=Homo sapiens GN=HSPD1 PE=1 SV=1 - [C9JL25_HUMAN]	6	8	5		√
G3V1Y8	60 kDa lysophospholipase OS=Homo sapiens GN=ASPG PE=1 SV=1 - [G3V1Y8_HUMAN]	3	2	2		√
P27635	60S ribosomal protein L10 OS=Homo sapiens GN=RPL10 PE=1 SV=4 - [RL10_HUMAN]	12	12	11		√
P46778	60S ribosomal protein L21 OS=Homo sapiens GN=RPL21 PE=1 SV=2 - [RL21_HUMAN]	3	2	4		√
C9JXB8	60S ribosomal protein L24 OS=Homo sapiens GN=RPL24 PE=1 SV=1 - [C9JXB8_HUMAN]	3	3	3		√
J3KQN4	60S ribosomal protein L36a OS=Homo sapiens GN=RPL36A PE=3 SV=1 - [J3KQN4_HUMAN]	3	1	3		√
Q76LX8	A disintegrin and metalloproteinase with thrombospondin motifs 13 OS=Homo sapiens GN=ADAMTS13 PE=1 SV=1 - [ATS13_HUMAN]	7	4	6		√
Q8WXS8	A disintegrin and metalloproteinase with thrombospondin motifs 14 OS=Homo sapiens GN=ADAMTS14 PE=2 SV=2 - [ATS14_HUMAN]	2	6	3		√
Q8TE58	A disintegrin and metalloproteinase with thrombospondin motifs 15 OS=Homo sapiens GN=ADAMTS15 PE=2 SV=1 - [ATS15_HUMAN]	5	3	4		√
Q9P2N4	A disintegrin and metalloproteinase with thrombospondin motifs 9 OS=Homo sapiens GN=ADAMTS9 PE=1 SV=4 - [ATS9_HUMAN]	4	5	8		√
Q2L6I2	ABC50 protein OS=Homo sapiens GN=ABCF1 PE=4 SV=1 - [Q2L6I2_HUMAN]	11	8	7	√	√
I7JB59	ABCG2 protein OS=Homo sapiens GN=ABCG2 PE=4 SV=1 - [I7JB59_HUMAN]	4	2	2	√	√	√
Q8IZT6	Abnormal spindle-like microcephaly-associated protein OS=Homo sapiens GN=ASPM PE=1 SV=2 - [ASPM_HUMAN]	13	14	7	√	√
P68032	Actin, alpha cardiac muscle 1 OS=Homo sapiens GN=ACTC1 PE=1 SV=1 - [ACTC_HUMAN]	20	23	21		√
Q5U623	Activating transcription factor 7-interacting protein 2 OS=Homo sapiens GN=ATF7IP2 PE=1 SV=2 - [MCAF2_HUMAN]	3	5	5	√
Q9H845	Acyl-CoA dehydrogenase family member 9, mitochondrial OS=Homo sapiens GN=ACAD9 PE=1 SV=1 - [ACAD9_HUMAN]	4	7	5		√
Q9Y305	Acyl-coenzyme A thioesterase 9, mitochondrial OS=Homo sapiens GN=ACOT9 PE=1 SV=2 - [ACOT9_HUMAN]	3	7	5		√
O43306	Adenylate cyclase type 6 OS=Homo sapiens GN=ADCY6 PE=1 SV=2 - [ADCY6_HUMAN]	4	6	3		√	√
Q8N142	Adenylosuccinate synthetase isozyme 1 OS=Homo sapiens GN=ADSSL1 PE=1 SV=1 - [PURA1_HUMAN]	4	4	3		√
Q9UKB5	Adherens junction-associated protein 1 OS=Homo sapiens GN=AJAP1 PE=1 SV=1 - [AJAP1_HUMAN]	1	1	2			√
Q8IZF6	Adhesion G-protein coupled receptor G4 OS=Homo sapiens GN=ADGRG4 PE=2 SV=2 - [AGRG4_HUMAN]	3	9	4			√
P61204	ADP-ribosylation factor 3 OS=Homo sapiens GN=ARF3 PE=1 SV=2 - [ARF3_HUMAN]	11	11	14		√
O75366	Advillin OS=Homo sapiens GN=AVIL PE=1 SV=3 - [AVIL_HUMAN]	8	5	5		√
Q9UHB7	AF4/FMR2 family member 4 OS=Homo sapiens GN=AFF4 PE=1 SV=1 - [AFF4_HUMAN]	3	4	7	√
J3KN01	Afadin OS=Homo sapiens GN=AFDN PE=1 SV=1 - [J3KN01_HUMAN]	13	14	14	√	√	√
Q02952	A-kinase anchor protein 12 OS=Homo sapiens GN=AKAP12 PE=1 SV=4 - [AKA12_HUMAN]	7	5	6		√
Q56A86	AKT3 protein (Fragment) OS=Homo sapiens GN=AKT3 PE=2 SV=1 - [Q56A86_HUMAN]	2	4	2		√	√
H0YC11	Alpha-1,3-mannosyl-glycoprotein 4-beta-N-acetylglucosaminyltransferase B (Fragment) OS=Homo sapiens GN=MGAT4B PE=1 SV=1 - [H0YC11_HUMAN]	3	3	3		√
P19652	Alpha-1-acid glycoprotein 2 OS=Homo sapiens GN=ORM2 PE=1 SV=2 - [A1AG2_HUMAN]	1	1	2		√
P25100	Alpha-1D adrenergic receptor OS=Homo sapiens GN=ADRA1D PE=1 SV=2 - [ADA1D_HUMAN]	5	6	1			√
Q13424	Alpha-1-syntrophin OS=Homo sapiens GN=SNTA1 PE=1 SV=1 - [SNTA1_HUMAN]	4	2	4		√	√
G3XAD9	Alpha-N-acetylgalactosaminide alpha-2,6-sialyltransferase 1 OS=Homo sapiens GN=ST6GALNAC1 PE=1 SV=1 - [G3XAD9_HUMAN]	3	5	3		√
J3KNQ4	Alpha-parvin OS=Homo sapiens GN=PARVA PE=1 SV=1 - [J3KNQ4_HUMAN]	6	5	5		√
Q96QP1	Alpha-protein kinase 1 OS=Homo sapiens GN=ALPK1 PE=2 SV=3 - [ALPK1_HUMAN]	4	5	4		√
Q86TB3	Alpha-protein kinase 2 OS=Homo sapiens GN=ALPK2 PE=2 SV=3 - [ALPK2_HUMAN]	7	9	10	√	√
Q96Q42	Alsin OS=Homo sapiens GN=ALS2 PE=1 SV=2 - [ALS2_HUMAN]	5	4	8		√
L8EAS4	Alternative protein COL23A1 OS=Homo sapiens GN=COL23A1 PE=4 SV=1 - [L8EAS4_HUMAN]	3	2	1		√	√
L0R5A1	Alternative protein CSF2RB OS=Homo sapiens GN=CSF2RB PE=4 SV=1 - [L0R5A1_HUMAN]	1	1	2			√
L8E9Z3	Alternative protein HRC OS=Homo sapiens GN=HRC PE=4 SV=1 - [L8E9Z3_HUMAN]	4	3	5		√
L8E7E2	Alternative protein NBPF9 OS=Homo sapiens GN=NBPF9 PE=4 SV=1 - [L8E7E2_HUMAN]	1	1	3		√
L8E8I6	Alternative protein PURG OS=Homo sapiens GN=PURG PE=4 SV=1 - [L8E8I6_HUMAN]	4	6	2	√
L0R5G8	Alternative protein WDR45 OS=Homo sapiens GN=WDR45 PE=4 SV=1 - [L0R5G8_HUMAN]	2	2	1		√
P15144	Aminopeptidase N OS=Homo sapiens GN=ANPEP PE=1 SV=4 - [AMPN_HUMAN]	5	5	7		√	√
Q8IY63	Angiomotin-like protein 1 OS=Homo sapiens GN=AMOTL1 PE=1 SV=1 - [AMOL1_HUMAN]	5	7	4		√
Q9P0K7	Ankycorbin OS=Homo sapiens GN=RAI14 PE=1 SV=2 - [RAI14_HUMAN]	16	11	12		√
Q8N961	Ankyrin repeat and BTB/POZ domain-containing protein 2 OS=Homo sapiens GN=ABTB2 PE=2 SV=2 - [ABTB2_HUMAN]	3	3	1		√
Q9P2S6	Ankyrin repeat and MYND domain-containing protein 1 OS=Homo sapiens GN=ANKMY1 PE=2 SV=2 - [ANKY1_HUMAN]	2	2	3		√
Q92625	Ankyrin repeat and SAM domain-containing protein 1A OS=Homo sapiens GN=ANKS1A PE=1 SV=4 - [ANS1A_HUMAN]	2	7	5		√
Q8N8V4	Ankyrin repeat and SAM domain-containing protein 4B OS=Homo sapiens GN=ANKS4B PE=1 SV=2 - [ANS4B_HUMAN]	3	3	2		√
Q8IVF6	Ankyrin repeat domain-containing protein 18A OS=Homo sapiens GN=ANKRD18A PE=2 SV=3 - [AN18A_HUMAN]	8	7	5		√
P16157	Ankyrin-1 OS=Homo sapiens GN=ANK1 PE=1 SV=3 - [ANK1_HUMAN]	4	12	6		√
P08758	Annexin A5 OS=Homo sapiens GN=ANXA5 PE=1 SV=2 - [ANXA5_HUMAN]	6	7	6		√
D6RA82	Annexin OS=Homo sapiens GN=ANXA3 PE=1 SV=1 - [D6RA82_HUMAN]	8	5	3		√	√
Q2VPB7	AP-5 complex subunit beta-1 OS=Homo sapiens GN=AP5B1 PE=1 SV=4 - [AP5B1_HUMAN]	3	3	3	√	√	√
O95831	Apoptosis-inducing factor 1, mitochondrial OS=Homo sapiens GN=AIFM1 PE=1 SV=1 - [AIFM1_HUMAN]	3	6	8	√	√
Q9BRQ8	Apoptosis-inducing factor 2 OS=Homo sapiens GN=AIFM2 PE=1 SV=1 - [AIFM2_HUMAN]	2	2	2	√	√
O75342	Arachidonate 12-lipoxygenase, 12R-type OS=Homo sapiens GN=ALOX12B PE=1 SV=1 - [LX12B_HUMAN]	2	2	2		√
F8VVT9	Arf-GAP with GTPase, ANK repeat and PH domain-containing protein 2 OS=Homo sapiens GN=AGAP2 PE=1 SV=1 - [F8VVT9_HUMAN]	9	9	8	√	√
C9JJX6	Armadillo repeat protein deleted in velo-cardio-facial syndrome OS=Homo sapiens GN=ARVCF PE=1 SV=1 - [C9JJX6_HUMAN]	8	6	4	√		√
F8W8Y7	Armadillo repeat-containing X-linked protein 4 OS=Homo sapiens GN=ARMCX4 PE=1 SV=3 - [F8W8Y7_HUMAN]	6	12	14	√	√
O43776	Asparagine--tRNA ligase, cytoplasmic OS=Homo sapiens GN=NARS PE=1 SV=1 - [SYNC_HUMAN]	9	7	9		√
P14868	Aspartate--tRNA ligase, cytoplasmic OS=Homo sapiens GN=DARS PE=1 SV=2 - [SYDC_HUMAN]	9	6	9		√
O15265	Ataxin-7 OS=Homo sapiens GN=ATXN7 PE=1 SV=1 - [ATX7_HUMAN]	5	4	4	√
Q9ULK2	Ataxin-7-like protein 1 OS=Homo sapiens GN=ATXN7L1 PE=1 SV=3 - [AT7L1_HUMAN]	7	3	3	√
Q0QEN7	ATP synthase subunit beta (Fragment) OS=Homo sapiens GN=ATP5B PE=2 SV=1 - [Q0QEN7_HUMAN]	13	13	12		√
Q6PL18	ATPase family AAA domain-containing protein 2 OS=Homo sapiens GN=ATAD2 PE=1 SV=1 - [ATAD2_HUMAN]	11	10	8	√
Q8WWZ4	ATP-binding cassette sub-family A member 10 OS=Homo sapiens GN=ABCA10 PE=2 SV=3 - [ABCAA_HUMAN]	3	4	4			√
Q8IZY2	ATP-binding cassette sub-family A member 7 OS=Homo sapiens GN=ABCA7 PE=1 SV=3 - [ABCA7_HUMAN]	7	5	5		√	√
H0Y4U7	ATP-binding cassette sub-family A member 9 OS=Homo sapiens GN=ABCA9 PE=1 SV=2 - [H0Y4U7_HUMAN]	2	3	5		√	√
Q09428	ATP-binding cassette sub-family C member 8 OS=Homo sapiens GN=ABCC8 PE=1 SV=6 - [ABCC8_HUMAN]	5	6	2	√	√	√
F5GXL6	ATP-dependent DNA helicase DDX11 (Fragment) OS=Homo sapiens GN=DDX11 PE=4 SV=8 - [F5GXL6_HUMAN]	2	3	2	√
O94761	ATP-dependent DNA helicase Q4 OS=Homo sapiens GN=RECQL4 PE=1 SV=1 - [RECQ4_HUMAN]	5	4	4	√	√
Q9NVP1	ATP-dependent RNA helicase DDX18 OS=Homo sapiens GN=DDX18 PE=1 SV=2 - [DDX18_HUMAN]	5	6	6	√
E9PR46	ATP-dependent RNA helicase DDX25 (Fragment) OS=Homo sapiens GN=DDX25 PE=1 SV=2 - [E9PR46_HUMAN]	2	4	4	√
Q8N8A6	ATP-dependent RNA helicase DDX51 OS=Homo sapiens GN=DDX51 PE=1 SV=3 - [DDX51_HUMAN]	3	5	5	√
Q9H2U1	ATP-dependent RNA helicase DHX36 OS=Homo sapiens GN=DHX36 PE=1 SV=2 - [DHX36_HUMAN]	7	7	5	√
Q14865	AT-rich interactive domain-containing protein 5B OS=Homo sapiens GN=ARID5B PE=1 SV=3 - [ARI5B_HUMAN]	8	4	8	√
O75882	Attractin OS=Homo sapiens GN=ATRN PE=1 SV=2 - [ATRN_HUMAN]	5	4	3		√	√
Q96C81	ATXN1 protein (Fragment) OS=Homo sapiens GN=ATXN1 PE=2 SV=1 - [Q96C81_HUMAN]	1	2	2		√
Q8WXX7	Autism susceptibility gene 2 protein OS=Homo sapiens GN=AUTS2 PE=1 SV=1 - [AUTS2_HUMAN]	7	9	4	√
Q96BY7	Autophagy-related protein 2 homolog B OS=Homo sapiens GN=ATG2B PE=1 SV=5 - [ATG2B_HUMAN]	5	6	4	√
O75531	Barrier-to-autointegration factor OS=Homo sapiens GN=BANF1 PE=1 SV=1 - [BAF_HUMAN]	1	2	2	√	√
Q8ND07	Basal body-orientation factor 1 OS=Homo sapiens GN=BBOF1 PE=2 SV=3 - [BBOF1_HUMAN]	6	4	3	√
Q7RTU7	Basic helix-loop-helix transcription factor scleraxis OS=Homo sapiens GN=SCX PE=3 SV=1 - [SCX_HUMAN]	3	6	2	√
Q8NDB2	B-cell scaffold protein with ankyrin repeats OS=Homo sapiens GN=BANK1 PE=1 SV=3 - [BANK1_HUMAN]	4	6	5		√
Q5H9F3	BCL-6 corepressor-like protein 1 OS=Homo sapiens GN=BCORL1 PE=1 SV=1 - [BCORL_HUMAN]	8	6	7	√
Q8N7W2	BEN domain-containing protein 7 OS=Homo sapiens GN=BEND7 PE=1 SV=2 - [BEND7_HUMAN]	2	4	3	√
O15155	BET1 homolog OS=Homo sapiens GN=BET1 PE=1 SV=1 - [BET1_HUMAN]	1	1	1		√
Q13884	Beta-1-syntrophin OS=Homo sapiens GN=SNTB1 PE=1 SV=3 - [SNTB1_HUMAN]	3	5	7		√	√
Q13425	Beta-2-syntrophin OS=Homo sapiens GN=SNTB2 PE=1 SV=1 - [SNTB2_HUMAN]	9	7	7		√	√
O60477	BMP/retinoic acid-inducible neural-specific protein 1 OS=Homo sapiens GN=BRINP1 PE=1 SV=2 - [BRNP1_HUMAN]	3	2	4		√
Q9UQB8	Brain-specific angiogenesis inhibitor 1-associated protein 2 OS=Homo sapiens GN=BAIAP2 PE=1 SV=1 - [BAIP2_HUMAN]	8	8	3		√	√
P51587	Breast cancer type 2 susceptibility protein OS=Homo sapiens GN=BRCA2 PE=1 SV=3 - [BRCA2_HUMAN]	19	16	8	√	√
Q9BWV1	Brother of CDO OS=Homo sapiens GN=BOC PE=1 SV=1 - [BOC_HUMAN]	4	2	2	√		√
Q9P203	BTB/POZ domain-containing protein 7 OS=Homo sapiens GN=BTBD7 PE=1 SV=3 - [BTBD7_HUMAN]	4	5	5	√
Q7KYR7	Butyrophilin subfamily 2 member A1 OS=Homo sapiens GN=BTN2A1 PE=1 SV=3 - [BT2A1_HUMAN]	2	2	2		√	√
Q8IZJ3	C3 and PZP-like alpha-2-macroglobulin domain-containing protein 8 OS=Homo sapiens GN=CPAMD8 PE=1 SV=2 - [CPMD8_HUMAN]	7	5	1			√
F5H5X9	Cadherin-7 OS=Homo sapiens GN=CDH7 PE=1 SV=1 - [F5H5X9_HUMAN]	2	2	1		√	√
J3QQY2	Calcium load-activated calcium channel OS=Homo sapiens GN=TMCO1 PE=1 SV=1 - [J3QQY2_HUMAN]	2	2	3		√
Q14CN2	Calcium-activated chloride channel regulator 4 OS=Homo sapiens GN=CLCA4 PE=1 SV=2 - [CLCA4_HUMAN]	1	2	3	√		√
Q9NZU7	Calcium-binding protein 1 OS=Homo sapiens GN=CABP1 PE=1 SV=5 - [CABP1_HUMAN]	3	3	3		√
F1T0E5	Calcium-dependent secretion activator 1 OS=Homo sapiens GN=CADPS PE=1 SV=1 - [F1T0E5_HUMAN]	6	6	3		√	√
Q9Y2V2	Calcium-regulated heat-stable protein 1 OS=Homo sapiens GN=CARHSP1 PE=1 SV=2 - [CHSP1_HUMAN]	1	1	1		√
Q05682	Caldesmon OS=Homo sapiens GN=CALD1 PE=1 SV=3 - [CALD1_HUMAN]	13	11	10		√
Q9Y6Y1	Calmodulin-binding transcription activator 1 OS=Homo sapiens GN=CAMTA1 PE=1 SV=4 - [CMTA1_HUMAN]	7	4	3	√
P27482	Calmodulin-like protein 3 OS=Homo sapiens GN=CALML3 PE=1 SV=2 - [CALL3_HUMAN]	3	2	2		√
Q08AD1	Calmodulin-regulated spectrin-associated protein 2 OS=Homo sapiens GN=CAMSAP2 PE=1 SV=3 - [CAMP2_HUMAN]	10	10	10		√
Q92887	Canalicular multispecific organic anion transporter 1 OS=Homo sapiens GN=ABCC2 PE=1 SV=3 - [MRP2_HUMAN]	3	3	2	√		√
Q9NS84	Carbohydrate sulfotransferase 7 OS=Homo sapiens GN=CHST7 PE=1 SV=2 - [CHST7_HUMAN]	3	2	2		√
Q8N3K9	Cardiomyopathy-associated protein 5 OS=Homo sapiens GN=CMYA5 PE=1 SV=3 - [CMYA5_HUMAN]	16	18	9		√
Q9BXL7	Caspase recruitment domain-containing protein 11 OS=Homo sapiens GN=CARD11 PE=1 SV=3 - [CAR11_HUMAN]	4	3	4		√	√
Q9BXL6	Caspase recruitment domain-containing protein 14 OS=Homo sapiens GN=CARD14 PE=1 SV=2 - [CAR14_HUMAN]	4	3	4		√	√
P26232	Catenin alpha-2 OS=Homo sapiens GN=CTNNA2 PE=1 SV=5 - [CTNA2_HUMAN]	11	6	4		√
Q9UKZ1	CCR4-NOT transcription complex subunit 11 OS=Homo sapiens GN=CNOT11 PE=1 SV=1 - [CNO11_HUMAN]	2	3	4	√	√
F8VV52	CCR4-NOT transcription complex subunit 2 (Fragment) OS=Homo sapiens GN=CNOT2 PE=1 SV=1 - [F8VV52_HUMAN]	4	2	5	√	√
B9EG74	CDK5 regulatory subunit associated protein 2 OS=Homo sapiens GN=CDK5RAP2 PE=2 SV=1 - [B9EG74_HUMAN]	13	11	8		√
Q8WUJ3	Cell migration-inducing and hyaluronan-binding protein OS=Homo sapiens GN=CEMIP PE=1 SV=2 - [CEMIP_HUMAN]	5	4	2	√	√	√
O60308	Centrosomal protein of 104 kDa OS=Homo sapiens GN=CEP104 PE=1 SV=1 - [CE104_HUMAN]	8	4	6		√
Q6ZU80	Centrosomal protein of 128 kDa OS=Homo sapiens GN=CEP128 PE=1 SV=2 - [CE128_HUMAN]	4	8	8		√
Q9UPV0	Centrosomal protein of 164 kDa OS=Homo sapiens GN=CEP164 PE=1 SV=3 - [CE164_HUMAN]	8	6	7		√
Q9C0D2	Centrosomal protein of 295 kDa OS=Homo sapiens GN=CEP295 PE=1 SV=4 - [CE295_HUMAN]	5	7	4		√
Q49MI3	Ceramide kinase-like protein OS=Homo sapiens GN=CERKL PE=1 SV=1 - [CERKL_HUMAN]	6	3	3	√	√
Q9NUG4	Cerebral cavernous malformations 2 protein-like OS=Homo sapiens GN=CCM2L PE=2 SV=3 - [CCM2L_HUMAN]	8	4	5	√	√
Q6I9Z0	CERK protein OS=Homo sapiens GN=CERK PE=2 SV=1 - [Q6I9Z0_HUMAN]	1	1	2		√	√
B9EGV9	Ceroid-lipofuscinosis, neuronal 8 (Epilepsy, progressive with mental retardation) OS=Homo sapiens GN=CLN8 PE=2 SV=1 - [B9EGV9_HUMAN]	3	3	1		√
P28329	Choline O-acetyltransferase OS=Homo sapiens GN=CHAT PE=1 SV=4 - [CLAT_HUMAN]	4	3	4	√	√
D6W625	Chromatin assembly factor 1, subunit A (P150), isoform CRA_a OS=Homo sapiens GN=CHAF1A PE=4 SV=1 - [D6W625_HUMAN]	3	3	4	√
Q14781	Chromobox protein homolog 2 OS=Homo sapiens GN=CBX2 PE=1 SV=2 - [CBX2_HUMAN]	3	6	4	√
Q9Y232	Chromodomain Y-like protein OS=Homo sapiens GN=CDYL PE=1 SV=2 - [CDYL1_HUMAN]	4	5	7	√
Q8TDI0	Chromodomain-helicase-DNA-binding protein 5 OS=Homo sapiens GN=CHD5 PE=1 SV=1 - [CHD5_HUMAN]	14	10	18	√
E9PRZ9	Chromosome 11 open reading frame 58 (Fragment) OS=Homo sapiens GN=C11orf58 PE=1 SV=1 - [E9PRZ9_HUMAN]	1	3	1		√
D3DRP5	Chromosome 9 open reading frame 19, isoform CRA_a (Fragment) OS=Homo sapiens GN=C9orf19 PE=4 SV=1 - [D3DRP5_HUMAN]	7	2	7		√
Q5T655	Cilia- and flagella-associated protein 58 OS=Homo sapiens GN=CFAP58 PE=1 SV=1 - [CFA58_HUMAN]	8	8	10	√
Q5T0N1	Cilia- and flagella-associated protein 70 OS=Homo sapiens GN=CFAP70 PE=2 SV=3 - [CFA70_HUMAN]	5	4	2	√
G5E9Z2	Cisplatin resistance related protein CRR9p, isoform CRA_c OS=Homo sapiens GN=CLPTM1L PE=1 SV=1 - [G5E9Z2_HUMAN]	2	2	2		√	√
O14578	Citron Rho-interacting kinase OS=Homo sapiens GN=CIT PE=1 SV=2 - [CTRO_HUMAN]	13	11	16		√
E9PAX0	CKLF-like MARVEL transmembrane domain-containing protein 1 OS=Homo sapiens GN=CMTM1 PE=1 SV=1 - [E9PAX0_HUMAN]	5	3	4	√		√
O14503	Class E basic helix-loop-helix protein 40 OS=Homo sapiens GN=BHLHE40 PE=1 SV=1 - [BHE40_HUMAN]	3	2	4	√
Q12996	Cleavage stimulation factor subunit 3 OS=Homo sapiens GN=CSTF3 PE=1 SV=1 - [CSTF3_HUMAN]	7	9	5	√
Q6P1N0	Coiled-coil and C2 domain-containing protein 1A OS=Homo sapiens GN=CC2D1A PE=1 SV=1 - [C2D1A_HUMAN]	7	7	8	√	√
H7C1U3	Coiled-coil and C2 domain-containing protein 1B (Fragment) OS=Homo sapiens GN=CC2D1B PE=1 SV=2 - [H7C1U3_HUMAN]	4	7	10	√	√
Q9P2K1	Coiled-coil and C2 domain-containing protein 2A OS=Homo sapiens GN=CC2D2A PE=1 SV=3 - [C2D2A_HUMAN]	4	3	4	√	√
Q96A19	Coiled-coil domain-containing protein 102A OS=Homo sapiens GN=CCDC102A PE=1 SV=2 - [C102A_HUMAN]	3	3	6	√
Q8IYX3	Coiled-coil domain-containing protein 116 OS=Homo sapiens GN=CCDC116 PE=1 SV=2 - [CC116_HUMAN]	3	2	3	√
Q8IYE1	Coiled-coil domain-containing protein 13 OS=Homo sapiens GN=CCDC13 PE=1 SV=2 - [CCD13_HUMAN]	4	4	4	√
Q6ZUS6	Coiled-coil domain-containing protein 149 OS=Homo sapiens GN=CCDC149 PE=2 SV=2 - [CC149_HUMAN]	5	5	5	√
Q569K6	Coiled-coil domain-containing protein 157 OS=Homo sapiens GN=CCDC157 PE=2 SV=3 - [CC157_HUMAN]	4	4	5	√
Q8N715	Coiled-coil domain-containing protein 185 OS=Homo sapiens GN=CCDC185 PE=1 SV=2 - [CC185_HUMAN]	5	7	2	√
Q502W7	Coiled-coil domain-containing protein 38 OS=Homo sapiens GN=CCDC38 PE=2 SV=1 - [CCD38_HUMAN]	4	5	4	√
Q2TAC2	Coiled-coil domain-containing protein 57 OS=Homo sapiens GN=CCDC57 PE=1 SV=2 - [CCD57_HUMAN]	10	6	7	√
H7BY33	Coiled-coil domain-containing protein 88B OS=Homo sapiens GN=CCDC88B PE=1 SV=1 - [H7BY33_HUMAN]	2	6	4	√
P38432	Coilin OS=Homo sapiens GN=COIL PE=1 SV=1 - [COIL_HUMAN]	5	3	7	√
P42695	Condensin-2 complex subunit D3 OS=Homo sapiens GN=NCAPD3 PE=1 SV=2 - [CNDD3_HUMAN]	8	4	9	√
Q9UP83	Conserved oligomeric Golgi complex subunit 5 OS=Homo sapiens GN=COG5 PE=1 SV=3 - [COG5_HUMAN]	5	5	6		√
Q9P232	Contactin-3 OS=Homo sapiens GN=CNTN3 PE=1 SV=3 - [CNTN3_HUMAN]	4	5	3			√
O75367	Core histone macro-H2A.1 OS=Homo sapiens GN=H2AFY PE=1 SV=4 - [H2AY_HUMAN]	5	3	3	√
B4E3S0	Coronin OS=Homo sapiens GN=CORO1C PE=1 SV=1 - [B4E3S0_HUMAN]	7	6	7		√
P24468	COUP transcription factor 2 OS=Homo sapiens GN=NR2F2 PE=1 SV=1 - [COT2_HUMAN]	4	3	3	√
Q9Y4F4	Crescerin-1 OS=Homo sapiens GN=FAM179B PE=1 SV=4 - [CREC1_HUMAN]	12	8	10		√
Q96FS1	CTNND1 protein (Fragment) OS=Homo sapiens GN=CTNND1 PE=2 SV=2 - [Q96FS1_HUMAN]	11	13	9	√	√	√
Q9UBG0	C-type mannose receptor 2 OS=Homo sapiens GN=MRC2 PE=1 SV=2 - [MRC2_HUMAN]	6	3	2		√	√
Q13619	Cullin-4A OS=Homo sapiens GN=CUL4A PE=1 SV=3 - [CUL4A_HUMAN]	7	9	7	√
O75155	Cullin-associated NEDD8-dissociated protein 2 OS=Homo sapiens GN=CAND2 PE=1 SV=3 - [CAND2_HUMAN]	5	6	6	√
B9A057	Cytochrome c oxidase assembly factor 5 OS=Homo sapiens GN=COA5 PE=1 SV=1 - [B9A057_HUMAN]	2	3	2		√
F8W816	Cytochrome P450 2A7 OS=Homo sapiens GN=CYP2A7 PE=1 SV=1 - [F8W816_HUMAN]	2	4	2		√
O00154	Cytosolic acyl coenzyme A thioester hydrolase OS=Homo sapiens GN=ACOT7 PE=1 SV=3 - [BACH_HUMAN]	4	3	4		√
Q5U5Z8	Cytosolic carboxypeptidase 2 OS=Homo sapiens GN=AGBL2 PE=1 SV=2 - [CBPC2_HUMAN]	4	4	2		√
Q86XP0	Cytosolic phospholipase A2 delta OS=Homo sapiens GN=PLA2G4D PE=1 SV=2 - [PA24D_HUMAN]	1	2	3		√
Q5M775	Cytospin-B OS=Homo sapiens GN=SPECC1 PE=1 SV=1 - [CYTSB_HUMAN]	14	9	13	√
Q9NYF0	Dapper homolog 1 OS=Homo sapiens GN=DACT1 PE=1 SV=2 - [DACT1_HUMAN]	3	10	7	√	√
N0DVX5	DBF4-type zinc finger-containing protein 2 OS=Homo sapiens GN=ZDBF2 PE=1 SV=1 - [N0DVX5_HUMAN]	6	7	4	√
Q5BKZ1	DBIRD complex subunit ZNF326 OS=Homo sapiens GN=ZNF326 PE=1 SV=2 - [ZN326_HUMAN]	4	3	5	√
Q66K64	DDB1- and CUL4-associated factor 15 OS=Homo sapiens GN=DCAF15 PE=1 SV=1 - [DCA15_HUMAN]	5	3	5	√
Q92608	Dedicator of cytokinesis protein 2 OS=Homo sapiens GN=DOCK2 PE=1 SV=2 - [DOCK2_HUMAN]	4	3	7	√	√	√
Q96HP0	Dedicator of cytokinesis protein 6 OS=Homo sapiens GN=DOCK6 PE=1 SV=3 - [DOCK6_HUMAN]	8	7	6		√
Q68D51	DENN domain-containing protein 2C OS=Homo sapiens GN=DENND2C PE=1 SV=2 - [DEN2C_HUMAN]	3	3	6		√
Q6ZUT9	DENN domain-containing protein 5B OS=Homo sapiens GN=DENND5B PE=1 SV=2 - [DEN5B_HUMAN]	3	3	10		√	√
Q9Y3Z3	Deoxynucleoside triphosphate triphosphohydrolase SAMHD1 OS=Homo sapiens GN=SAMHD1 PE=1 SV=2 - [SAMH1_HUMAN]	6	5	6	√
O75140	DEP domain-containing protein 5 OS=Homo sapiens GN=DEPDC5 PE=1 SV=2 - [DEPD5_HUMAN]	5	4	9		√
Q13574	Diacylglycerol kinase zeta OS=Homo sapiens GN=DGKZ PE=1 SV=3 - [DGKZ_HUMAN]	7	7	3	√	√	√
P36957	Dihydrolipoyllysine-residue succinyltransferase component of 2-oxoglutarate dehydrogenase complex, mitochondrial OS=Homo sapiens GN=DLST PE=1 SV=4 - [ODO2_HUMAN]	6	2	4		√
P42658	Dipeptidyl aminopeptidase-like protein 6 OS=Homo sapiens GN=DPP6 PE=1 SV=2 - [DPP6_HUMAN]	5	8	6			√
Q8TF46	DIS3-like exonuclease 1 OS=Homo sapiens GN=DIS3L PE=1 SV=2 - [DI3L1_HUMAN]	6	4	3		√
Q5VWQ8	Disabled homolog 2-interacting protein OS=Homo sapiens GN=DAB2IP PE=1 SV=2 - [DAB2P_HUMAN]	8	8	7		√
O95886	Disks large-associated protein 3 OS=Homo sapiens GN=DLGAP3 PE=1 SV=3 - [DLGP3_HUMAN]	4	6	5	√	√	√
Q9Y2H0	Disks large-associated protein 4 OS=Homo sapiens GN=DLGAP4 PE=1 SV=3 - [DLGP4_HUMAN]	6	4	5	√		√
Q8TDJ6	DmX-like protein 2 OS=Homo sapiens GN=DMXL2 PE=1 SV=2 - [DMXL2_HUMAN]	9	11	10		√
Q5T890	DNA excision repair protein ERCC-6-like 2 OS=Homo sapiens GN=ERCC6L2 PE=1 SV=2 - [ER6L2_HUMAN]	6	9	6	√
Q8NG08	DNA helicase B OS=Homo sapiens GN=HELB PE=1 SV=2 - [HELB_HUMAN]	2	2	3	√
Q9ULG1	DNA helicase INO80 OS=Homo sapiens GN=INO80 PE=1 SV=2 - [INO80_HUMAN]	5	4	6	√
Q92878	DNA repair protein RAD50 OS=Homo sapiens GN=RAD50 PE=1 SV=1 - [RAD50_HUMAN]	13	10	10	√
Q92547	DNA topoisomerase 2-binding protein 1 OS=Homo sapiens GN=TOPBP1 PE=1 SV=3 - [TOPB1_HUMAN]	6	5	6	√	√
H0YLX2	DNA-binding protein RFX7 OS=Homo sapiens GN=RFX7 PE=1 SV=2 - [H0YLX2_HUMAN]	4	7	8	√
Q9H9Y6	DNA-directed RNA polymerase I subunit RPA2 OS=Homo sapiens GN=POLR1B PE=1 SV=2 - [RPA2_HUMAN]	9	8	6	√
O00411	DNA-directed RNA polymerase, mitochondrial OS=Homo sapiens GN=POLRMT PE=1 SV=2 - [RPOM_HUMAN]	5	5	6		√
Q9NVM6	DnaJ homolog subfamily C member 17 OS=Homo sapiens GN=DNAJC17 PE=1 SV=1 - [DJC17_HUMAN]	2	3	3	√
Q+A261:B2639H3Z4	DnaJ homolog subfamily C member 5 OS=Homo sapiens GN=DNAJC5 PE=1 SV=1 - [DNJC5_HUMAN]	2	2	3		√
Q9P0K9	DOMON domain-containing protein FRRS1L OS=Homo sapiens GN=FRRS1L PE=1 SV=2 - [FRS1L_HUMAN]	4	7	2			√
P09172	Dopamine beta-hydroxylase OS=Homo sapiens GN=DBH PE=1 SV=3 - [DOPO_HUMAN]	2	3	3		√
H0UI11	Dopey family member 1, isoform CRA_a OS=Homo sapiens GN=DOPEY1 PE=4 SV=1 - [H0UI11_HUMAN]	5	3	3		√
Q16643	Drebrin OS=Homo sapiens GN=DBN1 PE=1 SV=4 - [DREB_HUMAN]	7	5	7		√
Q9UNI6	Dual specificity protein phosphatase 12 OS=Homo sapiens GN=DUSP12 PE=1 SV=1 - [DUS12_HUMAN]	2	3	3	√
G8JLD5	Dynamin-1-like protein OS=Homo sapiens GN=DNM1L PE=1 SV=1 - [G8JLD5_HUMAN]	8	7	5		√
Q9UQ16	Dynamin-3 OS=Homo sapiens GN=DNM3 PE=1 SV=4 - [DYN3_HUMAN]	9	9	9		√
Q6XZF7	Dynamin-binding protein OS=Homo sapiens GN=DNMBP PE=1 SV=1 - [DNMBP_HUMAN]	7	5	3		√
Q9C0G6	Dynein heavy chain 6, axonemal OS=Homo sapiens GN=DNAH6 PE=2 SV=3 - [DYH6_HUMAN]	13	15	9		√
Q5VTU3	Dynein light chain Tctex-type 1 OS=Homo sapiens GN=DYNLT1 PE=1 SV=1 - [Q5VTU3_HUMAN]	1	1	1		√
O75923	Dysferlin OS=Homo sapiens GN=DYSF PE=1 SV=1 - [DYSF_HUMAN]	5	3	8		√	√
G5E9A7	Dystrophia myotonica WD repeat-containing protein OS=Homo sapiens GN=DMWD PE=1 SV=1 - [G5E9A7_HUMAN]	2	5	6	√
Q96L91	E1A-binding protein p400 OS=Homo sapiens GN=EP400 PE=1 SV=4 - [EP400_HUMAN]	4	10	10	√
Q9Y2E6	E3 ubiquitin-protein ligase DTX4 OS=Homo sapiens GN=DTX4 PE=1 SV=2 - [DTX4_HUMAN]	6	3	3		√
Q86Y13	E3 ubiquitin-protein ligase DZIP3 OS=Homo sapiens GN=DZIP3 PE=1 SV=2 - [DZIP3_HUMAN]	4	2	5		√
O94822	E3 ubiquitin-protein ligase listerin OS=Homo sapiens GN=LTN1 PE=1 SV=6 - [LTN1_HUMAN]	3	6	6	√	√
Q8IYW5	E3 ubiquitin-protein ligase RNF168 OS=Homo sapiens GN=RNF168 PE=1 SV=1 - [RN168_HUMAN]	5	4	4	√
Q149N8	E3 ubiquitin-protein ligase SHPRH OS=Homo sapiens GN=SHPRH PE=1 SV=2 - [SHPRH_HUMAN]	11	4	6	√
Q14669	E3 ubiquitin-protein ligase TRIP12 OS=Homo sapiens GN=TRIP12 PE=1 SV=1 - [TRIPC_HUMAN]	10	17	11	√	√
Q8IWV8	E3 ubiquitin-protein ligase UBR2 OS=Homo sapiens GN=UBR2 PE=1 SV=1 - [UBR2_HUMAN]	8	5	5	√
H0Y3M3	Echinoderm microtubule-associated protein-like 3 (Fragment) OS=Homo sapiens GN=EML3 PE=1 SV=2 - [H0Y3M3_HUMAN]	5	6	7		√
O60447	Ecotropic viral integration site 5 protein homolog OS=Homo sapiens GN=EVI5 PE=1 SV=3 - [EVI5_HUMAN]	10	4	5	√
Q9HCE0	Ectopic P granules protein 5 homolog OS=Homo sapiens GN=EPG5 PE=1 SV=2 - [EPG5_HUMAN]	2	5	6	√
Q15717	ELAV-like protein 1 OS=Homo sapiens GN=ELAVL1 PE=1 SV=2 - [ELAV1_HUMAN]	2	4	4		√
P13804	Electron transfer flavoprotein subunit alpha, mitochondrial OS=Homo sapiens GN=ETFA PE=1 SV=1 - [ETFA_HUMAN]	7	6	5		√
Q2Y0W8	Electroneutral sodium bicarbonate exchanger 1 OS=Homo sapiens GN=SLC4A8 PE=1 SV=1 - [S4A8_HUMAN]	5	3	2	√	√	√
F8WEC1	ELMO domain-containing protein 3 OS=Homo sapiens GN=ELMOD3 PE=1 SV=1 - [F8WEC1_HUMAN]	3	3	1	√
P49411	Elongation factor Tu, mitochondrial OS=Homo sapiens GN=TUFM PE=1 SV=2 - [EFTU_HUMAN]	2	4	9		√
Q9H9T3	Elongator complex protein 3 OS=Homo sapiens GN=ELP3 PE=1 SV=2 - [ELP3_HUMAN]	2	3	3	√	√
E5RHG8	Elongin-C (Fragment) OS=Homo sapiens GN=ELOC PE=1 SV=1 - [E5RHG8_HUMAN]	1	2	1	√
P29322	Ephrin type-A receptor 8 OS=Homo sapiens GN=EPHA8 PE=1 SV=2 - [EPHA8_HUMAN]	3	4	4		√	√
P54762	Ephrin type-B receptor 1 OS=Homo sapiens GN=EPHB1 PE=1 SV=1 - [EPHB1_HUMAN]	2	4	2		√	√
P16422	Epithelial cell adhesion molecule OS=Homo sapiens GN=EPCAM PE=1 SV=2 - [EPCAM_HUMAN]	4	2	2	√		√
P24390	ER lumen protein-retaining receptor 1 OS=Homo sapiens GN=KDELR1 PE=1 SV=1 - [ERD21_HUMAN]	2	2	1		√
S4R329	ER membrane protein complex subunit 4 OS=Homo sapiens GN=EMC4 PE=1 SV=1 - [S4R329_HUMAN]	4	2	3		√
Q9BV81	ER membrane protein complex subunit 6 OS=Homo sapiens GN=EMC6 PE=1 SV=1 - [EMC6_HUMAN]	1	1	1		√
E5RHW4	Erlin-2 (Fragment) OS=Homo sapiens GN=ERLIN2 PE=1 SV=1 - [E5RHW4_HUMAN]	6	4	8		√
Q96HE7	ERO1-like protein alpha OS=Homo sapiens GN=ERO1A PE=1 SV=2 - [ERO1A_HUMAN]	3	3	3		√
Q3B7T1	Erythroid differentiation-related factor 1 OS=Homo sapiens GN=EDRF1 PE=1 SV=1 - [EDRF1_HUMAN]	5	6	8	√
B7WNQ9	Erythroid transcription factor OS=Homo sapiens GN=GATA1 PE=1 SV=1 - [B7WNQ9_HUMAN]	1	2	2	√
Q9H501	ESF1 homolog OS=Homo sapiens GN=ESF1 PE=1 SV=1 - [ESF1_HUMAN]	6	3	8	√
P41162	ETS translocation variant 3 OS=Homo sapiens GN=ETV3 PE=1 SV=2 - [ETV3_HUMAN]	3	4	2	√
Q6ZNE1	Eukaryotic translation initiation factor 3 subunit A OS=Homo sapiens GN=EIF3A PE=2 SV=1 - [Q6ZNE1_HUMAN]	8	2	4		√
Q8N9H8	Exonuclease mut-7 homolog OS=Homo sapiens GN=EXD3 PE=2 SV=3 - [MUT7_HUMAN]	6	7	7	√
Q01780	Exosome component 10 OS=Homo sapiens GN=EXOSC10 PE=1 SV=2 - [EXOSX_HUMAN]	3	2	3	√	√
Q6NUL1	Exostoses (Multiple) 2 OS=Homo sapiens GN=EXT2 PE=2 SV=1 - [Q6NUL1_HUMAN]	3	4	1		√
O43909	Exostosin-like 3 OS=Homo sapiens GN=EXTL3 PE=1 SV=1 - [EXTL3_HUMAN]	6	2	4		√
Q86XX4	Extracellular matrix protein FRAS1 OS=Homo sapiens GN=FRAS1 PE=1 SV=2 - [FRAS1_HUMAN]	4	4	2	√		√
O14926	Fascin-2 OS=Homo sapiens GN=FSCN2 PE=1 SV=1 - [FSCN2_HUMAN]	1	1	1		√
Q8TF61	F-box only protein 41 OS=Homo sapiens GN=FBXO41 PE=2 SV=5 - [FBX41_HUMAN]	6	3	6	√	√
Q8NEE6	F-box/LRR-repeat protein 13 OS=Homo sapiens GN=FBXL13 PE=2 SV=3 - [FXL13_HUMAN]	4	7	3		√
Q9P2Q2	FERM domain-containing protein 4A OS=Homo sapiens GN=FRMD4A PE=1 SV=3 - [FRM4A_HUMAN]	4	7	7		√
O94887	FERM, RhoGEF and pleckstrin domain-containing protein 2 OS=Homo sapiens GN=FARP2 PE=1 SV=3 - [FARP2_HUMAN]	6	5	4		√
P08F94	Fibrocystin OS=Homo sapiens GN=PKHD1 PE=1 SV=1 - [PKHD1_HUMAN]	6	3	3		√	√
Q86WI1	Fibrocystin-L OS=Homo sapiens GN=PKHD1L1 PE=2 SV=2 - [PKHL1_HUMAN]	7	3	4		√	√
P02751	Fibronectin OS=Homo sapiens GN=FN1 PE=1 SV=4 - [FINC_HUMAN]	27	25	27		√
Q53EP0	Fibronectin type III domain-containing protein 3B OS=Homo sapiens GN=FNDC3B PE=1 SV=2 - [FND3B_HUMAN]	6	4	7		√	√
Q4L180	Filamin A-interacting protein 1-like OS=Homo sapiens GN=FILIP1L PE=1 SV=2 - [FIL1L_HUMAN]	7	8	5	√	√	√
Q6FG43	FLOT2 protein OS=Homo sapiens GN=FLOT2 PE=2 SV=1 - [Q6FG43_HUMAN]	15	17	16		√	√
P55316	Forkhead box protein G1 OS=Homo sapiens GN=FOXG1 PE=1 SV=2 - [FOXG1_HUMAN]	1	5	2	√
D3DSM8	Formiminotransferase cyclodeaminase, isoform CRA_a OS=Homo sapiens GN=FTCD PE=4 SV=1 - [D3DSM8_HUMAN]	4	2	5		√
H0YM30	Formin-1 OS=Homo sapiens GN=FMN1 PE=1 SV=1 - [H0YM30_HUMAN]	7	6	9	√	√
O95466	Formin-like protein 1 OS=Homo sapiens GN=FMNL1 PE=1 SV=3 - [FMNL1_HUMAN]	6	3	4		√	√
P05062	Fructose-bisphosphate aldolase B OS=Homo sapiens GN=ALDOB PE=1 SV=2 - [ALDOB_HUMAN]	3	3	4		√
Q8N612	FTS and Hook-interacting protein OS=Homo sapiens GN=FAM160A2 PE=1 SV=3 - [F16A2_HUMAN]	3	1	5		√
Q6ZV73	FYVE, RhoGEF and PH domain-containing protein 6 OS=Homo sapiens GN=FGD6 PE=1 SV=2 - [FGD6_HUMAN]	9	11	8		√
Q7Z2K8	G protein-regulated inducer of neurite outgrowth 1 OS=Homo sapiens GN=GPRIN1 PE=1 SV=2 - [GRIN1_HUMAN]	15	13	9	√		√
P47929	Galectin-7 OS=Homo sapiens GN=LGALS7 PE=1 SV=2 - [LEG7_HUMAN]	3	3	4	√	√
Q96KN9	Gap junction delta-4 protein OS=Homo sapiens GN=GJD4 PE=2 SV=1 - [CXD4_HUMAN]	3	2	6			√
P49448	Glutamate dehydrogenase 2, mitochondrial OS=Homo sapiens GN=GLUD2 PE=1 SV=2 - [DHE4_HUMAN]	11	13	12		√
O15399	Glutamate receptor ionotropic, NMDA 2D OS=Homo sapiens GN=GRIN2D PE=1 SV=2 - [NMDE4_HUMAN]	5	5	3			√
O76003	Glutaredoxin-3 OS=Homo sapiens GN=GLRX3 PE=1 SV=2 - [GLRX3_HUMAN]	4	3	3		√
P11216	Glycogen phosphorylase, brain form OS=Homo sapiens GN=PYGB PE=1 SV=5 - [PYGB_HUMAN]	7	6	3		√
Q96HI4	Glycylpeptide N-tetradecanoyltransferase (Fragment) OS=Homo sapiens GN=NMT1 PE=2 SV=2 - [Q96HI4_HUMAN]	3	4	4		√
Q05DU1	GNL3L protein (Fragment) OS=Homo sapiens GN=GNL3L PE=2 SV=1 - [Q05DU1_HUMAN]	4	3	4	√
G3V0G1	Golgi reassembly stacking protein 1, 65kDa, isoform CRA_d OS=Homo sapiens GN=GORASP1 PE=1 SV=1 - [G3V0G1_HUMAN]	2	2	2		√
P0CJ92	Golgin subfamily A member 8H OS=Homo sapiens GN=GOLGA8H PE=3 SV=1 - [GOG8H_HUMAN]	5	3	6		√
Q8TEQ8	GPI ethanolamine phosphate transferase 3 OS=Homo sapiens GN=PIGO PE=1 SV=3 - [PIGO_HUMAN]	5	1	3		√
Q8WXG9	G-protein coupled receptor 98 OS=Homo sapiens GN=GPR98 PE=1 SV=2 - [GPR98_HUMAN]	6	6	19			√
Q9UQC2	GRB2-associated-binding protein 2 OS=Homo sapiens GN=GAB2 PE=1 SV=1 - [GAB2_HUMAN]	3	2	7		√	√
O43903	Growth arrest-specific protein 2 OS=Homo sapiens GN=GAS2 PE=1 SV=1 - [GAS2_HUMAN]	4	3	3		√	√
Q8ND71	GTPase IMAP family member 8 OS=Homo sapiens GN=GIMAP8 PE=2 SV=2 - [GIMA8_HUMAN]	3	5	4		√
F8W9S7	GTPase-activating protein and VPS9 domain-containing protein 1 OS=Homo sapiens GN=GAPVD1 PE=1 SV=1 - [F8W9S7_HUMAN]	4	3	6		√	√
H0Y5E8	GTP-binding protein SAR1a (Fragment) OS=Homo sapiens GN=SAR1A PE=1 SV=1 - [H0Y5E8_HUMAN]	4	2	2		√
Q14344	Guanine nucleotide-binding protein subunit alpha-13 OS=Homo sapiens GN=GNA13 PE=1 SV=2 - [GNA13_HUMAN]	6	8	6		√	√
D3DT27	Guanylate binding protein 4, isoform CRA_a OS=Homo sapiens GN=GBP4 PE=4 SV=1 - [D3DT27_HUMAN]	3	2	2		√
Q92574	Hamartin OS=Homo sapiens GN=TSC1 PE=1 SV=2 - [TSC1_HUMAN]	4	3	4	√	√
O94927	HAUS augmin-like complex subunit 5 OS=Homo sapiens GN=HAUS5 PE=1 SV=2 - [HAUS5_HUMAN]	2	3	4		√
Q9BT25	HAUS augmin-like complex subunit 8 OS=Homo sapiens GN=HAUS8 PE=1 SV=3 - [HAUS8_HUMAN]	4	3	4		√
Q8N241	Heat shock 27kDa protein family, member 7 (Cardiovascular), isoform CRA_c OS=Homo sapiens GN=HSPB7 PE=1 SV=1 - [Q8N241_HUMAN]	2	2	3	√	√
Q0VDF9	Heat shock 70 kDa protein 14 OS=Homo sapiens GN=HSPA14 PE=1 SV=1 - [HSP7E_HUMAN]	3	4	2		√
E9PN89	Heat shock cognate 71 kDa protein (Fragment) OS=Homo sapiens GN=HSPA8 PE=1 SV=1 - [E9PN89_HUMAN]	20	20	22		√
Q58FF2	Heat shock protein 94c OS=Homo sapiens GN=GRP94c PE=2 SV=1 - [Q58FF2_HUMAN]	10	7	6		√
P25092	Heat-stable enterotoxin receptor OS=Homo sapiens GN=GUCY2C PE=1 SV=2 - [GUC2C_HUMAN]	6	3	5		√	√
H3BS08	Hematological and neurological-expressed 1-like protein OS=Homo sapiens GN=HN1L PE=1 SV=1 - [H3BS08_HUMAN]	1	1	2	√	√
E7BJU4	Heme oxygenase 1 (Fragment) OS=Homo sapiens GN=HO1 PE=2 SV=1 - [E7BJU4_HUMAN]	1	2	2		√
I3L159	Heme oxygenase 2 (Fragment) OS=Homo sapiens GN=HMOX2 PE=1 SV=1 - [I3L159_HUMAN]	5	5	4		√
F8VXV4	Heme transporter HRG1 OS=Homo sapiens GN=SLC48A1 PE=4 SV=1 - [F8VXV4_HUMAN]	1	1	1		√	√
Q9Y661	Heparan sulfate glucosamine 3-O-sulfotransferase 4 OS=Homo sapiens GN=HS3ST4 PE=2 SV=3 - [HS3S4_HUMAN]	1	2	1		√
I3L4R4	Hepatic leukemia factor (Fragment) OS=Homo sapiens GN=HLF PE=4 SV=1 - [I3L4R4_HUMAN]	2	3	4	√
H3BPM9	Hepatoma-derived growth factor-related protein 3 (Fragment) OS=Homo sapiens GN=HDGFRP3 PE=1 SV=1 - [H3BPM9_HUMAN]	1	1	2	√
P31943	Heterogeneous nuclear ribonucleoprotein H OS=Homo sapiens GN=HNRNPH1 PE=1 SV=4 - [HNRH1_HUMAN]	10	9	10	√
Q5T6U8	High mobility group AT-hook 1 OS=Homo sapiens GN=HMGA1 PE=2 SV=1 - [Q5T6U8_HUMAN]	1	1	1	√
O00479	High mobility group nucleosome-binding domain-containing protein 4 OS=Homo sapiens GN=HMGN4 PE=1 SV=3 - [HMGN4_HUMAN]	1	2	4	√
P19113	Histidine decarboxylase OS=Homo sapiens GN=HDC PE=1 SV=2 - [DCHS_HUMAN]	3	4	5	√
Q92794	Histone acetyltransferase KAT6A OS=Homo sapiens GN=KAT6A PE=1 SV=2 - [KAT6A_HUMAN]	9	4	7	√	√
Q09472	Histone acetyltransferase p300 OS=Homo sapiens GN=EP300 PE=1 SV=2 - [EP300_HUMAN]	12	5	6	√	√
Q8IZA3	Histone H1oo OS=Homo sapiens GN=H1FOO PE=2 SV=1 - [H1FOO_HUMAN]	3	4	3	√	√
Q03164	Histone-lysine N-methyltransferase 2A OS=Homo sapiens GN=KMT2A PE=1 SV=5 - [KMT2A_HUMAN]	21	17	17	√
H0Y765	Histone-lysine N-methyltransferase 2C (Fragment) OS=Homo sapiens GN=KMT2C PE=1 SV=1 - [H0Y765_HUMAN]	4	6	5	√
Q8NEZ4	Histone-lysine N-methyltransferase 2C OS=Homo sapiens GN=KMT2C PE=1 SV=3 - [KMT2C_HUMAN]	10	13	10	√
Q4FZB7	Histone-lysine N-methyltransferase KMT5B OS=Homo sapiens GN=KMT5B PE=1 SV=4 - [KMT5B_HUMAN]	2	5	5	√
O15047	Histone-lysine N-methyltransferase SETD1A OS=Homo sapiens GN=SETD1A PE=1 SV=3 - [SET1A_HUMAN]	4	5	5	√
Q9BYW2	Histone-lysine N-methyltransferase SETD2 OS=Homo sapiens GN=SETD2 PE=1 SV=3 - [SETD2_HUMAN]	12	10	14	√
Q0VGD6	HNRPR protein (Fragment) OS=Homo sapiens GN=HNRPR PE=2 SV=1 - [Q0VGD6_HUMAN]	9	10	10	√	√
P39880	Homeobox protein cut-like 1 OS=Homo sapiens GN=CUX1 PE=1 SV=3 - [CUX1_HUMAN]	8	7	10		√
Q4G0P3	Hydrocephalus-inducing protein homolog OS=Homo sapiens GN=HYDIN PE=1 SV=3 - [HYDIN_HUMAN]	14	8	12		√
H3BN70	Hydroxyacylglutathione hydrolase-like protein OS=Homo sapiens GN=HAGHL PE=1 SV=1 - [H3BN70_HUMAN]	4	4	2		√
R4RYY7	Hypoxia-inducible factor prolyl hydroxylase 2 OS=Homo sapiens GN=EGLN1 PE=4 SV=1 - [R4RYY7_HUMAN]	4	2	5	√	√
H0YBM2	Immunity-related GTPase family M protein (Fragment) OS=Homo sapiens GN=IRGM PE=4 SV=1 - [H0YBM2_HUMAN]	2	2	3		√	√
O15397	Importin-8 OS=Homo sapiens GN=IPO8 PE=1 SV=2 - [IPO8_HUMAN]	4	5	3	√	√
Q70EL1	Inactive ubiquitin carboxyl-terminal hydrolase 54 OS=Homo sapiens GN=USP54 PE=1 SV=4 - [UBP54_HUMAN]	5	7	3	√	√
O14920	Inhibitor of nuclear factor kappa-B kinase subunit beta OS=Homo sapiens GN=IKBKB PE=1 SV=1 - [IKKB_HUMAN]	5	6	6	√	√	√
Q70UQ0	Inhibitor of nuclear factor kappa-B kinase-interacting protein OS=Homo sapiens GN=IKBIP PE=1 SV=1 - [IKIP_HUMAN]	1	4	3	√
Q6GPH6	Inositol 1,4,5-trisphosphate receptor-interacting protein-like 1 OS=Homo sapiens GN=ITPRIPL1 PE=1 SV=1 - [IPIL1_HUMAN]	2	1	1			√
O43314	Inositol hexakisphosphate and diphosphoinositol-pentakisphosphate kinase 2 OS=Homo sapiens GN=PPIP5K2 PE=1 SV=3 - [VIP2_HUMAN]	5	8	7		√
Q6P9B9	Integrator complex subunit 5 OS=Homo sapiens GN=INTS5 PE=1 SV=1 - [INT5_HUMAN]	4	5	4	√		√
Q13418	Integrin-linked protein kinase OS=Homo sapiens GN=ILK PE=1 SV=2 - [ILK_HUMAN]	7	5	6	√	√	√
O14862	Interferon-inducible protein AIM2 OS=Homo sapiens GN=AIM2 PE=1 SV=1 - [AIM2_HUMAN]	2	3	2	√
Q8N2Y8	Iporin OS=Homo sapiens GN=RUSC2 PE=1 SV=3 - [RUSC2_HUMAN]	9	4	5		√
P78412	Iroquois-class homeodomain protein IRX-6 OS=Homo sapiens GN=IRX6 PE=2 SV=3 - [IRX6_HUMAN]	6	4	4	√
Q9NSE4	Isoleucine--tRNA ligase, mitochondrial OS=Homo sapiens GN=IARS2 PE=1 SV=2 - [SYIM_HUMAN]	6	4	2		√
Q8WXH2	Junctophilin-3 OS=Homo sapiens GN=JPH3 PE=2 SV=2 - [JPH3_HUMAN]	9	5	3		√	√
Q8IYT4	Katanin p60 ATPase-containing subunit A-like 2 OS=Homo sapiens GN=KATNAL2 PE=1 SV=3 - [KATL2_HUMAN]	6	3	7		√
Q2NLD5	KCNB1 protein (Fragment) OS=Homo sapiens GN=KCNB1 PE=2 SV=1 - [Q2NLD5_HUMAN]	7	6	3		√	√
Q96M94	Kelch-like protein 15 OS=Homo sapiens GN=KLHL15 PE=1 SV=2 - [KLH15_HUMAN]	4	2	4	√
Q5T749	Keratinocyte proline-rich protein OS=Homo sapiens GN=KPRP PE=1 SV=1 - [KPRP_HUMAN]	2	3	1		√
Q8IVT5	Kinase suppressor of Ras 1 OS=Homo sapiens GN=KSR1 PE=1 SV=3 - [KSR1_HUMAN]	6	2	3		√	√
Q4R9M7	Kinesin family member 1Bbeta isoform IV OS=Homo sapiens GN=KIF1Bbeta PE=2 SV=1 - [Q4R9M7_HUMAN]	9	11	7		√
Q9H1H9	Kinesin-like protein KIF13A OS=Homo sapiens GN=KIF13A PE=1 SV=2 - [KI13A_HUMAN]	5	4	9		√
C9JKA9	Kinesin-like protein KIF15 OS=Homo sapiens GN=KIF15 PE=1 SV=1 - [C9JKA9_HUMAN]	6	3	7		√
Q2TAC6	Kinesin-like protein KIF19 OS=Homo sapiens GN=KIF19 PE=2 SV=2 - [KIF19_HUMAN]	4	5	4		√
Q14807	Kinesin-like protein KIF22 OS=Homo sapiens GN=KIF22 PE=1 SV=5 - [KIF22_HUMAN]	6	5	5		√
Q5T7B8	Kinesin-like protein KIF24 OS=Homo sapiens GN=KIF24 PE=1 SV=2 - [KIF24_HUMAN]	9	6	7		√
B7ZC32	Kinesin-like protein KIF28P OS=Homo sapiens GN=KIF28P PE=3 SV=2 - [KIF28_HUMAN]	9	3	5		√
Q2M1P5	Kinesin-like protein KIF7 OS=Homo sapiens GN=KIF7 PE=1 SV=2 - [KIF7_HUMAN]	13	8	14		√
Q96AC6	Kinesin-like protein KIFC2 OS=Homo sapiens GN=KIFC2 PE=2 SV=1 - [KIFC2_HUMAN]	5	4	7		√
I6L965	KRT18 protein (Fragment) OS=Homo sapiens GN=KRT18 PE=2 SV=1 - [I6L965_HUMAN]	5	6	3		√
P42166	Lamina-associated polypeptide 2, isoform alpha OS=Homo sapiens GN=TMPO PE=1 SV=2 - [LAP2A_HUMAN]	5	7	9	√
C9JXK0	Lamin-B receptor (Fragment) OS=Homo sapiens GN=LBR PE=1 SV=1 - [C9JXK0_HUMAN]	5	6	4	√
O15230	Laminin subunit alpha-5 OS=Homo sapiens GN=LAMA5 PE=1 SV=8 - [LAMA5_HUMAN]	12	7	10	√		√
Q9UK59	Lariat debranching enzyme OS=Homo sapiens GN=DBR1 PE=1 SV=2 - [DBR1_HUMAN]	3	3	1	√
Q9HCC9	Lateral signaling target protein 2 homolog OS=Homo sapiens GN=ZFYVE28 PE=1 SV=3 - [LST2_HUMAN]	2	3	7		√
P48357	Leptin receptor OS=Homo sapiens GN=LEPR PE=1 SV=2 - [LEPR_HUMAN]	4	4	5		√
Q9ULH4	Leucine-rich repeat and fibronectin type-III domain-containing protein 2 OS=Homo sapiens GN=LRFN2 PE=1 SV=2 - [LRFN2_HUMAN]	6	4	4			√
Q96M69	Leucine-rich repeat and guanylate kinase domain-containing protein OS=Homo sapiens GN=LRGUK PE=2 SV=1 - [LRGUK_HUMAN]	5	2	3		√
Q9Y608	Leucine-rich repeat flightless-interacting protein 2 OS=Homo sapiens GN=LRRFIP2 PE=1 SV=1 - [LRRF2_HUMAN]	7	4	4	√
Q9UQ13	Leucine-rich repeat protein SHOC-2 OS=Homo sapiens GN=SHOC2 PE=1 SV=2 - [SHOC2_HUMAN]	2	2	2	√	√
Q38SD2	Leucine-rich repeat serine/threonine-protein kinase 1 OS=Homo sapiens GN=LRRK1 PE=1 SV=3 - [LRRK1_HUMAN]	7	4	3		√
Q9Y546	Leucine-rich repeat-containing protein 42 OS=Homo sapiens GN=LRRC42 PE=1 SV=1 - [LRC42_HUMAN]	2	3	2	√	√
Q96CN5	Leucine-rich repeat-containing protein 45 OS=Homo sapiens GN=LRRC45 PE=1 SV=1 - [LRC45_HUMAN]	7	6	5	√	√	√
Q6ZRR7	Leucine-rich repeat-containing protein 9 OS=Homo sapiens GN=LRRC9 PE=2 SV=2 - [LRRC9_HUMAN]	3	4	4	√	√
H0YEF9	Liprin-alpha-1 (Fragment) OS=Homo sapiens GN=PPFIA1 PE=1 SV=1 - [H0YEF9_HUMAN]	6	5	6		√
Q13136	Liprin-alpha-1 OS=Homo sapiens GN=PPFIA1 PE=1 SV=1 - [LIPA1_HUMAN]	7	9	9		√
O75145	Liprin-alpha-3 OS=Homo sapiens GN=PPFIA3 PE=1 SV=3 - [LIPA3_HUMAN]	11	9	10		√	√
Q9Y2F5	Little elongation complex subunit 1 OS=Homo sapiens GN=ICE1 PE=1 SV=5 - [ICE1_HUMAN]	8	8	11	√
Q659A1	Little elongation complex subunit 2 OS=Homo sapiens GN=ICE2 PE=1 SV=2 - [ICE2_HUMAN]	4	3	5	√	√
Q17RB8	LON peptidase N-terminal domain and RING finger protein 1 OS=Homo sapiens GN=LONRF1 PE=1 SV=2 - [LONF1_HUMAN]	3	5	7		√
P28330	Long-chain specific acyl-CoA dehydrogenase, mitochondrial OS=Homo sapiens GN=ACADL PE=1 SV=2 - [ACADL_HUMAN]	5	1	3		√
M0R1R5	Low affinity immunoglobulin epsilon Fc receptor (Fragment) OS=Homo sapiens GN=FCER2 PE=1 SV=1 - [M0R1R5_HUMAN]	2	2	2	√		√
O75197	Low-density lipoprotein receptor-related protein 5 OS=Homo sapiens GN=LRP5 PE=1 SV=2 - [LRP5_HUMAN]	4	4	4		√	√
Q6GPG7	LPAR1 protein OS=Homo sapiens GN=LPAR1 PE=1 SV=1 - [Q6GPG7_HUMAN]	2	2	2		√	√
Q6IAK3	LRP10 protein OS=Homo sapiens GN=LRP10 PE=2 SV=1 - [Q6IAK3_HUMAN]	2	4	1			√
Q4G0N3	LTK protein OS=Homo sapiens GN=LTK PE=2 SV=1 - [Q4G0N3_HUMAN]	1	3	2		√	√
Q8NHM5	Lysine-specific demethylase 2B OS=Homo sapiens GN=KDM2B PE=1 SV=1 - [KDM2B_HUMAN]	7	5	6	√
P29375	Lysine-specific demethylase 5A OS=Homo sapiens GN=KDM5A PE=1 SV=3 - [KDM5A_HUMAN]	9	7	6	√
O15054	Lysine-specific demethylase 6B OS=Homo sapiens GN=KDM6B PE=1 SV=4 - [KDM6B_HUMAN]	6	5	5	√
O43593	Lysine-specific demethylase hairless OS=Homo sapiens GN=HR PE=1 SV=5 - [HAIR_HUMAN]	4	6	7	√
O60341	Lysine-specific histone demethylase 1A OS=Homo sapiens GN=KDM1A PE=1 SV=2 - [KDM1A_HUMAN]	8	5	6	√
Q8NB78	Lysine-specific histone demethylase 1B OS=Homo sapiens GN=KDM1B PE=1 SV=3 - [KDM1B_HUMAN]	4	3	3	√
Q15046	Lysine--tRNA ligase OS=Homo sapiens GN=KARS PE=1 SV=3 - [SYK_HUMAN]	9	5	8	√	√	√
C9J1B9	LysM and putative peptidoglycan-binding domain-containing protein 4 (Fragment) OS=Homo sapiens GN=LYSMD4 PE=4 SV=1 - [C9J1B9_HUMAN]	2	3	1		√	√
E9JVC4	Maelstrom homolog (Drosophila), isoform CRA_c OS=Homo sapiens GN=MAEL PE=1 SV=1 - [E9JVC4_HUMAN]	4	3	2	√	√
Q9Y4C4	Malignant fibrous histiocytoma-amplified sequence 1 OS=Homo sapiens GN=MFHAS1 PE=1 SV=2 - [MFHA1_HUMAN]	1	4	1		√
U5GXS0	MAM and LDL-receptor class A domain-containing protein 1 (Fragment) OS=Homo sapiens GN=MALRD1 PE=4 SV=1 - [U5GXS0_HUMAN]	4	2	3		√	√
H3BN01	Mannose-6-phosphate isomerase (Fragment) OS=Homo sapiens GN=MPI PE=1 SV=1 - [H3BN01_HUMAN]	2	1	1		√
P33908	Mannosyl-oligosaccharide 1,2-alpha-mannosidase IA OS=Homo sapiens GN=MAN1A1 PE=1 SV=3 - [MA1A1_HUMAN]	2	3	3		√
Q8IWC1	MAP7 domain-containing protein 3 OS=Homo sapiens GN=MAP7D3 PE=1 SV=2 - [MA7D3_HUMAN]	9	8	10		√
Q6NX58	MAP7D1 protein (Fragment) OS=Homo sapiens GN=MAP7D1 PE=2 SV=1 - [Q6NX58_HUMAN]	8	6	9		√
D6RAC8	Matrix extracellular phosphoglycoprotein OS=Homo sapiens GN=MEPE PE=1 SV=1 - [D6RAC8_HUMAN]	8	7	4		√
K4RH61	Matrix metalloproteinase 14 (Membrane-inserted) OS=Homo sapiens GN=MMP14 PE=2 SV=1 - [K4RH61_HUMAN]	10	6	7		√	√
Q9Y4F3	Meiosis arrest female protein 1 OS=Homo sapiens GN=KIAA0430 PE=1 SV=6 - [MARF1_HUMAN]	7	5	9		√
Q5TIA1	Meiosis inhibitor protein 1 OS=Homo sapiens GN=MEI1 PE=2 SV=2 - [MEI1_HUMAN]	5	3	4		√	√
Q5JRA6	Melanoma inhibitory activity protein 3 OS=Homo sapiens GN=MIA3 PE=1 SV=1 - [MIA3_HUMAN]	9	8	14		√
Q14703	Membrane-bound transcription factor site-1 protease OS=Homo sapiens GN=MBTPS1 PE=1 SV=1 - [MBTP1_HUMAN]	2	2	2		√
E7ESY4	Metastasis-associated protein MTA1 OS=Homo sapiens GN=MTA1 PE=1 SV=1 - [E7ESY4_HUMAN]	8	4	3	√	√
Q9UBB5	Methyl-CpG-binding domain protein 2 OS=Homo sapiens GN=MBD2 PE=1 SV=1 - [MBD2_HUMAN]	5	7	8	√
F6KRL6	MHC class I antigen (Fragment) OS=Homo sapiens GN=HLA-A PE=3 SV=1 - [F6KRL6_HUMAN]	1	1	1		√	√
V9N3H0	MHC class I antigen (Fragment) OS=Homo sapiens GN=HLA-C PE=3 SV=1 - [V9N3H0_HUMAN]	1	1	1		√	√
Q861B7	MHC class I antigen OS=Homo sapiens GN=HLA-A PE=3 SV=1 - [Q861B7_HUMAN]	1	2	2		√	√
O75121	Microfibrillar-associated protein 3-like OS=Homo sapiens GN=MFAP3L PE=1 SV=3 - [MFA3L_HUMAN]	3	3	2			√
H3BQK9	Microtubule-actin cross-linking factor 1, isoforms 1/2/3/5 OS=Homo sapiens GN=MACF1 PE=1 SV=1 - [H3BQK9_HUMAN]	43	40	46		√	√
P11137	Microtubule-associated protein 2 OS=Homo sapiens GN=MAP2 PE=1 SV=4 - [MTAP2_HUMAN]	15	8	9		√
F8W9U4	Microtubule-associated protein OS=Homo sapiens GN=MAP4 PE=1 SV=1 - [F8W9U4_HUMAN]	10	11	7		√
Q15555	Microtubule-associated protein RP/EB family member 2 OS=Homo sapiens GN=MAPRE2 PE=1 SV=1 - [MARE2_HUMAN]	1	1	2		√
Q9Y2H9	Microtubule-associated serine/threonine-protein kinase 1 OS=Homo sapiens GN=MAST1 PE=1 SV=2 - [MAST1_HUMAN]	9	6	5		√	√
Q8N4C8	Misshapen-like kinase 1 OS=Homo sapiens GN=MINK1 PE=1 SV=2 - [MINK1_HUMAN]	9	3	5		√	√
Q9UPE4	Mitochondrial import inner membrane translocase subunit TIM44 OS=Homo sapiens GN=hTIM44 PE=2 SV=1 - [Q9UPE4_HUMAN]	4	4	7		√
Q8IXI2	Mitochondrial Rho GTPase 1 OS=Homo sapiens GN=RHOT1 PE=1 SV=2 - [MIRO1_HUMAN]	5	4	6		√
Q96A46	Mitoferrin-2 OS=Homo sapiens GN=SLC25A28 PE=2 SV=1 - [MFRN2_HUMAN]	3	2	1		√
Q15759	Mitogen-activated protein kinase 11 OS=Homo sapiens GN=MAPK11 PE=1 SV=2 - [MK11_HUMAN]	1	2	1	√	√
Q99558	Mitogen-activated protein kinase kinase kinase 14 OS=Homo sapiens GN=MAP3K14 PE=1 SV=2 - [M3K14_HUMAN]	4	7	5		√
F5H4R1	Mitogen-activated protein kinase kinase kinase 4 OS=Homo sapiens GN=MAP3K4 PE=1 SV=1 - [F5H4R1_HUMAN]	6	5	6		√
Q7L4E1	Mitoguardin 2 OS=Homo sapiens GN=MIGA2 PE=1 SV=1 - [MIGA2_HUMAN]	6	3	5		√	√
J3QT28	Mitotic checkpoint protein BUB3 (Fragment) OS=Homo sapiens GN=BUB3 PE=1 SV=1 - [J3QT28_HUMAN]	9	10	6	√
O60566	Mitotic checkpoint serine/threonine-protein kinase BUB1 beta OS=Homo sapiens GN=BUB1B PE=1 SV=3 - [BUB1B_HUMAN]	3	5	3	√	√
Q9NZB8	Molybdenum cofactor biosynthesis protein 1 OS=Homo sapiens GN=MOCS1 PE=1 SV=3 - [MOCS1_HUMAN]	3	5	3	√	√
Q6UB35	Monofunctional C1-tetrahydrofolate synthase, mitochondrial OS=Homo sapiens GN=MTHFD1L PE=1 SV=1 - [C1TM_HUMAN]	12	13	13		√
Q8TE76	MORC family CW-type zinc finger protein 4 OS=Homo sapiens GN=MORC4 PE=1 SV=2 - [MORC4_HUMAN]	8	6	8	√
O43541	Mothers against decapentaplegic homolog 6 OS=Homo sapiens GN=SMAD6 PE=1 SV=2 - [SMAD6_HUMAN]	4	2	1	√
D3DR32	M-phase phosphoprotein 1, isoform CRA_a OS=Homo sapiens GN=MPHOSPH1 PE=3 SV=1 - [D3DR32_HUMAN]	14	14	11	√
Q99549	M-phase phosphoprotein 8 OS=Homo sapiens GN=MPHOSPH8 PE=1 SV=2 - [MPP8_HUMAN]	5	5	4	√
Q86VL8	Multidrug and toxin extrusion protein 2 OS=Homo sapiens GN=SLC47A2 PE=1 SV=1 - [S47A2_HUMAN]	3	1	2			√
O95255	Multidrug resistance-associated protein 6 OS=Homo sapiens GN=ABCC6 PE=1 SV=2 - [MRP6_HUMAN]	7	6	5	√	√	√
Q96J65	Multidrug resistance-associated protein 9 OS=Homo sapiens GN=ABCC12 PE=1 SV=2 - [MRP9_HUMAN]	5	4	4		√	√
Q7Z7M0	Multiple epidermal growth factor-like domains protein 8 OS=Homo sapiens GN=MEGF8 PE=1 SV=2 - [MEGF8_HUMAN]	8	9	8	√
Q9Y2K3	Myosin-15 OS=Homo sapiens GN=MYH15 PE=1 SV=5 - [MYH15_HUMAN]	14	14	19		√
Q9UKX2	Myosin-2 OS=Homo sapiens GN=MYH2 PE=1 SV=1 - [MYH2_HUMAN]	19	15	16		√
P11055	Myosin-3 OS=Homo sapiens GN=MYH3 PE=1 SV=3 - [MYH3_HUMAN]	17	8	16		√
Q9Y623	Myosin-4 OS=Homo sapiens GN=MYH4 PE=2 SV=2 - [MYH4_HUMAN]	16	14	14		√
Q8NEV4	Myosin-IIIa OS=Homo sapiens GN=MYO3A PE=2 SV=2 - [MYO3A_HUMAN]	6	8	5		√
Q86WG5	Myotubularin-related protein 13 OS=Homo sapiens GN=SBF2 PE=1 SV=1 - [MTMRD_HUMAN]	9	7	4		√	√
J3QR65	Myotubularin-related protein 4 OS=Homo sapiens GN=MTMR4 PE=1 SV=1 - [J3QR65_HUMAN]	3	1	1		√	√
Q9Y217	Myotubularin-related protein 6 OS=Homo sapiens GN=MTMR6 PE=1 SV=3 - [MTMR6_HUMAN]	2	2	2	√
H0YEA7	N-acetylglucosamine-1-phosphotransferase subunit gamma (Fragment) OS=Homo sapiens GN=GNPTG PE=1 SV=8 - [H0YEA7_HUMAN]	2	1	1		√
P59045	NACHT, LRR and PYD domains-containing protein 11 OS=Homo sapiens GN=NLRP11 PE=2 SV=2 - [NAL11_HUMAN]	2	3	8		√	√
Q96P20	NACHT, LRR and PYD domains-containing protein 3 OS=Homo sapiens GN=NLRP3 PE=1 SV=3 - [NLRP3_HUMAN]	2	3	4		√
Q86W28	NACHT, LRR and PYD domains-containing protein 8 OS=Homo sapiens GN=NLRP8 PE=2 SV=2 - [NALP8_HUMAN]	2	2	2		√
P23368	NAD-dependent malic enzyme, mitochondrial OS=Homo sapiens GN=ME2 PE=1 SV=1 - [MAOM_HUMAN]	4	7	5		√
K7EK87	Nectin-2 (Fragment) OS=Homo sapiens GN=NECTIN2 PE=4 SV=1 - [K7EK87_HUMAN]	1	3	1		√	√
O15049	NEDD4-binding protein 3 OS=Homo sapiens GN=N4BP3 PE=1 SV=3 - [N4BP3_HUMAN]	4	3	2		√
P16519	Neuroendocrine convertase 2 OS=Homo sapiens GN=PCSK2 PE=2 SV=2 - [NEC2_HUMAN]	3	4	5		√
P21359	Neurofibromin OS=Homo sapiens GN=NF1 PE=1 SV=2 - [NF1_HUMAN]	8	18	11	√
Q04721	Neurogenic locus notch homolog protein 2 OS=Homo sapiens GN=NOTCH2 PE=1 SV=3 - [NOTC2_HUMAN]	9	9	9	√	√	√
Q6ZVC0	Neuronal tyrosine-phosphorylated phosphoinositide-3-kinase adapter 1 OS=Homo sapiens GN=NYAP1 PE=2 SV=1 - [NYAP1_HUMAN]	6	6	2	√
Q8IY17	Neuropathy target esterase OS=Homo sapiens GN=PNPLA6 PE=1 SV=2 - [PLPL6_HUMAN]	5	3	7		√
Q5SYE7	NHS-like protein 1 OS=Homo sapiens GN=NHSL1 PE=1 SV=2 - [NHSL1_HUMAN]	6	8	8	√	√
K7EQ23	Niemann-Pick C1 protein (Fragment) OS=Homo sapiens GN=NPC1 PE=1 SV=1 - [K7EQ23_HUMAN]	2	3	2		√
Q7Z2Y5	Nik-related protein kinase OS=Homo sapiens GN=NRK PE=1 SV=2 - [NRK_HUMAN]	3	5	7		√
Q92982	Ninjurin-1 OS=Homo sapiens GN=NINJ1 PE=1 SV=2 - [NINJ1_HUMAN]	1	1	1		√	√
Q8NDF8	Non-canonical poly(A) RNA polymerase PAPD5 OS=Homo sapiens GN=PAPD5 PE=1 SV=2 - [PAPD5_HUMAN]	3	6	2	√
Q13470	Non-receptor tyrosine-protein kinase TNK1 OS=Homo sapiens GN=TNK1 PE=1 SV=3 - [TNK1_HUMAN]	2	4	2		√	√
G3V5V3	Nuclear export mediator factor NEMF (Fragment) OS=Homo sapiens GN=NEMF PE=1 SV=8 - [G3V5V3_HUMAN]	5	11	3	√
Q7Z417	Nuclear fragile X mental retardation-interacting protein 2 OS=Homo sapiens GN=NUFIP2 PE=1 SV=1 - [NUFP2_HUMAN]	7	5	3	√	√
Q68CJ6	Nuclear GTPase SLIP-GC OS=Homo sapiens GN=NUGGC PE=2 SV=3 - [SLIP_HUMAN]	4	3	3	√
J3QL54	Nuclear pore complex protein Nup85 OS=Homo sapiens GN=NUP85 PE=1 SV=1 - [J3QL54_HUMAN]	6	4	4	√
B9EG70	Nuclear protein, ataxia-telangiectasia locus OS=Homo sapiens GN=NPAT PE=2 SV=1 - [B9EG70_HUMAN]	7	3	5	√
Q0IIN7	Nuclear receptor coactivator 3 OS=Homo sapiens GN=NCOA3 PE=2 SV=1 - [Q0IIN7_HUMAN]	6	7	4	√	√
E9PIN3	Nuclear RNA export factor 1 (Fragment) OS=Homo sapiens GN=NXF1 PE=1 SV=1 - [E9PIN3_HUMAN]	5	2	2	√	√
P19338	Nucleolin OS=Homo sapiens GN=NCL PE=1 SV=3 - [NUCL_HUMAN]	16	20	15	√	√
Q9BTX1	Nucleoporin NDC1 OS=Homo sapiens GN=NDC1 PE=1 SV=2 - [NDC1_HUMAN]	5	5	3	√
Q96BF6	Nucleus accumbens-associated protein 2 OS=Homo sapiens GN=NACC2 PE=1 SV=1 - [NACC2_HUMAN]	2	2	3	√
Q8TE49	OTU domain-containing protein 7A OS=Homo sapiens GN=OTUD7A PE=1 SV=1 - [OTU7A_HUMAN]	9	11	8	√	√
Q6GQQ9	OTU domain-containing protein 7B OS=Homo sapiens GN=OTUD7B PE=1 SV=1 - [OTU7B_HUMAN]	3	6	6	√	√
P56715	Oxygen-regulated protein 1 OS=Homo sapiens GN=RP1 PE=1 SV=1 - [RP1_HUMAN]	6	7	5		√
Q9H4L5	Oxysterol-binding protein-related protein 3 OS=Homo sapiens GN=OSBPL3 PE=1 SV=1 - [OSBL3_HUMAN]	3	5	6	√	√
Q9HB75	p53-induced death domain-containing protein 1 OS=Homo sapiens GN=PIDD1 PE=1 SV=2 - [PIDD1_HUMAN]	4	2	4	√	√
O75182	Paired amphipathic helix protein Sin3b OS=Homo sapiens GN=SIN3B PE=1 SV=2 - [SIN3B_HUMAN]	8	5	15	√
Q9NUE0	Palmitoyltransferase ZDHHC18 OS=Homo sapiens GN=ZDHHC18 PE=1 SV=2 - [ZDH18_HUMAN]	4	4	2		√	√
Q7RTS3	Pancreas transcription factor 1 subunit alpha OS=Homo sapiens GN=PTF1A PE=1 SV=1 - [PTF1A_HUMAN]	1	2	1	√	√
Q9NPB6	Partitioning defective 6 homolog alpha OS=Homo sapiens GN=PARD6A PE=1 SV=1 - [PAR6A_HUMAN]	4	5	5		√	√
Q9NST1	Patatin-like phospholipase domain-containing protein 3 OS=Homo sapiens GN=PNPLA3 PE=1 SV=2 - [PLPL3_HUMAN]	1	1	2		√
Q8NEN9	PDZ domain-containing protein 8 OS=Homo sapiens GN=PDZD8 PE=1 SV=1 - [PDZD8_HUMAN]	8	12	12		√
Q9H6A9	Pecanex-like protein 3 OS=Homo sapiens GN=PCNX3 PE=1 SV=2 - [PCX3_HUMAN]	5	4	6		√	√
Q8IYS1	Peptidase M20 domain-containing protein 2 OS=Homo sapiens GN=PM20D2 PE=1 SV=2 - [P20D2_HUMAN]	1	2	1	√
K7EKI8	Periplakin OS=Homo sapiens GN=PPL PE=1 SV=1 - [K7EKI8_HUMAN]	8	5	12	√	√	√
O75420	PERQ amino acid-rich with GYF domain-containing protein 1 OS=Homo sapiens GN=GIGYF1 PE=1 SV=2 - [PERQ1_HUMAN]	5	8	5	√	√
F8WBF1	PERQ amino acid-rich with GYF domain-containing protein 2 OS=Homo sapiens GN=GIGYF2 PE=1 SV=1 - [F8WBF1_HUMAN]	2	1	2	√	√
B5MCF9	Pescadillo homolog OS=Homo sapiens GN=PES1 PE=1 SV=1 - [B5MCF9_HUMAN]	7	12	8	√
Q6ZVD8	PH domain leucine-rich repeat-containing protein phosphatase 2 OS=Homo sapiens GN=PHLPP2 PE=1 SV=3 - [PHLP2_HUMAN]	3	4	4	√	√	√
Q9BVI0	PHD finger protein 20 OS=Homo sapiens GN=PHF20 PE=1 SV=2 - [PHF20_HUMAN]	6	3	3	√
Q96BD5	PHD finger protein 21A OS=Homo sapiens GN=PHF21A PE=1 SV=1 - [PF21A_HUMAN]	5	2	4	√
Q92835	Phosphatidylinositol 3,4,5-trisphosphate 5-phosphatase 1 OS=Homo sapiens GN=INPP5D PE=1 SV=2 - [SHIP1_HUMAN]	4	4	7		√	√
Q8TCU6	Phosphatidylinositol 3,4,5-trisphosphate-dependent Rac exchanger 1 protein OS=Homo sapiens GN=PREX1 PE=1 SV=3 - [PREX1_HUMAN]	7	5	7		√
Q9UBF8	Phosphatidylinositol 4-kinase beta OS=Homo sapiens GN=PI4KB PE=1 SV=1 - [PI4KB_HUMAN]	5	4	5		√
O00443	Phosphatidylinositol 4-phosphate 3-kinase C2 domain-containing subunit alpha OS=Homo sapiens GN=PIK3C2A PE=1 SV=2 - [P3C2A_HUMAN]	4	9	9	√	√	√
O75747	Phosphatidylinositol 4-phosphate 3-kinase C2 domain-containing subunit gamma OS=Homo sapiens GN=PIK3C2G PE=1 SV=3 - [P3C2G_HUMAN]	5	3	1		√	√
P78356	Phosphatidylinositol 5-phosphate 4-kinase type-2 beta OS=Homo sapiens GN=PIP4K2B PE=1 SV=1 - [PI42B_HUMAN]	2	5	2		√	√
Q6VY07	Phosphofurin acidic cluster sorting protein 1 OS=Homo sapiens GN=PACS1 PE=1 SV=2 - [PACS1_HUMAN]	3	5	5		√
F8VW41	Phosphofurin acidic cluster sorting protein 2 OS=Homo sapiens GN=PACS2 PE=1 SV=1 - [F8VW41_HUMAN]	3	3	5		√
Q15124	Phosphoglucomutase-like protein 5 OS=Homo sapiens GN=PGM5 PE=1 SV=2 - [PGM5_HUMAN]	5	2	2		√
P18669	Phosphoglycerate mutase 1 OS=Homo sapiens GN=PGAM1 PE=1 SV=2 - [PGAM1_HUMAN]	8	7	9		√
P98198	Phospholipid-transporting ATPase ID OS=Homo sapiens GN=ATP8B2 PE=1 SV=2 - [AT8B2_HUMAN]	5	6	6		√	√
Q14558	Phosphoribosyl pyrophosphate synthase-associated protein 1 OS=Homo sapiens GN=PRPSAP1 PE=1 SV=2 - [KPRA_HUMAN]	6	8	9		√
M4QHP2	Piezo-type mechanosensitive ion channel component OS=Homo sapiens GN=PIEZO1 PE=2 SV=1 - [M4QHP2_HUMAN]	7	9	8		√
B7ZM86	PIK3C2B protein OS=Homo sapiens GN=PIK3C2B PE=2 SV=1 - [B7ZM86_HUMAN]	4	3	8	√	√	√
Q7Z3Z4	Piwi-like protein 4 OS=Homo sapiens GN=PIWIL4 PE=2 SV=2 - [PIWL4_HUMAN]	5	3	4	√	√
Q5RGS4	Pleckstrin homology domain-containing family A member 1 OS=Homo sapiens GN=PLEKHA1 PE=1 SV=1 - [Q5RGS4_HUMAN]	4	2	5	√	√	√
E9PMV1	Plectin (Fragment) OS=Homo sapiens GN=PLEC PE=1 SV=1 - [E9PMV1_HUMAN]	20	19	18		√
Q9UIW2	Plexin-A1 OS=Homo sapiens GN=PLXNA1 PE=1 SV=3 - [PLXA1_HUMAN]	7	6	7		√	√
O75051	Plexin-A2 OS=Homo sapiens GN=PLXNA2 PE=1 SV=4 - [PLXA2_HUMAN]	5	5	5			√
O60486	Plexin-C1 OS=Homo sapiens GN=PLXNC1 PE=1 SV=1 - [PLXC1_HUMAN]	4	5	3		√	√
Q9NP85	Podocin OS=Homo sapiens GN=NPHS2 PE=1 SV=1 - [PODO_HUMAN]	3	4	3		√	√
Q7Z3K3	Pogo transposable element with ZNF domain OS=Homo sapiens GN=POGZ PE=1 SV=2 - [POGZ_HUMAN]	7	3	6	√	√
Q460N5	Poly [ADP-ribose] polymerase 14 OS=Homo sapiens GN=PARP14 PE=1 SV=3 - [PAR14_HUMAN]	7	9	6	√	√
Q49AI7	Poly [ADP-ribose] polymerase OS=Homo sapiens GN=PARP8 PE=2 SV=1 - [Q49AI7_HUMAN]	4	5	5	√	√
Q9NRJ5	Poly(A) polymerase beta OS=Homo sapiens GN=PAPOLB PE=2 SV=1 - [PAPOB_HUMAN]	3	2	3	√
Q9NVV4	Poly(A) RNA polymerase, mitochondrial OS=Homo sapiens GN=MTPAP PE=1 SV=1 - [PAPD1_HUMAN]	5	4	2		√
J3QQW9	Polycomb protein SUZ12 OS=Homo sapiens GN=SUZ12 PE=1 SV=1 - [J3QQW9_HUMAN]	2	2	4	√
P98161	Polycystin-1 OS=Homo sapiens GN=PKD1 PE=1 SV=3 - [PKD1_HUMAN]	3	8	13		√	√
Q8TCS8	Polyribonucleotide nucleotidyltransferase 1, mitochondrial OS=Homo sapiens GN=PNPT1 PE=1 SV=2 - [PNPT1_HUMAN]	10	6	2		√
Q8NCM2	Potassium voltage-gated channel subfamily H member 5 OS=Homo sapiens GN=KCNH5 PE=1 SV=3 - [KCNH5_HUMAN]	5	6	5		√	√
B9EK44	Potassium voltage-gated channel, subfamily H (Eag-related), member 3 OS=Homo sapiens GN=KCNH3 PE=2 SV=1 - [B9EK44_HUMAN]	4	4	2	√		√
Q9UL51	Potassium/sodium hyperpolarization-activated cyclic nucleotide-gated channel 2 OS=Homo sapiens GN=HCN2 PE=1 SV=3 - [HCN2_HUMAN]	3	3	3		√	√
Q9Y3Q4	Potassium/sodium hyperpolarization-activated cyclic nucleotide-gated channel 4 OS=Homo sapiens GN=HCN4 PE=1 SV=1 - [HCN4_HUMAN]	7	3	4		√	√
P54707	Potassium-transporting ATPase alpha chain 2 OS=Homo sapiens GN=ATP12A PE=1 SV=3 - [AT12A_HUMAN]	7	6	6		√	√
O75626	PR domain zinc finger protein 1 OS=Homo sapiens GN=PRDM1 PE=1 SV=2 - [PRDM1_HUMAN]	4	2	3	√	√
Q9H4Q3	PR domain zinc finger protein 13 OS=Homo sapiens GN=PRDM13 PE=2 SV=2 - [PRD13_HUMAN]	2	4	4	√
Q9C0J8	pre-mRNA 3' end processing protein WDR33 OS=Homo sapiens GN=WDR33 PE=1 SV=2 - [WDR33_HUMAN]	7	12	3	√
Q2NL82	Pre-rRNA-processing protein TSR1 homolog OS=Homo sapiens GN=TSR1 PE=1 SV=1 - [TSR1_HUMAN]	3	5	5	√
Q86TM3	Probable ATP-dependent RNA helicase DDX53 OS=Homo sapiens GN=DDX53 PE=1 SV=3 - [DDX53_HUMAN]	4	5	5	√
Q8IY37	Probable ATP-dependent RNA helicase DHX37 OS=Homo sapiens GN=DHX37 PE=1 SV=1 - [DHX37_HUMAN]	7	5	7	√
J3KPF0	Probable E3 ubiquitin-protein ligase HECTD4 OS=Homo sapiens GN=HECTD4 PE=1 SV=3 - [J3KPF0_HUMAN]	20	18	21	√	√	√
Q8IVU3	Probable E3 ubiquitin-protein ligase HERC6 OS=Homo sapiens GN=HERC6 PE=2 SV=2 - [HERC6_HUMAN]	5	5	9		√
Q86YR7	Probable guanine nucleotide exchange factor MCF2L2 OS=Homo sapiens GN=MCF2L2 PE=2 SV=3 - [MF2L2_HUMAN]	3	3	6		√
Q7Z333	Probable helicase senataxin OS=Homo sapiens GN=SETX PE=1 SV=4 - [SETX_HUMAN]	17	15	15	√	√
O43861	Probable phospholipid-transporting ATPase IIB OS=Homo sapiens GN=ATP9B PE=2 SV=4 - [ATP9B_HUMAN]	4	4	3		√	√
Q9P241	Probable phospholipid-transporting ATPase VD OS=Homo sapiens GN=ATP10D PE=2 SV=3 - [AT10D_HUMAN]	7	7	3		√	√
O00507	Probable ubiquitin carboxyl-terminal hydrolase FAF-Y OS=Homo sapiens GN=USP9Y PE=2 SV=2 - [USP9Y_HUMAN]	8	10	6		√
Q8NBJ5	Procollagen galactosyltransferase 1 OS=Homo sapiens GN=COLGALT1 PE=1 SV=1 - [GT251_HUMAN]	4	8	7		√
P01133	Pro-epidermal growth factor OS=Homo sapiens GN=EGF PE=1 SV=2 - [EGF_HUMAN]	3	2	7	√	√	√
D3DNI2	Profilin (Fragment) OS=Homo sapiens GN=PFN2 PE=3 SV=1 - [D3DNI2_HUMAN]	4	3	2		√
P12004	Proliferating cell nuclear antigen OS=Homo sapiens GN=PCNA PE=1 SV=1 - [PCNA_HUMAN]	5	5	3	√
Q9ULL5	Proline-rich protein 12 OS=Homo sapiens GN=PRR12 PE=1 SV=2 - [PRR12_HUMAN]	7	3	5	√
P0CG20	Proline-rich protein 35 OS=Homo sapiens GN=PRR35 PE=2 SV=1 - [PRR35_HUMAN]	4	3	3	√	√
Q9P2B2	Prostaglandin F2 receptor negative regulator OS=Homo sapiens GN=PTGFRN PE=1 SV=2 - [FPRP_HUMAN]	3	6	6		√
Q06323	Proteasome activator complex subunit 1 OS=Homo sapiens GN=PSME1 PE=1 SV=1 - [PSME1_HUMAN]	2	3	4	√	√
P60900	Proteasome subunit alpha type-6 OS=Homo sapiens GN=PSMA6 PE=1 SV=1 - [PSA6_HUMAN]	3	3	3	√	√
Q9HCK5	Protein argonaute-4 OS=Homo sapiens GN=AGO4 PE=1 SV=2 - [AGO4_HUMAN]	6	5	7		√
Q2TB18	Protein asteroid homolog 1 OS=Homo sapiens GN=ASTE1 PE=1 SV=1 - [ASTE1_HUMAN]	4	2	5		√	√
Q96G01	Protein bicaudal D homolog 1 OS=Homo sapiens GN=BICD1 PE=1 SV=3 - [BICD1_HUMAN]	10	9	11		√
O75128	Protein cordon-bleu OS=Homo sapiens GN=COBL PE=1 SV=2 - [COBL_HUMAN]	10	7	6	√
P0C7U0	Protein ELFN1 OS=Homo sapiens GN=ELFN1 PE=1 SV=2 - [ELFN1_HUMAN]	7	4	6			√
Q4ZG55	Protein GREB1 OS=Homo sapiens GN=GREB1 PE=2 SV=1 - [GREB1_HUMAN]	3	4	4		√	√
Q9H799	Protein JBTS17 OS=Homo sapiens GN=C5orf42 PE=1 SV=4 - [CE042_HUMAN]	13	6	10	√	√
Q969G5	Protein kinase C delta-binding protein OS=Homo sapiens GN=PRKCDBP PE=1 SV=3 - [PRDBP_HUMAN]	3	1	1		√
Q86UE4	Protein LYRIC OS=Homo sapiens GN=MTDH PE=1 SV=2 - [LYRIC_HUMAN]	10	5	6	√	√
Q7Z4T9	Protein MAATS1 OS=Homo sapiens GN=MAATS1 PE=1 SV=2 - [MAAT1_HUMAN]	3	7	2	√	√
Q86WI3	Protein NLRC5 OS=Homo sapiens GN=NLRC5 PE=1 SV=3 - [NLRC5_HUMAN]	3	6	6		√
Q9P2P1	Protein NYNRIN OS=Homo sapiens GN=NYNRIN PE=2 SV=3 - [NYNRI_HUMAN]	7	6	7	√	√	√
O43245	Protein p65 OS=Homo sapiens GN=p65 PE=2 SV=2 - [O43245_HUMAN]	6	6	3	√	√
Q86TB9	Protein PAT1 homolog 1 OS=Homo sapiens GN=PATL1 PE=1 SV=2 - [PATL1_HUMAN]	5	4	2		√
Q6ZMI0	Protein phosphatase 1 regulatory subunit 21 OS=Homo sapiens GN=PPP1R21 PE=1 SV=1 - [PPR21_HUMAN]	2	8	6	√	√
Q9ULR3	Protein phosphatase 1H OS=Homo sapiens GN=PPM1H PE=1 SV=2 - [PPM1H_HUMAN]	6	3	3	√
Q8WYL5	Protein phosphatase Slingshot homolog 1 OS=Homo sapiens GN=SSH1 PE=1 SV=2 - [SSH1_HUMAN]	5	6	3		√
Q86U86	Protein polybromo-1 OS=Homo sapiens GN=PBRM1 PE=1 SV=1 - [PB1_HUMAN]	10	7	9	√
Q5THK1	Protein PRR14L OS=Homo sapiens GN=PRR14L PE=1 SV=1 - [PR14L_HUMAN]	7	7	13	√
Q96M27	Protein PRRC1 OS=Homo sapiens GN=PRRC1 PE=1 SV=1 - [PRRC1_HUMAN]	5	2	2		√
Q99590	Protein SCAF11 OS=Homo sapiens GN=SCAF11 PE=1 SV=2 - [SCAFB_HUMAN]	6	10	7	√	√
E7ERC8	Protein SEC13 homolog (Fragment) OS=Homo sapiens GN=SEC13 PE=1 SV=1 - [E7ERC8_HUMAN]	1	1	1	√	√
Q9ULL8	Protein Shroom4 OS=Homo sapiens GN=SHROOM4 PE=1 SV=3 - [SHRM4_HUMAN]	5	5	4		√
F8W6X9	Protein sidekick-1 OS=Homo sapiens GN=SDK1 PE=1 SV=1 - [F8W6X9_HUMAN]	6	4	6		√	√
Q58EX2	Protein sidekick-2 OS=Homo sapiens GN=SDK2 PE=1 SV=3 - [SDK2_HUMAN]	6	6	5	√
Q8ND04	Protein SMG8 OS=Homo sapiens GN=SMG8 PE=1 SV=1 - [SMG8_HUMAN]	4	5	1	√	√
P18583	Protein SON OS=Homo sapiens GN=SON PE=1 SV=4 - [SON_HUMAN]	6	7	5	√
K7ES28	Protein strawberry notch homolog 2 OS=Homo sapiens GN=SBNO2 PE=1 SV=1 - [K7ES28_HUMAN]	3	4	5	√	√
Q9C0H2	Protein tweety homolog 3 OS=Homo sapiens GN=TTYH3 PE=1 SV=3 - [TTYH3_HUMAN]	2	1	1			√
F8VZH8	Protein unc-13 homolog A OS=Homo sapiens GN=UNC13A PE=1 SV=1 - [F8VZH8_HUMAN]	10	4	7		√	√
Q8N2C7	Protein unc-80 homolog OS=Homo sapiens GN=UNC80 PE=1 SV=2 - [UNC80_HUMAN]	10	7	16	√	√	√
Q76NI1	Protein very KIND OS=Homo sapiens GN=KNDC1 PE=2 SV=2 - [VKIND_HUMAN]	4	6	5	√	√
Q69YN4	Protein virilizer homolog OS=Homo sapiens GN=KIAA1429 PE=1 SV=2 - [VIR_HUMAN]	9	7	7	√
O95785	Protein Wiz OS=Homo sapiens GN=WIZ PE=1 SV=2 - [WIZ_HUMAN]	8	8	8	√
D6RGY8	Protein YIPF3 (Fragment) OS=Homo sapiens GN=YIPF3 PE=1 SV=1 - [D6RGY8_HUMAN]	3	2	2		√	√
Q96RI0	Proteinase-activated receptor 4 OS=Homo sapiens GN=F2RL3 PE=1 SV=3 - [PAR4_HUMAN]	2	2	1		√	√
Q9NYQ8	Protocadherin Fat 2 OS=Homo sapiens GN=FAT2 PE=1 SV=2 - [FAT2_HUMAN]	4	8	8	√
Q9Y5G2	Protocadherin gamma-B2 OS=Homo sapiens GN=PCDHGB2 PE=2 SV=1 - [PCDGE_HUMAN]	5	4	2			√
Q9Y5F9	Protocadherin gamma-B6 OS=Homo sapiens GN=PCDHGB6 PE=2 SV=1 - [PCDGI_HUMAN]	3	4	4			√
Q2NLD4	PURA protein (Fragment) OS=Homo sapiens GN=PURA PE=2 SV=1 - [Q2NLD4_HUMAN]	4	4	6	√
Q8N7Z5	Putative ankyrin repeat domain-containing protein 31 OS=Homo sapiens GN=ANKRD31 PE=5 SV=2 - [ANR31_HUMAN]	11	11	10	√
Q9NP73	Putative bifunctional UDP-N-acetylglucosamine transferase and deubiquitinase ALG13 OS=Homo sapiens GN=ALG13 PE=1 SV=2 - [ALG13_HUMAN]	5	5	4		√
Q58FF3	Putative endoplasmin-like protein OS=Homo sapiens GN=HSP90B2P PE=5 SV=1 - [ENPLL_HUMAN]	7	7	5		√
Q9NQX0	Putative histone-lysine N-methyltransferase PRDM6 OS=Homo sapiens GN=PRDM6 PE=1 SV=2 - [PRDM6_HUMAN]	3	4	2	√
Q9C0F0	Putative Polycomb group protein ASXL3 OS=Homo sapiens GN=ASXL3 PE=2 SV=3 - [ASXL3_HUMAN]	7	11	6	√
Q6P2P2	Putative protein arginine N-methyltransferase 9 OS=Homo sapiens GN=PRMT9 PE=2 SV=1 - [ANM9_HUMAN]	7	3	4	√
Q8IXW5	Putative RNA polymerase II subunit B1 CTD phosphatase RPAP2 OS=Homo sapiens GN=RPAP2 PE=1 SV=1 - [RPAP2_HUMAN]	3	3	2	√
Q8NDT2	Putative RNA-binding protein 15B OS=Homo sapiens GN=RBM15B PE=1 SV=3 - [RB15B_HUMAN]	9	10	8	√
Q9GZW5	Putative SCAN domain-containing protein SCAND2P OS=Homo sapiens GN=SCAND2P PE=5 SV=2 - [SCND2_HUMAN]	2	4	5	√
Q9HBR0	Putative sodium-coupled neutral amino acid transporter 10 OS=Homo sapiens GN=SLC38A10 PE=1 SV=2 - [S38AA_HUMAN]	5	5	2		√	√
Q5T440	Putative transferase CAF17, mitochondrial OS=Homo sapiens GN=IBA57 PE=1 SV=1 - [CAF17_HUMAN]	2	2	2		√
Q92670	Putative zinc finger protein 75C OS=Homo sapiens GN=ZNF75CP PE=5 SV=2 - [ZN75C_HUMAN]	2	2	2	√
Q96N64	PWWP domain-containing protein 2A OS=Homo sapiens GN=PWWP2A PE=1 SV=2 - [PWP2A_HUMAN]	4	7	4	√
Q6K0P9	Pyrin and HIN domain-containing protein 1 OS=Homo sapiens GN=PYHIN1 PE=1 SV=1 - [IFIX_HUMAN]	5	2	6	√
O15553	Pyrin OS=Homo sapiens GN=MEFV PE=1 SV=1 - [MEFV_HUMAN]	4	5	3	√	√
Q8NFW9	Rab effector MyRIP OS=Homo sapiens GN=MYRIP PE=1 SV=2 - [MYRIP_HUMAN]	4	4	4		√
Q86YS3	Rab11 family-interacting protein 4 OS=Homo sapiens GN=RAB11FIP4 PE=1 SV=1 - [RFIP4_HUMAN]	3	8	5		√	√
Q6AZ91	RAB6B protein OS=Homo sapiens GN=RAB6B PE=2 SV=1 - [Q6AZ91_HUMAN]	6	5	3		√
Q6IAA8	Ragulator complex protein LAMTOR1 OS=Homo sapiens GN=LAMTOR1 PE=1 SV=2 - [LTOR1_HUMAN]	3	4	2		√	√
Q86VV4	Ran-binding protein 3-like OS=Homo sapiens GN=RANBP3L PE=2 SV=2 - [RNB3L_HUMAN]	5	3	3	√	√
Q9BYM8	RanBP-type and C3HC4-type zinc finger-containing protein 1 OS=Homo sapiens GN=RBCK1 PE=1 SV=2 - [HOIL1_HUMAN]	3	3	3	√	√
Q6ZS11	Ras and Rab interactor-like protein OS=Homo sapiens GN=RINL PE=2 SV=2 - [RINL_HUMAN]	3	3	2		√
Q14644	Ras GTPase-activating protein 3 OS=Homo sapiens GN=RASA3 PE=1 SV=3 - [RASA3_HUMAN]	4	3	3		√	√
Q13283	Ras GTPase-activating protein-binding protein 1 OS=Homo sapiens GN=G3BP1 PE=1 SV=1 - [G3BP1_HUMAN]	6	4	4	√	√	√
F2Z2E2	Ras GTPase-activating-like protein IQGAP3 OS=Homo sapiens GN=IQGAP3 PE=1 SV=1 - [F2Z2E2_HUMAN]	7	7	8		√
Q5VZM0	Ras-related GTP-binding protein B (Fragment) OS=Homo sapiens GN=RRAGB PE=1 SV=1 - [Q5VZM0_HUMAN]	2	4	3	√	√
P61106	Ras-related protein Rab-14 OS=Homo sapiens GN=RAB14 PE=1 SV=4 - [RAB14_HUMAN]	13	12	10		√	√
Q9NP72	Ras-related protein Rab-18 OS=Homo sapiens GN=RAB18 PE=1 SV=1 - [RAB18_HUMAN]	12	6	14		√	√
Q9H0U4	Ras-related protein Rab-1B OS=Homo sapiens GN=RAB1B PE=1 SV=1 - [RAB1B_HUMAN]	13	12	13		√	√
Q9UL26	Ras-related protein Rab-22A OS=Homo sapiens GN=RAB22A PE=1 SV=2 - [RB22A_HUMAN]	5	5	3		√	√
Q9ULC3	Ras-related protein Rab-23 OS=Homo sapiens GN=RAB23 PE=1 SV=1 - [RAB23_HUMAN]	2	4	2		√	√
P61019	Ras-related protein Rab-2A OS=Homo sapiens GN=RAB2A PE=1 SV=1 - [RAB2A_HUMAN]	10	8	10		√
Q13636	Ras-related protein Rab-31 OS=Homo sapiens GN=RAB31 PE=1 SV=1 - [RAB31_HUMAN]	3	7	3		√	√
Q15286	Ras-related protein Rab-35 OS=Homo sapiens GN=RAB35 PE=1 SV=1 - [RAB35_HUMAN]	6	5	9		√	√
Q14964	Ras-related protein Rab-39A OS=Homo sapiens GN=RAB39A PE=1 SV=2 - [RB39A_HUMAN]	4	3	3		√	√
P61018	Ras-related protein Rab-4B OS=Homo sapiens GN=RAB4B PE=1 SV=1 - [RAB4B_HUMAN]	6	6	4		√	√
Q92930	Ras-related protein Rab-8B OS=Homo sapiens GN=RAB8B PE=1 SV=2 - [RAB8B_HUMAN]	8	8	6	√		√
P62834	Ras-related protein Rap-1A OS=Homo sapiens GN=RAP1A PE=1 SV=1 - [RAP1A_HUMAN]	6	7	7		√	√
P61224	Ras-related protein Rap-1b OS=Homo sapiens GN=RAP1B PE=1 SV=1 - [RAP1B_HUMAN]	6	6	8		√	√
P10114	Ras-related protein Rap-2a OS=Homo sapiens GN=RAP2A PE=1 SV=1 - [RAP2A_HUMAN]	3	3	6		√	√
Q9Y3L5	Ras-related protein Rap-2c OS=Homo sapiens GN=RAP2C PE=1 SV=1 - [RAP2C_HUMAN]	3	3	5		√
P62070	Ras-related protein R-Ras2 OS=Homo sapiens GN=RRAS2 PE=1 SV=1 - [RRAS2_HUMAN]	4	5	7		√	√
B7Z332	Receptor expression-enhancing protein 5 OS=Homo sapiens GN=REEP5 PE=1 SV=1 - [B7Z332_HUMAN]	1	1	1		√	√
P23470	Receptor-type tyrosine-protein phosphatase gamma OS=Homo sapiens GN=PTPRG PE=1 SV=4 - [PTPRG_HUMAN]	4	5	3			√
Q5VT52	Regulation of nuclear pre-mRNA domain-containing protein 2 OS=Homo sapiens GN=RPRD2 PE=1 SV=1 - [RPRD2_HUMAN]	3	3	4	√
K7EPP1	RelA-associated inhibitor (Fragment) OS=Homo sapiens GN=PPP1R13L PE=1 SV=1 - [K7EPP1_HUMAN]	1	3	2	√
Q502V2	Relaxin/insulin-like family peptide receptor 3 OS=Homo sapiens GN=RXFP3 PE=2 SV=1 - [Q502V2_HUMAN]	1	2	5			√
Q9NQC3	Reticulon-4 OS=Homo sapiens GN=RTN4 PE=1 SV=2 - [RTN4_HUMAN]	6	7	5	√	√	√
P28749	Retinoblastoma-like protein 1 OS=Homo sapiens GN=RBL1 PE=1 SV=3 - [RBL1_HUMAN]	3	5	9	√
Q08999	Retinoblastoma-like protein 2 OS=Homo sapiens GN=RBL2 PE=1 SV=3 - [RBL2_HUMAN]	4	7	6	√
Q7Z5J4	Retinoic acid-induced protein 1 OS=Homo sapiens GN=RAI1 PE=1 SV=2 - [RAI1_HUMAN]	6	10	7	√	√
Q52LW3	Rho GTPase-activating protein 29 OS=Homo sapiens GN=ARHGAP29 PE=1 SV=2 - [RHG29_HUMAN]	4	7	8		√	√
O15085	Rho guanine nucleotide exchange factor 11 OS=Homo sapiens GN=ARHGEF11 PE=1 SV=1 - [ARHGB_HUMAN]	9	7	9		√	√
E7EV07	Rho guanine nucleotide exchange factor 4 OS=Homo sapiens GN=ARHGEF4 PE=1 SV=2 - [E7EV07_HUMAN]	4	7	9		√	√
Q99575	Ribonucleases P/MRP protein subunit POP1 OS=Homo sapiens GN=POP1 PE=1 SV=2 - [POP1_HUMAN]	10	8	8	√
Q15050	Ribosome biogenesis regulatory protein homolog OS=Homo sapiens GN=RRS1 PE=1 SV=2 - [RRS1_HUMAN]	6	2	2	√
F8WAJ0	RNA helicase OS=Homo sapiens GN=DDX31 PE=1 SV=2 - [F8WAJ0_HUMAN]	4	1	3	√
M0QYC7	RNA polymerase II-associated factor 1 homolog (Fragment) OS=Homo sapiens GN=PAF1 PE=1 SV=1 - [M0QYC7_HUMAN]	1	2	1	√
Q9BWH6	RNA polymerase II-associated protein 1 OS=Homo sapiens GN=RPAP1 PE=1 SV=3 - [RPAP1_HUMAN]	4	6	3	√
Q9H6T3	RNA polymerase II-associated protein 3 OS=Homo sapiens GN=RPAP3 PE=1 SV=2 - [RPAP3_HUMAN]	6	3	4	√
Q96PK6	RNA-binding protein 14 OS=Homo sapiens GN=RBM14 PE=1 SV=2 - [RBM14_HUMAN]	7	7	5	√
P49756	RNA-binding protein 25 OS=Homo sapiens GN=RBM25 PE=1 SV=3 - [RBM25_HUMAN]	4	6	5	√
Q9NW13	RNA-binding protein 28 OS=Homo sapiens GN=RBM28 PE=1 SV=3 - [RBM28_HUMAN]	4	9	8	√
D1LUZ6	RUNX1/C20orf112 fusion protein type 1 (Fragment) OS=Homo sapiens GN=RUNX1/C20orf112 fusion PE=2 SV=1 - [D1LUZ6_HUMAN]	2	2	3	√
Q9BY12	S phase cyclin A-associated protein in the endoplasmic reticulum OS=Homo sapiens GN=SCAPER PE=1 SV=2 - [SCAPE_HUMAN]	8	4	9	√	√
Q14BN4	Sarcolemmal membrane-associated protein OS=Homo sapiens GN=SLMAP PE=1 SV=1 - [SLMAP_HUMAN]	9	6	7		√	√
Q0D2N8	SARM1 protein (Fragment) OS=Homo sapiens GN=SARM1 PE=1 SV=1 - [Q0D2N8_HUMAN]	6	2	6		√
Q5VUG0	Scm-like with four MBT domains protein 2 OS=Homo sapiens GN=SFMBT2 PE=1 SV=1 - [SMBT2_HUMAN]	5	3	4	√
I1VE18	SEC22 vesicle trafficking protein B (Fragment) OS=Homo sapiens GN=SEC22B PE=3 SV=1 - [I1VE18_HUMAN]	2	2	2		√
Q93073	Selenocysteine insertion sequence-binding protein 2-like OS=Homo sapiens GN=SECISBP2L PE=1 SV=3 - [SBP2L_HUMAN]	6	6	6	√
Q14674	Separin OS=Homo sapiens GN=ESPL1 PE=1 SV=3 - [ESPL1_HUMAN]	7	5	9	√	√
Q16181	Septin-7 OS=Homo sapiens GN=SEPT7 PE=1 SV=2 - [SEPT7_HUMAN]	13	8	9		√
O15270	Serine palmitoyltransferase 2 OS=Homo sapiens GN=SPTLC2 PE=1 SV=1 - [SPTC2_HUMAN]	5	2	2		√
Q8WXF0	Serine/arginine-rich splicing factor 12 OS=Homo sapiens GN=SRSF12 PE=2 SV=1 - [SRS12_HUMAN]	5	3	3	√	√
Q8TDR2	Serine/threonine-protein kinase 35 OS=Homo sapiens GN=STK35 PE=1 SV=2 - [STK35_HUMAN]	6	5	3	√	√
Q8N2I9	Serine/threonine-protein kinase 40 OS=Homo sapiens GN=STK40 PE=1 SV=2 - [STK40_HUMAN]	4	4	2	√	√
P20794	Serine/threonine-protein kinase MAK OS=Homo sapiens GN=MAK PE=1 SV=2 - [MAK_HUMAN]	7	6	4	√	√
Q6DT37	Serine/threonine-protein kinase MRCK gamma OS=Homo sapiens GN=CDC42BPG PE=1 SV=2 - [MRCKG_HUMAN]	6	7	5		√
P42345	Serine/threonine-protein kinase mTOR OS=Homo sapiens GN=MTOR PE=1 SV=1 - [MTOR_HUMAN]	12	7	6	√	√
Q16512	Serine/threonine-protein kinase N1 OS=Homo sapiens GN=PKN1 PE=1 SV=2 - [PKN1_HUMAN]	5	5	4	√	√	√
Q16513	Serine/threonine-protein kinase N2 OS=Homo sapiens GN=PKN2 PE=1 SV=1 - [PKN2_HUMAN]	5	6	5	√	√	√
Q6P5Z2	Serine/threonine-protein kinase N3 OS=Homo sapiens GN=PKN3 PE=1 SV=1 - [PKN3_HUMAN]	2	4	2	√	√	√
Q96PY6	Serine/threonine-protein kinase Nek1 OS=Homo sapiens GN=NEK1 PE=1 SV=2 - [NEK1_HUMAN]	5	9	6	√	√
Q6ZWH5	Serine/threonine-protein kinase Nek10 OS=Homo sapiens GN=NEK10 PE=2 SV=3 - [NEK10_HUMAN]	8	5	4	√	√
Q9UPN1	Serine/threonine-protein phosphatase (Fragment) OS=Homo sapiens GN=PPP1CC PE=3 SV=1 - [Q9UPN1_HUMAN]	3	5	5	√	√
G3V5Z3	Serine/threonine-protein phosphatase 4 regulatory subunit 3A OS=Homo sapiens GN=PPP4R3A PE=1 SV=1 - [G3V5Z3_HUMAN]	6	4	7	√	√
O75170	Serine/threonine-protein phosphatase 6 regulatory subunit 2 OS=Homo sapiens GN=PPP6R2 PE=1 SV=2 - [PP6R2_HUMAN]	3	8	4	√	√
Q8IW75	Serpin A12 OS=Homo sapiens GN=SERPINA12 PE=1 SV=1 - [SPA12_HUMAN]	4	3	3		√	√
Q9Y6X0	SET-binding protein OS=Homo sapiens GN=SETBP1 PE=1 SV=3 - [SETBP_HUMAN]	14	11	9	√
U3KQT1	S-formylglutathione hydrolase (Fragment) OS=Homo sapiens GN=ESD PE=1 SV=1 - [U3KQT1_HUMAN]	2	3	2		√
Q3ZTT7	SH3 domain binding protein 1 OS=Homo sapiens GN=SH3BP1 PE=2 SV=1 - [Q3ZTT7_HUMAN]	5	6	2	√	√	√
H7C2G0	SH3 domain-binding glutamic acid-rich protein (Fragment) OS=Homo sapiens GN=SH3BGR PE=1 SV=1 - [H7C2G0_HUMAN]	2	2	4		√
D4QEZ8	Short-chain acyl-CoA dehydrogenase OS=Homo sapiens GN=ACADS PE=2 SV=1 - [D4QEZ8_HUMAN]	2	4	6		√
Q5T5P2	Sickle tail protein homolog OS=Homo sapiens GN=KIAA1217 PE=1 SV=2 - [SKT_HUMAN]	15	11	9		√
Q9BWM7	Sideroflexin-3 OS=Homo sapiens GN=SFXN3 PE=1 SV=3 - [SFXN3_HUMAN]	5	5	5		√
O76094	Signal recognition particle subunit SRP72 OS=Homo sapiens GN=SRP72 PE=1 SV=3 - [SRP72_HUMAN]	4	8	5		√
P42224	Signal transducer and activator of transcription 1-alpha/beta OS=Homo sapiens GN=STAT1 PE=1 SV=2 - [STAT1_HUMAN]	15	13	16	√	√
B5BTZ6	Signal transducer and activator of transcription OS=Homo sapiens GN=STAT3 PE=2 SV=1 - [B5BTZ6_HUMAN]	13	13	14	√	√
E9PAX1	SKI/DACH domain-containing protein 1 OS=Homo sapiens GN=SKIDA1 PE=4 SV=1 - [E9PAX1_HUMAN]	3	2	6	√	√
P12757	Ski-like protein OS=Homo sapiens GN=SKIL PE=1 SV=2 - [SKIL_HUMAN]	7	5	3	√
B7ZM24	SLC12A2 protein OS=Homo sapiens GN=SLC12A2 PE=2 SV=1 - [B7ZM24_HUMAN]	7	10	8			√
P62304	Small nuclear ribonucleoprotein E OS=Homo sapiens GN=SNRPE PE=1 SV=1 - [RUXE_HUMAN]	2	3	1	√
P62306	Small nuclear ribonucleoprotein F OS=Homo sapiens GN=SNRPF PE=1 SV=1 - [RUXF_HUMAN]	1	1	1	√
P62318	Small nuclear ribonucleoprotein Sm D3 OS=Homo sapiens GN=SNRPD3 PE=1 SV=1 - [SMD3_HUMAN]	5	3	4	√
Q99835	Smoothened homolog OS=Homo sapiens GN=SMO PE=1 SV=1 - [SMO_HUMAN]	3	2	2		√
Q15858	Sodium channel protein type 9 subunit alpha OS=Homo sapiens GN=SCN9A PE=1 SV=3 - [SCN9A_HUMAN]	8	8	9			√
Q8IZF0	Sodium leak channel non-selective protein OS=Homo sapiens GN=NALCN PE=1 SV=1 - [NALCN_HUMAN]	9	8	7	√		√
H0Y5P9	Sodium/glucose cotransporter 4 (Fragment) OS=Homo sapiens GN=SLC5A9 PE=1 SV=1 - [H0Y5P9_HUMAN]	2	2	2			√
Q4G0N8	Sodium/hydrogen exchanger 10 OS=Homo sapiens GN=SLC9C1 PE=2 SV=2 - [SL9C1_HUMAN]	4	4	2			√
Q92911	Sodium/iodide cotransporter OS=Homo sapiens GN=SLC5A5 PE=1 SV=1 - [SC5A5_HUMAN]	4	4	3	√		√
P53794	Sodium/myo-inositol cotransporter OS=Homo sapiens GN=SLC5A3 PE=1 SV=2 - [SC5A3_HUMAN]	2	1	2		√	√
Q8TDB8	Solute carrier family 2, facilitated glucose transporter member 14 OS=Homo sapiens GN=SLC2A14 PE=2 SV=1 - [GTR14_HUMAN]	1	2	3	√
Q96RF0	Sorting nexin-18 OS=Homo sapiens GN=SNX18 PE=1 SV=2 - [SNX18_HUMAN]	2	2	4	√	√	√
E5KRP6	Spastin OS=Homo sapiens GN=SPAST PE=3 SV=1 - [E5KRP6_HUMAN]	5	4	4	√	√	√
Q9H6E5	Speckle targeted PIP5K1A-regulated poly(A) polymerase OS=Homo sapiens GN=TUT1 PE=1 SV=2 - [STPAP_HUMAN]	5	6	2	√
P02549	Spectrin alpha chain, erythrocytic 1 OS=Homo sapiens GN=SPTA1 PE=1 SV=5 - [SPTA1_HUMAN]	13	12	9		√
Q01082	Spectrin beta chain, non-erythrocytic 1 OS=Homo sapiens GN=SPTBN1 PE=1 SV=2 - [SPTB2_HUMAN]	72	60	62		√	√
Q6ZQQ2	Spermatogenesis-associated protein 31D1 OS=Homo sapiens GN=SPATA31D1 PE=2 SV=1 - [S31D1_HUMAN]	10	4	3	√
Q8NB90	Spermatogenesis-associated protein 5 OS=Homo sapiens GN=SPATA5 PE=1 SV=3 - [SPAT5_HUMAN]	5	2	5		√
Q8N412	Sperm-tail PG-rich repeat-containing protein 2 OS=Homo sapiens GN=STPG2 PE=2 SV=1 - [STPG2_HUMAN]	5	2	2	√	√
Q15459	Splicing factor 3A subunit 1 OS=Homo sapiens GN=SF3A1 PE=1 SV=1 - [SF3A1_HUMAN]	9	11	9	√
P78362	SRSF protein kinase 2 OS=Homo sapiens GN=SRPK2 PE=1 SV=3 - [SRPK2_HUMAN]	5	3	4	√	√
Q658L1	Stabilizer of axonemal microtubules 2 OS=Homo sapiens GN=SAXO2 PE=2 SV=1 - [SAXO2_HUMAN]	2	2	2	√	√
Q8NDV3	Structural maintenance of chromosomes protein 1B OS=Homo sapiens GN=SMC1B PE=2 SV=2 - [SMC1B_HUMAN]	10	10	6	√	√
Q8IY92	Structure-specific endonuclease subunit SLX4 OS=Homo sapiens GN=SLX4 PE=1 SV=3 - [SLX4_HUMAN]	5	4	3	√
Q6LEU0	STX12 protein (Fragment) OS=Homo sapiens GN=STX12 PE=2 SV=1 - [Q6LEU0_HUMAN]	2	3	4		√	√
P31040	Succinate dehydrogenase [ubiquinone] flavoprotein subunit, mitochondrial OS=Homo sapiens GN=SDHA PE=1 SV=2 - [SDHA_HUMAN]	9	8	7		√
P55809	Succinyl-CoA:3-ketoacid coenzyme A transferase 1, mitochondrial OS=Homo sapiens GN=OXCT1 PE=1 SV=1 - [SCOT1_HUMAN]	7	7	10		√
Q6ZRP7	Sulfhydryl oxidase 2 OS=Homo sapiens GN=QSOX2 PE=1 SV=3 - [QSOX2_HUMAN]	2	3	2	√	√	√
H7BZ17	Sulfotransferase (Fragment) OS=Homo sapiens GN=SULT1C2 PE=1 SV=1 - [H7BZ17_HUMAN]	2	2	1		√
E9PKW4	Sulfotransferase OS=Homo sapiens GN=SULT1A2 PE=1 SV=1 - [E9PKW4_HUMAN]	4	2	3		√
O95425	Supervillin OS=Homo sapiens GN=SVIL PE=1 SV=2 - [SVIL_HUMAN]	14	8	12	√	√	√
P78524	Suppression of tumorigenicity 5 protein OS=Homo sapiens GN=ST5 PE=1 SV=3 - [ST5_HUMAN]	4	3	7	√
Q9Y5Y6	Suppressor of tumorigenicity 14 protein OS=Homo sapiens GN=ST14 PE=1 SV=2 - [ST14_HUMAN]	4	5	4			√
Q9UGT4	Sushi domain-containing protein 2 OS=Homo sapiens GN=SUSD2 PE=1 SV=1 - [SUSD2_HUMAN]	3	1	1			√
Q4LE61	SYMPK variant protein (Fragment) OS=Homo sapiens GN=SYMPK variant protein PE=2 SV=1 - [Q4LE61_HUMAN]	5	10	5	√	√	√
O15056	Synaptojanin-2 OS=Homo sapiens GN=SYNJ2 PE=1 SV=3 - [SYNJ2_HUMAN]	5	5	9		√
Q9BQG1	Synaptotagmin-3 OS=Homo sapiens GN=SYT3 PE=2 SV=1 - [SYT3_HUMAN]	1	3	5		√
E9PDN4	Synaptotagmin-9 OS=Homo sapiens GN=SYT9 PE=1 SV=2 - [E9PDN4_HUMAN]	3	3	3		√
Q8TDW5	Synaptotagmin-like protein 5 OS=Homo sapiens GN=SYTL5 PE=1 SV=1 - [SYTL5_HUMAN]	5	2	7	√		√
O75558	Syntaxin-11 OS=Homo sapiens GN=STX11 PE=1 SV=1 - [STX11_HUMAN]	6	1	3		√	√
Q8N4C7	Syntaxin-19 OS=Homo sapiens GN=STX19 PE=1 SV=1 - [STX19_HUMAN]	1	2	3		√	√
O00186	Syntaxin-binding protein 3 OS=Homo sapiens GN=STXBP3 PE=1 SV=2 - [STXB3_HUMAN]	4	2	6		√	√
O95271	Tankyrase-1 OS=Homo sapiens GN=TNKS PE=1 SV=2 - [TNKS1_HUMAN]	6	10	8	√	√
H0Y6D8	TATA-box-binding protein (Fragment) OS=Homo sapiens GN=TBP PE=1 SV=1 - [H0Y6D8_HUMAN]	2	2	2	√
Q8IWY7	Tau-tubulin kinase OS=Homo sapiens GN=TTBK2 PE=1 SV=1 - [Q8IWY7_HUMAN]	6	6	10	√	√
Q9Y2I9	TBC1 domain family member 30 OS=Homo sapiens GN=TBC1D30 PE=1 SV=2 - [TBC30_HUMAN]	3	3	8		√	√
Q9NVR7	TBCC domain-containing protein 1 OS=Homo sapiens GN=TBCCD1 PE=2 SV=1 - [TBCC1_HUMAN]	2	2	3		√
P78371	T-complex protein 1 subunit beta OS=Homo sapiens GN=CCT2 PE=1 SV=4 - [TCPB_HUMAN]	11	7	8		√
Q6ZSZ6	Teashirt homolog 1 OS=Homo sapiens GN=TSHZ1 PE=1 SV=2 - [TSH1_HUMAN]	10	5	4	√
Q9NRE2	Teashirt homolog 2 OS=Homo sapiens GN=TSHZ2 PE=1 SV=3 - [TSH2_HUMAN]	3	6	6	√
Q8NA31	Telomere repeats-binding bouquet formation protein 1 OS=Homo sapiens GN=TERB1 PE=2 SV=3 - [TERB1_HUMAN]	7	3	4	√
Q9P2T0	Testicular haploid expressed gene protein OS=Homo sapiens GN=THEG PE=1 SV=1 - [THEG_HUMAN]	2	4	4	√
Q9NXF1	Testis-expressed protein 10 OS=Homo sapiens GN=TEX10 PE=1 SV=2 - [TEX10_HUMAN]	7	6	7	√
O75954	Tetraspanin-9 OS=Homo sapiens GN=TSPAN9 PE=1 SV=1 - [TSN9_HUMAN]	3	1	1	√		√
Q8NDW8	Tetratricopeptide repeat protein 21A OS=Homo sapiens GN=TTC21A PE=2 SV=3 - [TT21A_HUMAN]	4	6	7		√
Q5TAA0	Tetratricopeptide repeat protein 22 OS=Homo sapiens GN=TTC22 PE=2 SV=1 - [TTC22_HUMAN]	3	4	3	√	√
Q6PGP7	Tetratricopeptide repeat protein 37 OS=Homo sapiens GN=TTC37 PE=1 SV=1 - [TTC37_HUMAN]	8	8	7	√	√
P52888	Thimet oligopeptidase OS=Homo sapiens GN=THOP1 PE=1 SV=2 - [THOP1_HUMAN]	4	3	6		√
Q9H1E5	Thioredoxin-related transmembrane protein 4 OS=Homo sapiens GN=TMX4 PE=1 SV=1 - [TMX4_HUMAN]	3	1	2		√	√
C9JKN6	Thrombospondin type-1 domain-containing protein 7B OS=Homo sapiens GN=THSD7B PE=1 SV=3 - [C9JKN6_HUMAN]	3	4	2			√
Q15643	Thyroid receptor-interacting protein 11 OS=Homo sapiens GN=TRIP11 PE=1 SV=3 - [TRIPB_HUMAN]	13	13	9		√	√
Q8TDR0	TRAF3-interacting protein 1 OS=Homo sapiens GN=TRAF3IP1 PE=1 SV=1 - [MIPT3_HUMAN]	3	2	3		√
G3V220	Transcription elongation regulator 1 OS=Homo sapiens GN=TCERG1 PE=1 SV=1 - [G3V220_HUMAN]	5	8	7	√
P48380	Transcription factor RFX3 OS=Homo sapiens GN=RFX3 PE=1 SV=2 - [RFX3_HUMAN]	1	3	2	√
P35716	Transcription factor SOX-11 OS=Homo sapiens GN=SOX11 PE=1 SV=2 - [SOX11_HUMAN]	6	5	7	√
Q06945	Transcription factor SOX-4 OS=Homo sapiens GN=SOX4 PE=1 SV=1 - [SOX4_HUMAN]	2	7	3	√
P35712	Transcription factor SOX-6 OS=Homo sapiens GN=SOX6 PE=1 SV=3 - [SOX6_HUMAN]	7	5	8	√
P29084	Transcription initiation factor IIE subunit beta OS=Homo sapiens GN=GTF2E2 PE=1 SV=1 - [T2EB_HUMAN]	3	5	6	√
Q6P1X5	Transcription initiation factor TFIID subunit 2 OS=Homo sapiens GN=TAF2 PE=1 SV=3 - [TAF2_HUMAN]	3	3	3	√
Q5VWG9	Transcription initiation factor TFIID subunit 3 OS=Homo sapiens GN=TAF3 PE=1 SV=1 - [TAF3_HUMAN]	3	5	3	√
Q9UNY4	Transcription termination factor 2 OS=Homo sapiens GN=TTF2 PE=1 SV=2 - [TTF2_HUMAN]	6	8	4	√	√
Q86T24	Transcriptional regulator Kaiso OS=Homo sapiens GN=ZBTB33 PE=1 SV=2 - [KAISO_HUMAN]	2	3	1	√	√
Q12986	Transcriptional repressor NF-X1 OS=Homo sapiens GN=NFX1 PE=1 SV=2 - [NFX1_HUMAN]	6	6	5	√
Q12788	Transducin beta-like protein 3 OS=Homo sapiens GN=TBL3 PE=1 SV=2 - [TBL3_HUMAN]	3	3	7	√
Q13595	Transformer-2 protein homolog alpha OS=Homo sapiens GN=TRA2A PE=1 SV=1 - [TRA2A_HUMAN]	7	5	6	√
O95359	Transforming acidic coiled-coil-containing protein 2 OS=Homo sapiens GN=TACC2 PE=1 SV=3 - [TACC2_HUMAN]	13	11	11	√	√
J3KQ45	Trans-Golgi network integral membrane protein 2 OS=Homo sapiens GN=TGOLN2 PE=1 SV=1 - [J3KQ45_HUMAN]	5	11	5		√	√
Q9BX84	Transient receptor potential cation channel subfamily M member 6 OS=Homo sapiens GN=TRPM6 PE=1 SV=2 - [TRPM6_HUMAN]	8	8	7			√
Q13144	Translation initiation factor eIF-2B subunit epsilon OS=Homo sapiens GN=EIF2B5 PE=1 SV=3 - [EI2BE_HUMAN]	4	3	3	√	√
Q8N6Q1	Transmembrane and coiled-coil domain-containing protein 5A OS=Homo sapiens GN=TMCO5A PE=2 SV=2 - [TMC5A_HUMAN]	3	4	2		√	√
Q8TDI7	Transmembrane channel-like protein 2 OS=Homo sapiens GN=TMC2 PE=2 SV=3 - [TMC2_HUMAN]	3	4	7	√		√
Q86T26	Transmembrane protease serine 11B OS=Homo sapiens GN=TMPRSS11B PE=2 SV=3 - [TM11B_HUMAN]	3	3	2			√
Q7Z410	Transmembrane protease serine 9 OS=Homo sapiens GN=TMPRSS9 PE=1 SV=2 - [TMPS9_HUMAN]	3	2	4			√
Q24JP5	Transmembrane protein 132A OS=Homo sapiens GN=TMEM132A PE=1 SV=1 - [T132A_HUMAN]	4	2	3		√
Q9H0V1	Transmembrane protein 168 OS=Homo sapiens GN=TMEM168 PE=2 SV=2 - [TM168_HUMAN]	2	4	4			√
Q96SK2	Transmembrane protein 209 OS=Homo sapiens GN=TMEM209 PE=1 SV=2 - [TM209_HUMAN]	2	2	4			√
Q7Z2Z1	Treslin OS=Homo sapiens GN=TICRR PE=1 SV=2 - [TICRR_HUMAN]	9	8	6	√
Q9NVH6	Trimethyllysine dioxygenase, mitochondrial OS=Homo sapiens GN=TMLHE PE=1 SV=1 - [TMLH_HUMAN]	3	3	4		√
Q9UPQ9	Trinucleotide repeat-containing gene 6B protein OS=Homo sapiens GN=TNRC6B PE=1 SV=4 - [TNR6B_HUMAN]	7	7	6		√
Q9C040	Tripartite motif-containing protein 2 OS=Homo sapiens GN=TRIM2 PE=1 SV=1 - [TRIM2_HUMAN]	2	5	5		√
Q96LD4	Tripartite motif-containing protein 47 OS=Homo sapiens GN=TRIM47 PE=1 SV=2 - [TRI47_HUMAN]	2	2	1	√	√
D3DRP0	Tropomyosin 2 (Beta), isoform CRA_c OS=Homo sapiens GN=TPM2 PE=4 SV=1 - [D3DRP0_HUMAN]	5	4	7		√
K7EN02	Troponin I, cardiac muscle OS=Homo sapiens GN=TNNI3 PE=1 SV=1 - [K7EN02_HUMAN]	3	4	4	√	√
Q8N841	Tubulin polyglutamylase TTLL6 OS=Homo sapiens GN=TTLL6 PE=1 SV=2 - [TTLL6_HUMAN]	5	4	2		√
O60522	Tudor domain-containing protein 6 OS=Homo sapiens GN=TDRD6 PE=2 SV=2 - [TDRD6_HUMAN]	7	8	8		√
Q9Y275	Tumor necrosis factor ligand superfamily member 13B OS=Homo sapiens GN=TNFSF13B PE=1 SV=1 - [TN13B_HUMAN]	3	4	2	√	√	√
P23510	Tumor necrosis factor ligand superfamily member 4 OS=Homo sapiens GN=TNFSF4 PE=1 SV=1 - [TNFL4_HUMAN]	2	1	3		√	√
Q8N726	Tumor suppressor ARF OS=Homo sapiens GN=CDKN2A PE=1 SV=2 - [ARF_HUMAN]	3	3	3	√	√
Q2TAM9	Tumor suppressor candidate gene 1 protein OS=Homo sapiens GN=TUSC1 PE=1 SV=3 - [TUSC1_HUMAN]	2	3	4	√
Q6NUK7	Tyrosine-protein kinase (Fragment) OS=Homo sapiens GN=LYN PE=2 SV=1 - [Q6NUK7_HUMAN]	6	7	3	√	√	√
C9J5X1	Tyrosine-protein kinase receptor OS=Homo sapiens GN=IGF1R PE=1 SV=1 - [C9J5X1_HUMAN]	2	5	4		√	√
Q9H3Y6	Tyrosine-protein kinase Srms OS=Homo sapiens GN=SRMS PE=1 SV=1 - [SRMS_HUMAN]	2	2	3		√	√
Q9Y2Z4	Tyrosine--tRNA ligase, mitochondrial OS=Homo sapiens GN=YARS2 PE=1 SV=2 - [SYYM_HUMAN]	5	3	5		√
B5BU08	U2 small nuclear RNA auxillary factor 1 isoform a OS=Homo sapiens GN=U2AF1 PE=2 SV=1 - [B5BU08_HUMAN]	6	4	6	√
O43818	U3 small nucleolar RNA-interacting protein 2 OS=Homo sapiens GN=RRP9 PE=1 SV=1 - [U3IP2_HUMAN]	4	9	5	√
Q96QD9	UAP56-interacting factor OS=Homo sapiens GN=FYTTD1 PE=1 SV=3 - [UIF_HUMAN]	4	4	7	√
Q6UW78	Ubiquinol-cytochrome-c reductase complex assembly factor 3 OS=Homo sapiens GN=UQCC3 PE=1 SV=2 - [UQCC3_HUMAN]	4	5	4		√
G3V434	Ubiquinone biosynthesis monooxygenase COQ6, mitochondrial OS=Homo sapiens GN=COQ6 PE=1 SV=1 - [G3V434_HUMAN]	2	2	3		√
Q14694	Ubiquitin carboxyl-terminal hydrolase 10 OS=Homo sapiens GN=USP10 PE=1 SV=2 - [UBP10_HUMAN]	2	4	5	√	√
Q70CQ4	Ubiquitin carboxyl-terminal hydrolase 31 OS=Homo sapiens GN=USP31 PE=2 SV=2 - [UBP31_HUMAN]	9	9	16	√	√
Q70CQ2	Ubiquitin carboxyl-terminal hydrolase 34 OS=Homo sapiens GN=USP34 PE=1 SV=2 - [UBP34_HUMAN]	9	10	7	√	√
Q9P2H5	Ubiquitin carboxyl-terminal hydrolase 35 OS=Homo sapiens GN=USP35 PE=1 SV=3 - [UBP35_HUMAN]	3	10	4	√	√
Q70EK9	Ubiquitin carboxyl-terminal hydrolase 51 OS=Homo sapiens GN=USP51 PE=2 SV=1 - [UBP51_HUMAN]	5	5	2	√	√
Q9NZ09	Ubiquitin-associated protein 1 OS=Homo sapiens GN=UBAP1 PE=1 SV=1 - [UBAP1_HUMAN]	2	1	3		√
Q5T3E1	Ubiquitinyl hydrolase 1 OS=Homo sapiens GN=USP49 PE=3 SV=1 - [Q5T3E1_HUMAN]	1	1	3	√	√
F4MH35	Ubiquitously transcribed tetratricopeptide repeat protein Y-linked transcript variant 59 OS=Homo sapiens GN=UTY PE=2 SV=2 - [F4MH35_HUMAN]	2	1	4	√
O94888	UBX domain-containing protein 7 OS=Homo sapiens GN=UBXN7 PE=1 SV=2 - [UBXN7_HUMAN]	5	4	4	√	√
Q6UX72	UDP-GlcNAc:betaGal beta-1,3-N-acetylglucosaminyltransferase 9 OS=Homo sapiens GN=B3GNT9 PE=2 SV=1 - [B3GN9_HUMAN]	3	4	4		√
Q9NYU1	UDP-glucose:glycoprotein glucosyltransferase 2 OS=Homo sapiens GN=UGGT2 PE=1 SV=4 - [UGGG2_HUMAN]	7	14	6		√
F5H7K1	UPF0505 protein C16orf62 OS=Homo sapiens GN=C16orf62 PE=1 SV=1 - [F5H7K1_HUMAN]	6	13	6		√	√
Q9HCM3	UPF0606 protein KIAA1549 OS=Homo sapiens GN=KIAA1549 PE=1 SV=4 - [K1549_HUMAN]	6	7	5	√		√
Q96RL7	Vacuolar protein sorting-associated protein 13A OS=Homo sapiens GN=VPS13A PE=1 SV=2 - [VP13A_HUMAN]	13	11	10		√
Q5THJ4	Vacuolar protein sorting-associated protein 13D OS=Homo sapiens GN=VPS13D PE=1 SV=2 - [VP13D_HUMAN]	18	14	11		√
Q9P253	Vacuolar protein sorting-associated protein 18 homolog OS=Homo sapiens GN=VPS18 PE=1 SV=2 - [VPS18_HUMAN]	7	4	3		√
H7C0K2	Vacuolar protein sorting-associated protein 41 homolog (Fragment) OS=Homo sapiens GN=VPS41 PE=1 SV=1 - [H7C0K2_HUMAN]	3	2	2		√
C9JJN9	Vacuolar protein sorting-associated protein 8 homolog OS=Homo sapiens GN=VPS8 PE=1 SV=1 - [C9JJN9_HUMAN]	5	5	4		√
P17948	Vascular endothelial growth factor receptor 1 OS=Homo sapiens GN=FLT1 PE=1 SV=2 - [VGFR1_HUMAN]	7	5	5		√	√
E9PD35	Vascular endothelial growth factor receptor 3 OS=Homo sapiens GN=FLT4 PE=1 SV=1 - [E9PD35_HUMAN]	6	4	4	√	√	√
Q9Y3E0	Vesicle transport protein GOT1B OS=Homo sapiens GN=GOLT1B PE=1 SV=1 - [GOT1B_HUMAN]	4	3	3		√
G8JLK1	Vesicle transport protein USE1 OS=Homo sapiens GN=USE1 PE=1 SV=2 - [G8JLK1_HUMAN]	4	4	4		√
Q9UBN1	Voltage-dependent calcium channel gamma-4 subunit OS=Homo sapiens GN=CACNG4 PE=2 SV=1 - [CCG4_HUMAN]	2	1	2			√
E9PDR3	Voltage-dependent N-type calcium channel subunit alpha OS=Homo sapiens GN=CACNA1B PE=1 SV=3 - [E9PDR3_HUMAN]	9	9	7			√
O43497	Voltage-dependent T-type calcium channel subunit alpha-1G OS=Homo sapiens GN=CACNA1G PE=1 SV=3 - [CAC1G_HUMAN]	7	3	8		√	√
Q9P0X4	Voltage-dependent T-type calcium channel subunit alpha-1I OS=Homo sapiens GN=CACNA1I PE=1 SV=1 - [CAC1I_HUMAN]	6	5	12			√
B7Z8E5	Voltage-gated potassium channel subunit beta-1 OS=Homo sapiens GN=KCNAB1 PE=1 SV=1 - [B7Z8E5_HUMAN]	6	4	4		√
Q502W6	von Willebrand factor A domain-containing protein 3B OS=Homo sapiens GN=VWA3B PE=1 SV=3 - [VWA3B_HUMAN]	5	7	7	√
P38606	V-type proton ATPase catalytic subunit A OS=Homo sapiens GN=ATP6V1A PE=1 SV=2 - [VATA_HUMAN]	7	7	11		√	√
Q8TF30	WASP homolog-associated protein with actin, membranes and microtubules OS=Homo sapiens GN=WHAMM PE=1 SV=2 - [WHAMM_HUMAN]	3	4	3		√
Q9UNX4	WD repeat-containing protein 3 OS=Homo sapiens GN=WDR3 PE=1 SV=1 - [WDR3_HUMAN]	5	5	5	√
Q6PJI9	WD repeat-containing protein 59 OS=Homo sapiens GN=WDR59 PE=1 SV=2 - [WDR59_HUMAN]	2	6	3		√
Q8TBY9	WD repeat-containing protein 66 OS=Homo sapiens GN=WDR66 PE=2 SV=2 - [WDR66_HUMAN]	5	5	5		√
Q14191	Werner syndrome ATP-dependent helicase OS=Homo sapiens GN=WRN PE=1 SV=2 - [WRN_HUMAN]	3	6	3	√
D3DUP2	WNK lysine deficient protein kinase 1, isoform CRA_d OS=Homo sapiens GN=WNK1 PE=4 SV=1 - [D3DUP2_HUMAN]	5	4	4		√
Q702N8	Xin actin-binding repeat-containing protein 1 OS=Homo sapiens GN=XIRP1 PE=1 SV=1 - [XIRP1_HUMAN]	4	7	10	√		√
Q9ULM3	YEATS domain-containing protein 2 OS=Homo sapiens GN=YEATS2 PE=1 SV=2 - [YETS2_HUMAN]	4	4	7	√
Q6PJQ2	ZFAT protein (Fragment) OS=Homo sapiens GN=ZFAT PE=2 SV=1 - [Q6PJQ2_HUMAN]	3	3	2	√	√
Q9NX65	Zinc finger and SCAN domain-containing protein 32 OS=Homo sapiens GN=ZSCAN32 PE=1 SV=3 - [ZSC32_HUMAN]	3	4	1	√
Q5T200	Zinc finger CCCH domain-containing protein 13 OS=Homo sapiens GN=ZC3H13 PE=1 SV=1 - [ZC3HD_HUMAN]	7	12	11	√	√
H0YJA2	Zinc finger CCCH domain-containing protein 14 (Fragment) OS=Homo sapiens GN=ZC3H14 PE=1 SV=1 - [H0YJA2_HUMAN]	3	3	3	√	√
M0QY97	Zinc finger CCCH domain-containing protein 4 (Fragment) OS=Homo sapiens GN=ZC3H4 PE=1 SV=1 - [M0QY97_HUMAN]	4	5	3	√
Q5VZL5	Zinc finger MYM-type protein 4 OS=Homo sapiens GN=ZMYM4 PE=1 SV=1 - [ZMYM4_HUMAN]	5	7	3	√	√
H0YH25	Zinc finger MYM-type protein 5 (Fragment) OS=Homo sapiens GN=ZMYM5 PE=1 SV=1 - [H0YH25_HUMAN]	3	4	6	√
D3DUC1	Zinc finger protein 263, isoform CRA_a OS=Homo sapiens GN=ZNF263 PE=4 SV=1 - [D3DUC1_HUMAN]	4	2	4	√
J3KNV1	Zinc finger protein 292 OS=Homo sapiens GN=ZNF292 PE=1 SV=1 - [J3KNV1_HUMAN]	8	7	11	√
Q9Y6Q3	Zinc finger protein 37 homolog OS=Homo sapiens GN=ZFP37 PE=2 SV=3 - [ZFP37_HUMAN]	7	3	5	√
Q96N95	Zinc finger protein 396 OS=Homo sapiens GN=ZNF396 PE=1 SV=2 - [ZN396_HUMAN]	1	1	1	√	√
F5H212	Zinc finger protein 40 OS=Homo sapiens GN=HIVEP1 PE=1 SV=2 - [F5H212_HUMAN]	10	7	9	√	√
Q7Z4V0	Zinc finger protein 438 OS=Homo sapiens GN=ZNF438 PE=2 SV=1 - [ZN438_HUMAN]	5	3	2	√
Q92618	Zinc finger protein 516 OS=Homo sapiens GN=ZNF516 PE=1 SV=1 - [ZN516_HUMAN]	7	10	8	√
Q6AHZ1	Zinc finger protein 518A OS=Homo sapiens GN=ZNF518A PE=1 SV=2 - [Z518A_HUMAN]	6	10	13	√
M0QZV4	Zinc finger protein 578 (Fragment) OS=Homo sapiens GN=ZNF578 PE=4 SV=1 - [M0QZV4_HUMAN]	3	2	3	√
Q969S3	Zinc finger protein 622 OS=Homo sapiens GN=ZNF622 PE=1 SV=1 - [ZN622_HUMAN]	4	6	3	√	√
Q8N1G0	Zinc finger protein 687 OS=Homo sapiens GN=ZNF687 PE=1 SV=1 - [ZN687_HUMAN]	8	5	6	√
Q9ULD5	Zinc finger protein 777 OS=Homo sapiens GN=ZNF777 PE=1 SV=2 - [ZN777_HUMAN]	3	5	3	√
I3L119	Zinc finger protein 785 (Fragment) OS=Homo sapiens GN=ZNF785 PE=4 SV=1 - [I3L119_HUMAN]	2	3	1	√
Q9UPR6	Zinc finger RNA-binding protein 2 OS=Homo sapiens GN=ZFR2 PE=2 SV=3 - [ZFR2_HUMAN]	2	4	3	√
Q8IYH5	ZZ-type zinc finger-containing protein 3 OS=Homo sapiens GN=ZZZ3 PE=1 SV=1 - [ZZZ3_HUMAN]	3	5	3	√
